# Supplementary material for: Global relationships in tree functional traits
Source: Springer Nature journal article supplement (doi:10.1038/s41467-022-30888-2), 2022-06-08
Supplement: MOESM1 [file 41467_2022_30888_MOESM1_ESM.pdf]

*Supplementary Information File*

**Global relationships in tree functional traits**

Daniel S. Maynard *et al.*

Institute of Integrative Biology, ETH Zürich, 8092 Zürich, Switzerland

Email: dan.s.maynard@gmail.com

**CONTENTS:**

- Supplementary Figures 1-25
- Supplementary Table 1-5
- Supplementary Notes
- Supplementary References

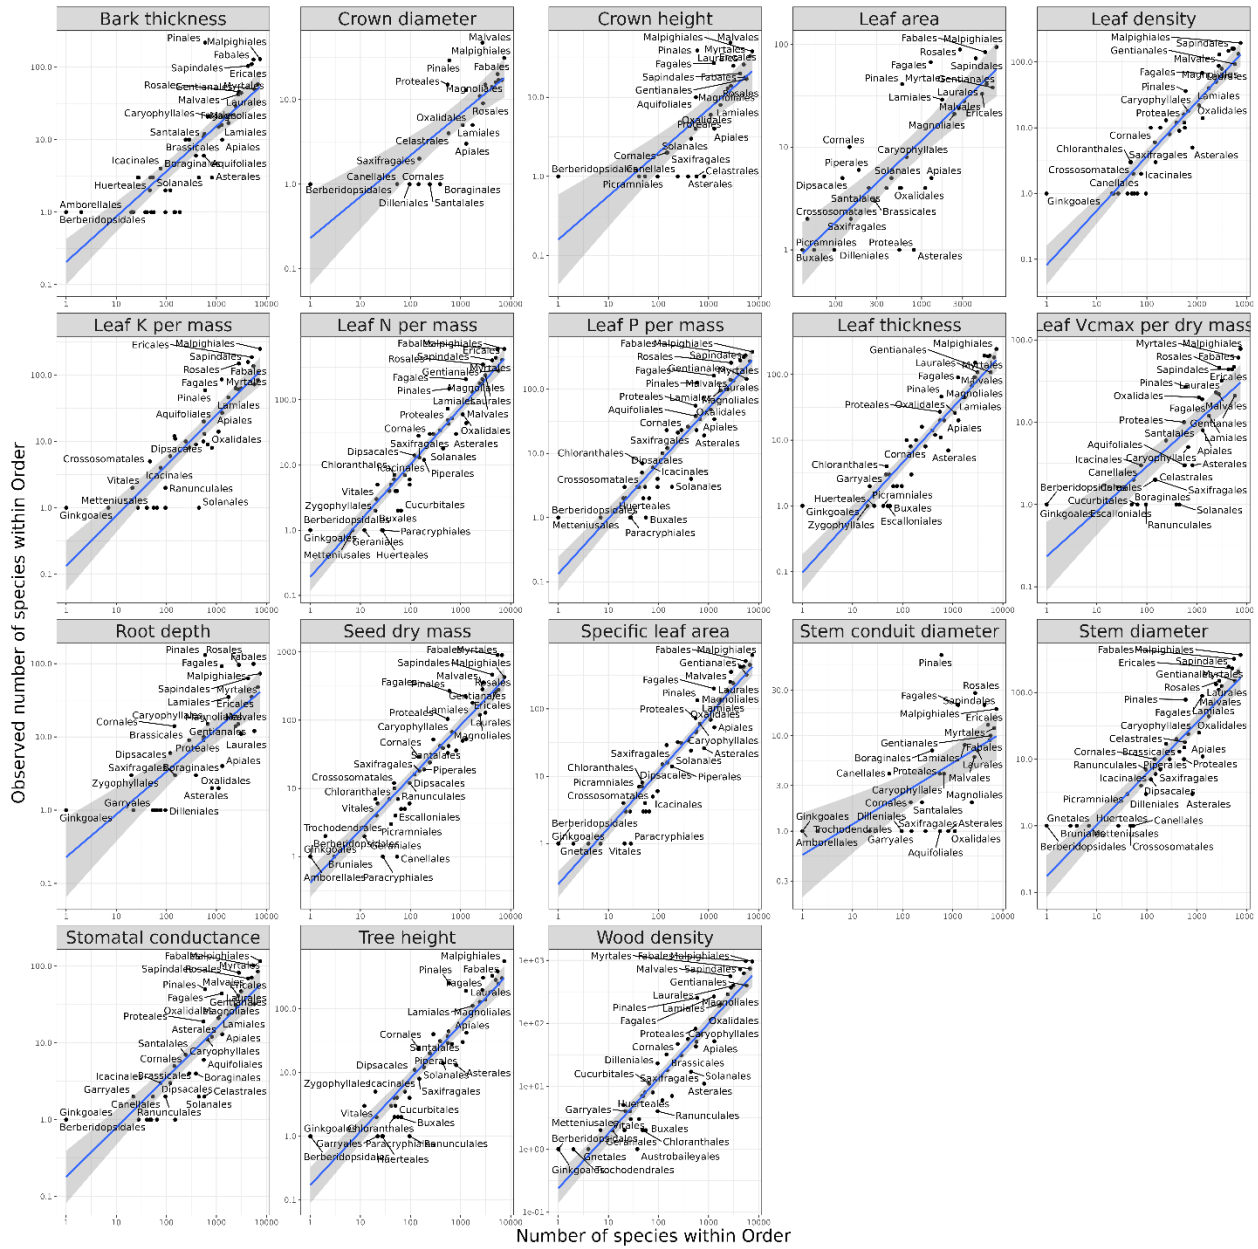

**Supplementary Figure 1.** The relationships between the number of species within each taxonomic order<sup>21</sup>, versus the observed number of species for each trait. The line shows the standard linear regression fit, with the shaded region giving the 95% confidence interval for the mean.

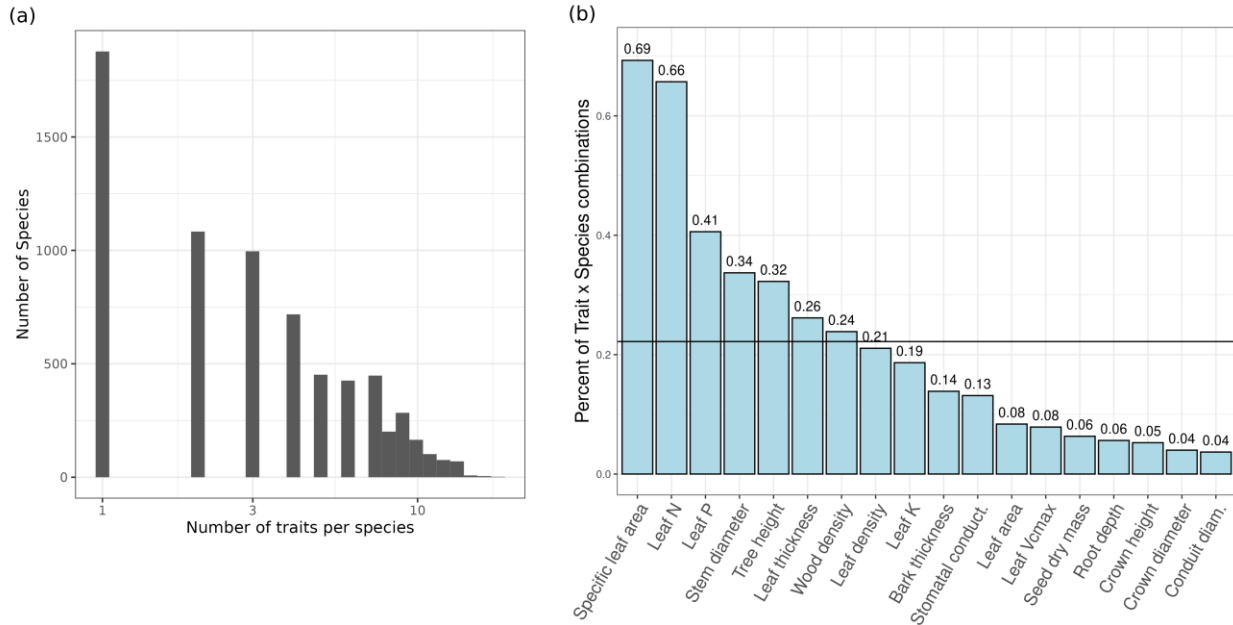

6

7 **Supplementary Figure 2. The degree of missingness in the data.** (a) The distribution of the  
 8 number of traits per species. There was an average of 4 traits measured per species, with 423  
 9 species having more than 10 unique traits measures, and two species (*Picea abies* and *Pinus*  
 10 *sylvestris*) having all traits measured. (b) The proportion of unique species with at least one  
 11 measurement for each trait. The dataset captured 22% of all trait-by-species combinations  
 12 (horizontal black line), slightly better than other large-scale trait analyses across the entire plant  
 13 kingdom<sup>30,31</sup>.

14

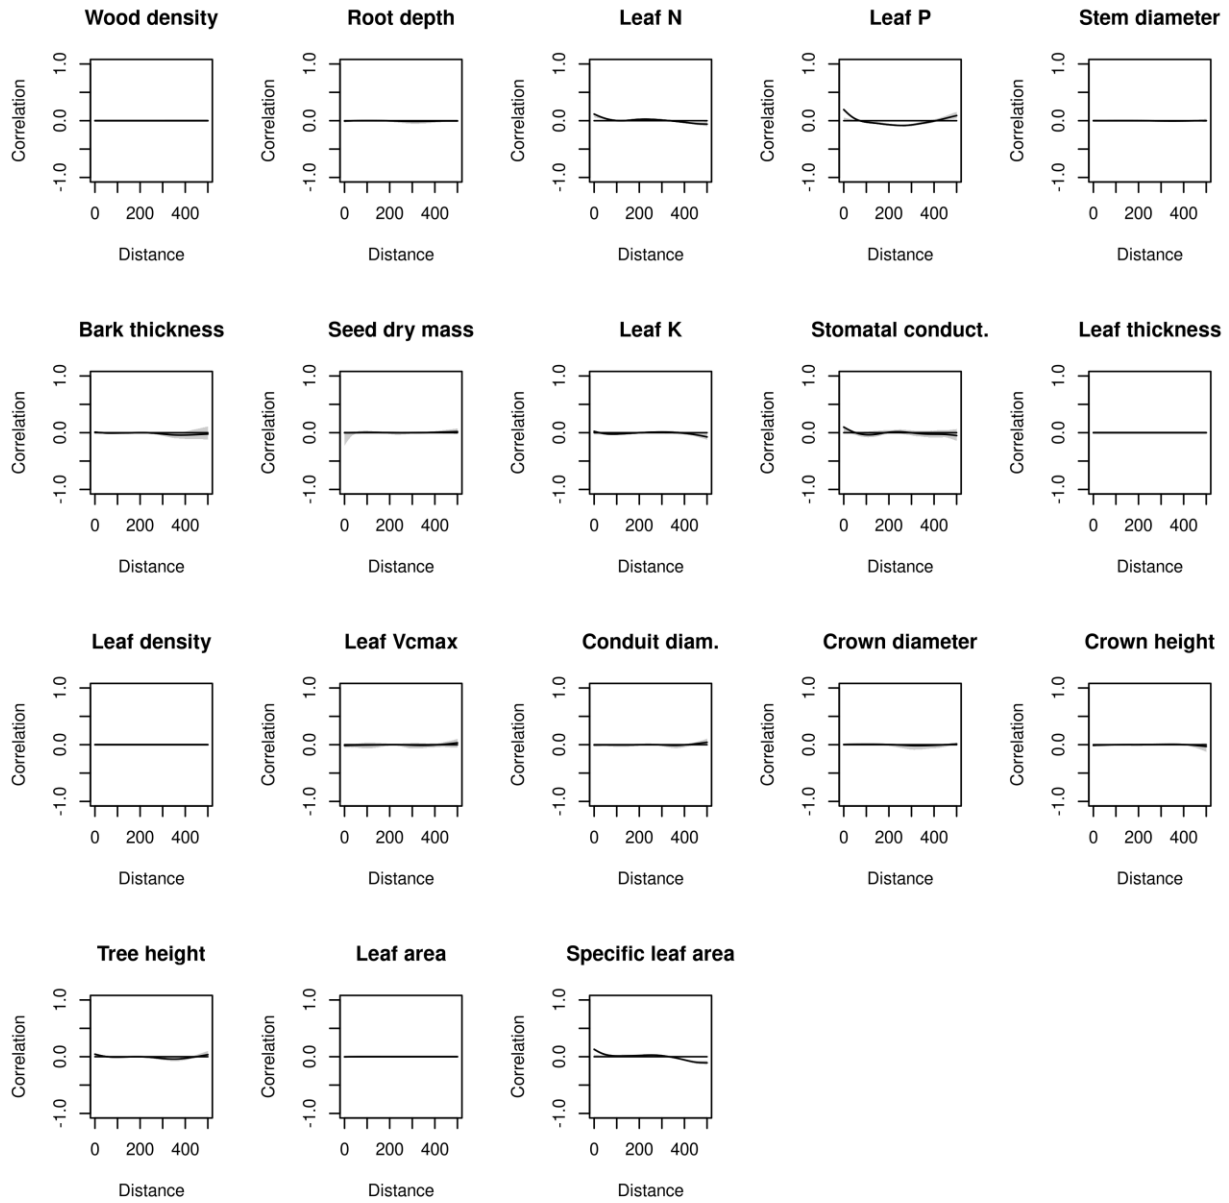

15

16 **Supplementary Figure 3.** Residual spatial autocorrelation (Moran's I) for all 18 traits, assessed  
 17 using standard linear regression models.

18

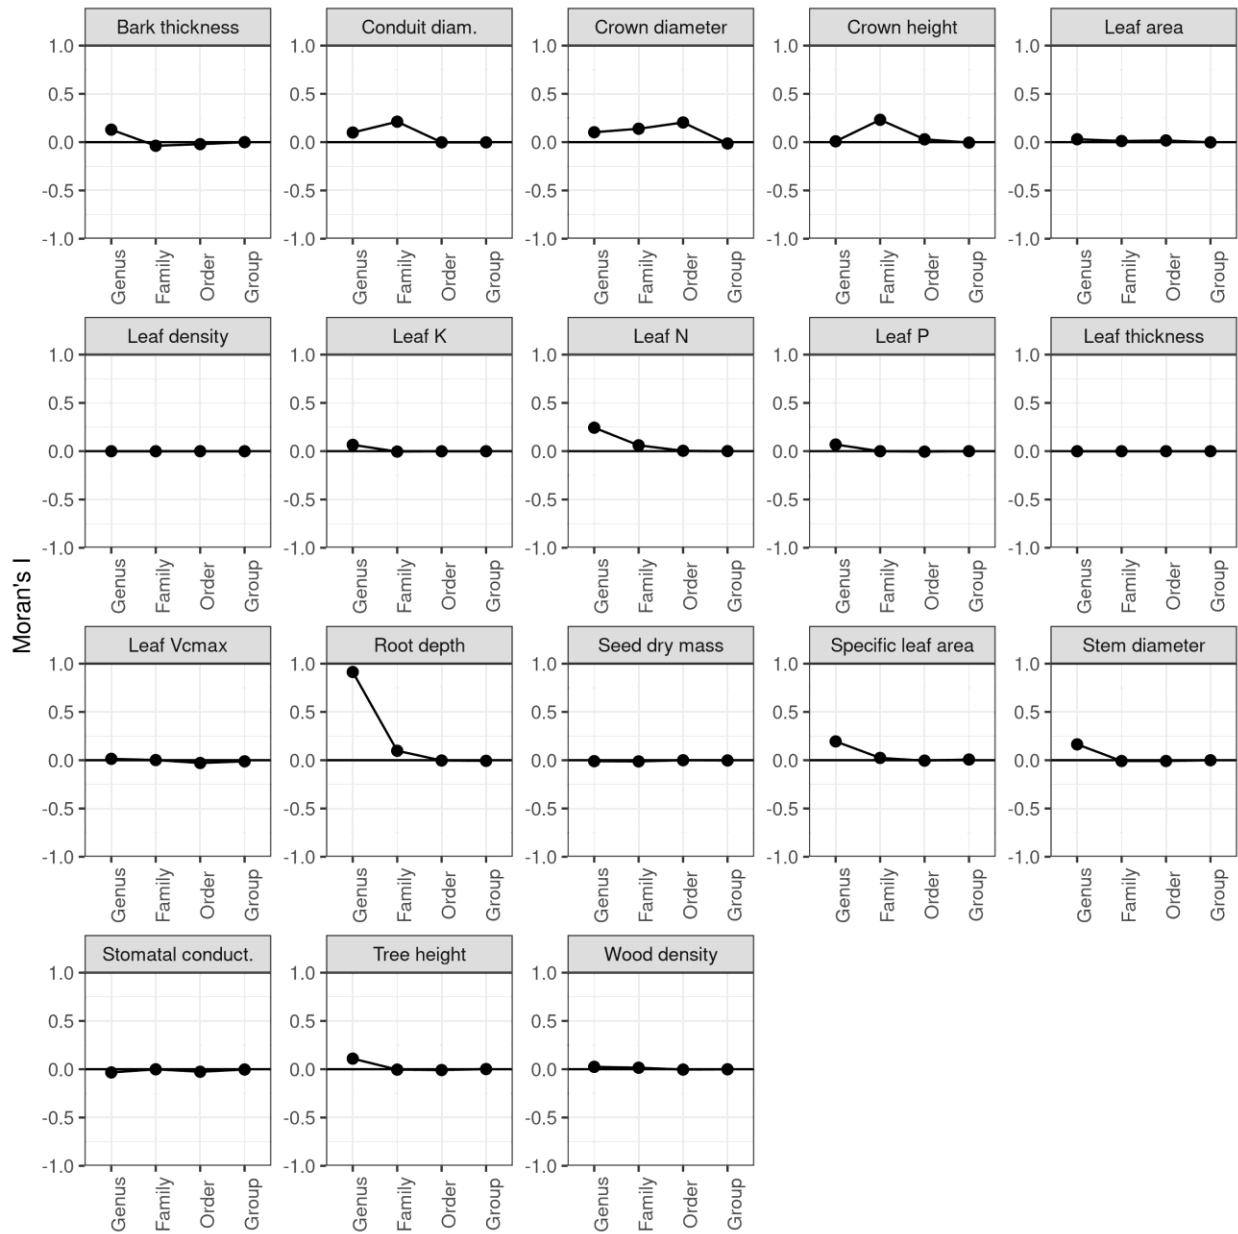

19

20

21 **Supplementary Figure 4.** Residual taxonomic autocorrelation (Moran's I) for all 18 traits,  
 22 assessed using standard linear regression models.

23

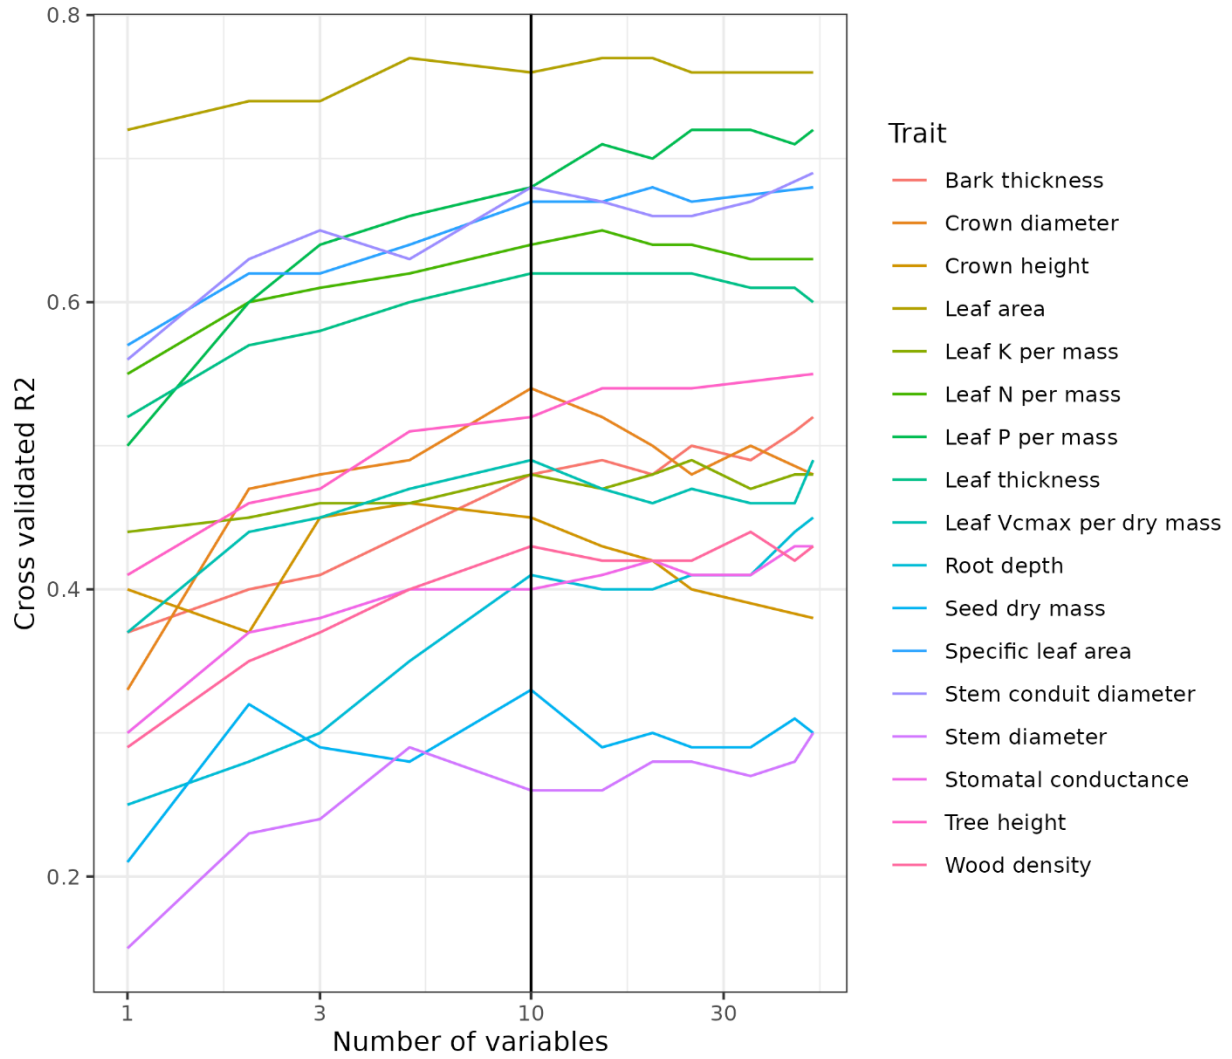

24

25 **Supplementary Figure 5.** The out-of-fit R<sup>2</sup> as a function of the number of environmental and  
 26 phylogenetic predictors in the random forest model. The final models used 10 environmental and  
 27 phylogenetic predictors, which exhibited consistency high R<sup>2</sup> values while also prioritizing  
 28 model parsimony to avoid overfitting.

29

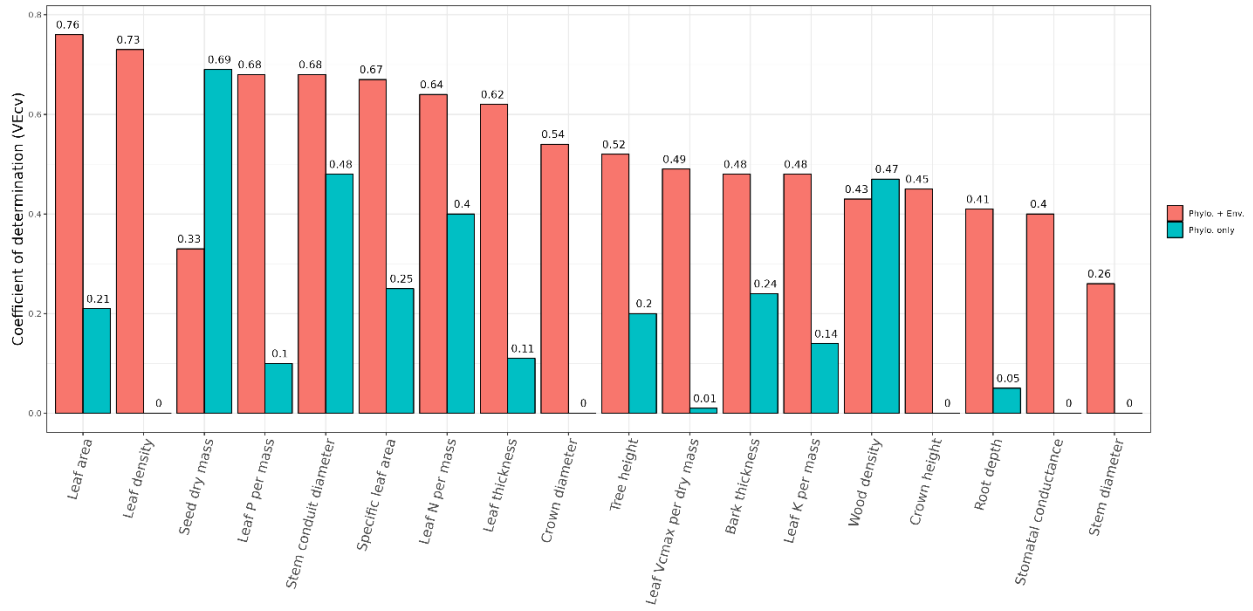

30

31 **Supplementary Figure 6.** The performance of the models ( $R^2_{VEcv}$ ) with phylogenetic information  
 32 only (green) vs. phylogenetic and environmental covariates included (red).

33

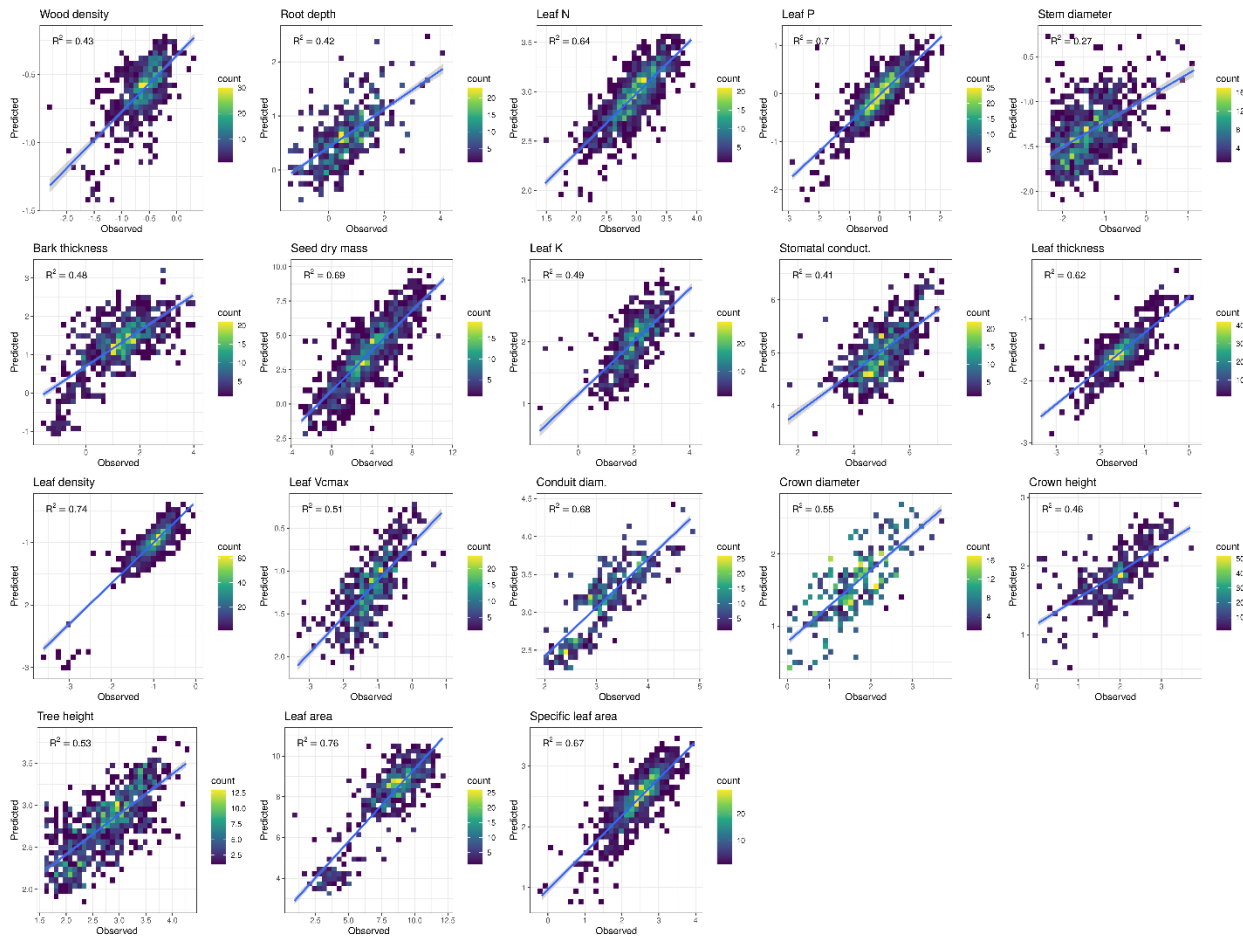

34

35 **Supplementary Figure 7.** The observed vs. predicted values for the out-of-fit data. The highest  
 36 accuracy was with leaf area ( $R^2 = 0.76$ ) with the lowest being stem diameter ( $R^2 = 0.27$ ), with the  
 37 latter reflecting the fact that stem diameter is closely related to tree age. Hence, for traits with  
 38 strong ontogenetic variation (stem diameter, tree height, root depth, crown height, crown width)  
 39 we used quantile random forest to predict the maximum values (see Methods). The points are  
 40 shaded by density (yellow = many points in that pixel; blue = few). The line shows the standard  
 41 linear regression fit, with the shaded region giving the 95% confidence interval for the mean.

42



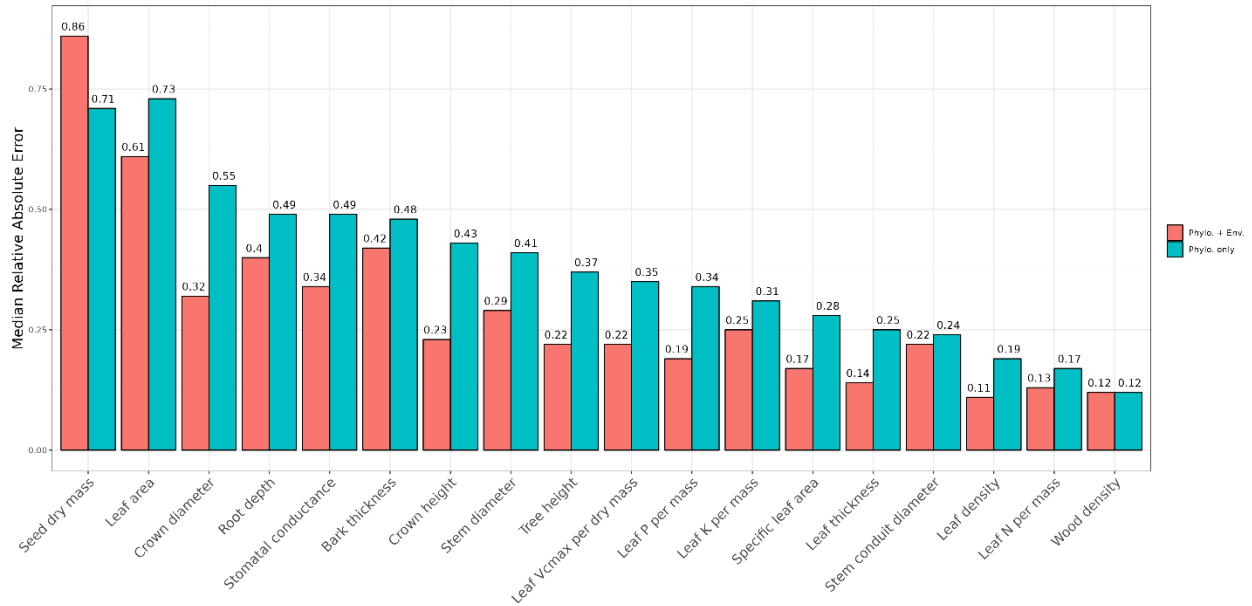

43

44 **Supplementary Figure 8.** Trait accuracy on the unlogged scale, assessed via median relative  
 45 absolute error, with phylogenetic information only (green) vs. phylogenetic and environmental  
 46 covariates included (red). Note that because most traits exhibit skewed log-normal distributions,  
 47 where the sample variance for an observation is correlated with the mean, the relative error on the  
 48 unlogged scale is largely an intrinsic artifact of the skewness of the data. Thus, regardless of the  
 49 accuracy of the models (Supplementary Fig. 6), care should be taken when using these approaches  
 50 to make inference about the unlogged trait expression of a specific tree in a specific location.

51

52

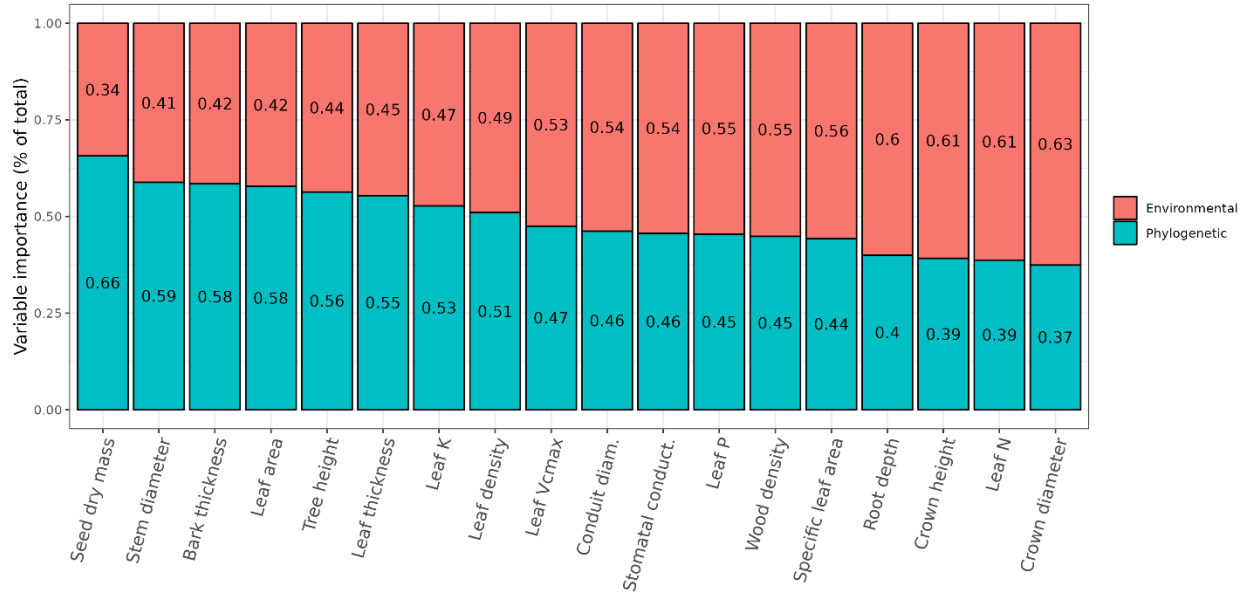

53

54 **Supplementary Figure 9.** The relative importance (scaled to 1) attributable to environmental  
 55 variables vs. phylogenetic eigenvectors as predictors of trait expression.

56

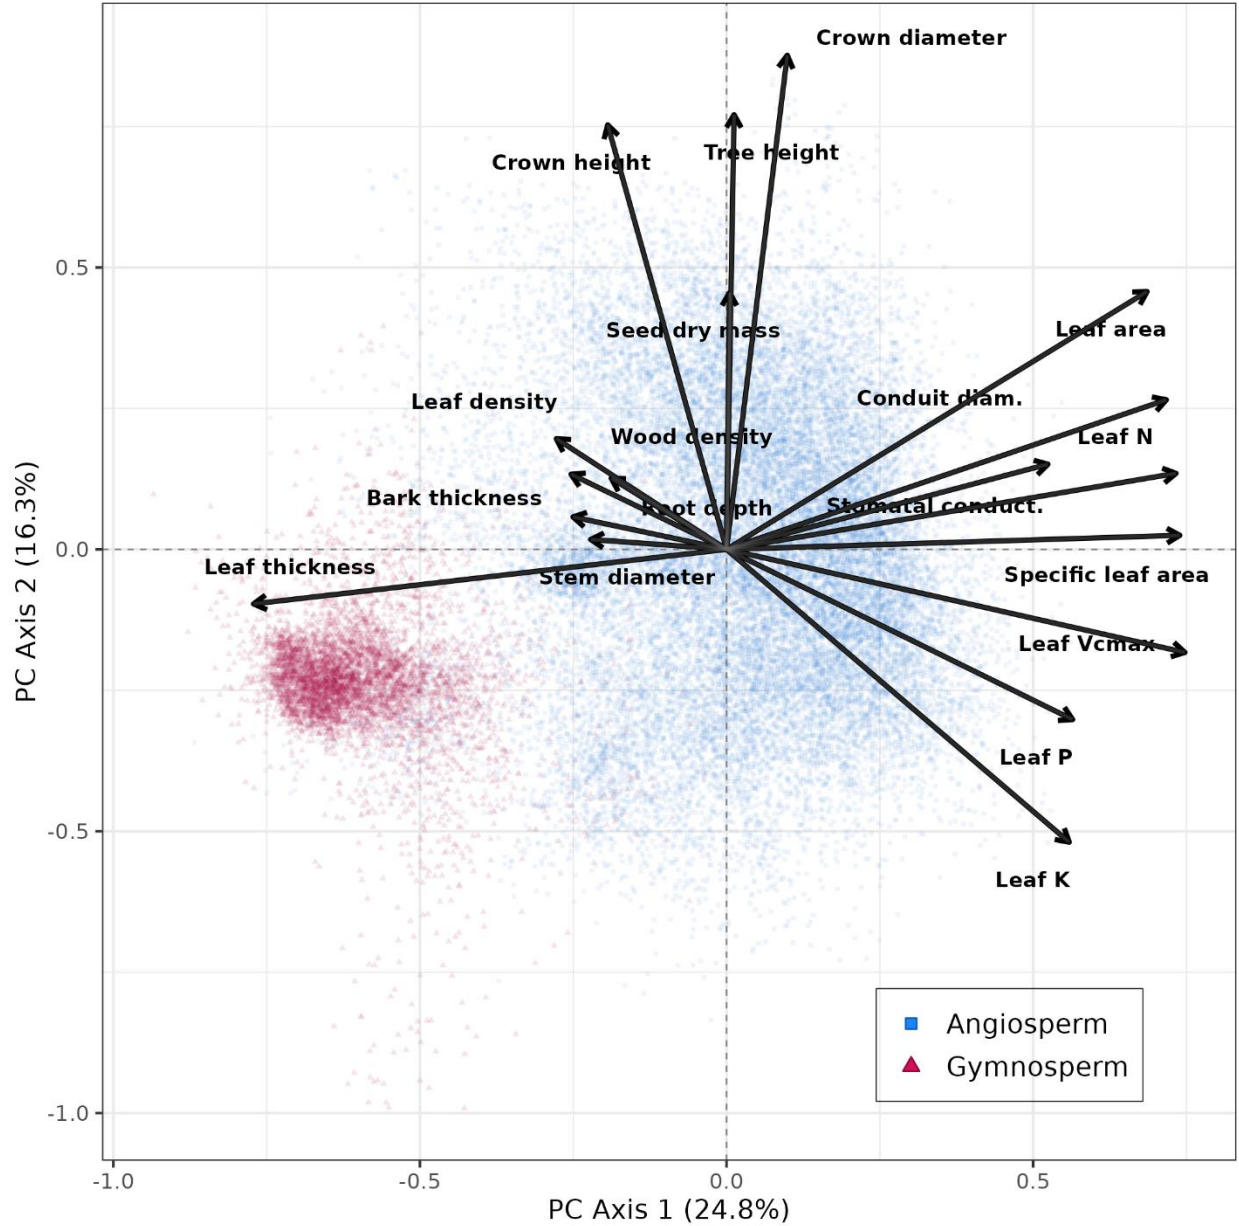

58

59 **Supplementary Figure 10.** The same PCA as in the main text (Fig. 2a), but with all trait axes  
 60 labeled. See Supplementary Table 5 for the loadings.

61

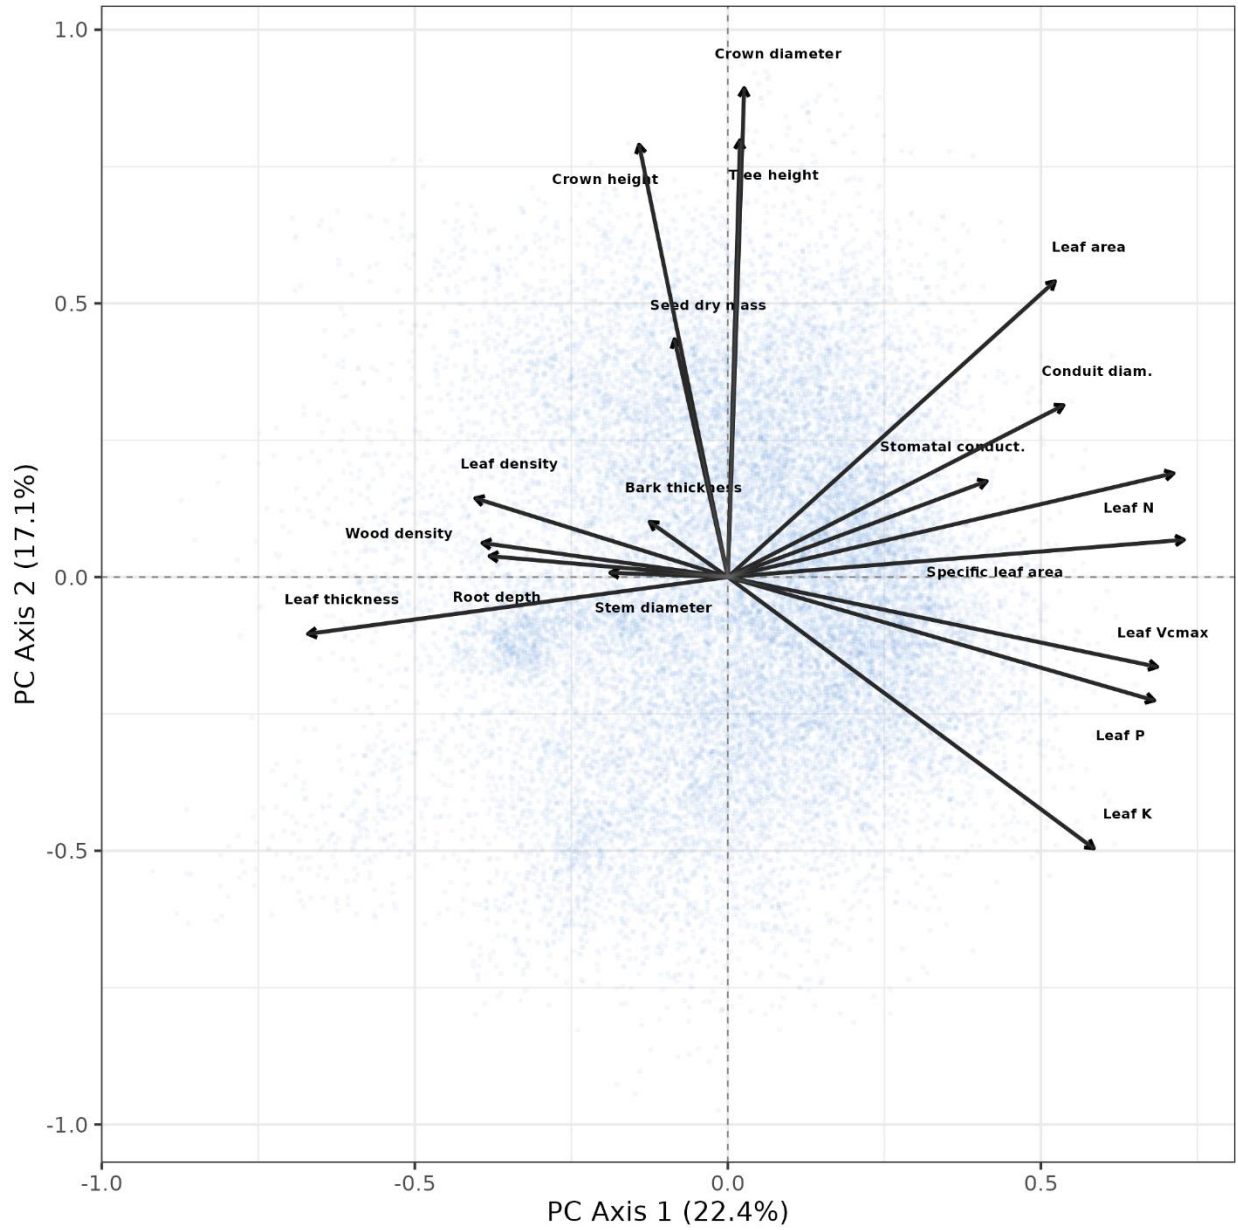

62

63 **Supplementary Figure 11.** The same PCA as in the main text (Fig. 2b), but with all trait axes  
 64 labeled. See Supplementary Data 2 for the PC loadings table.

65

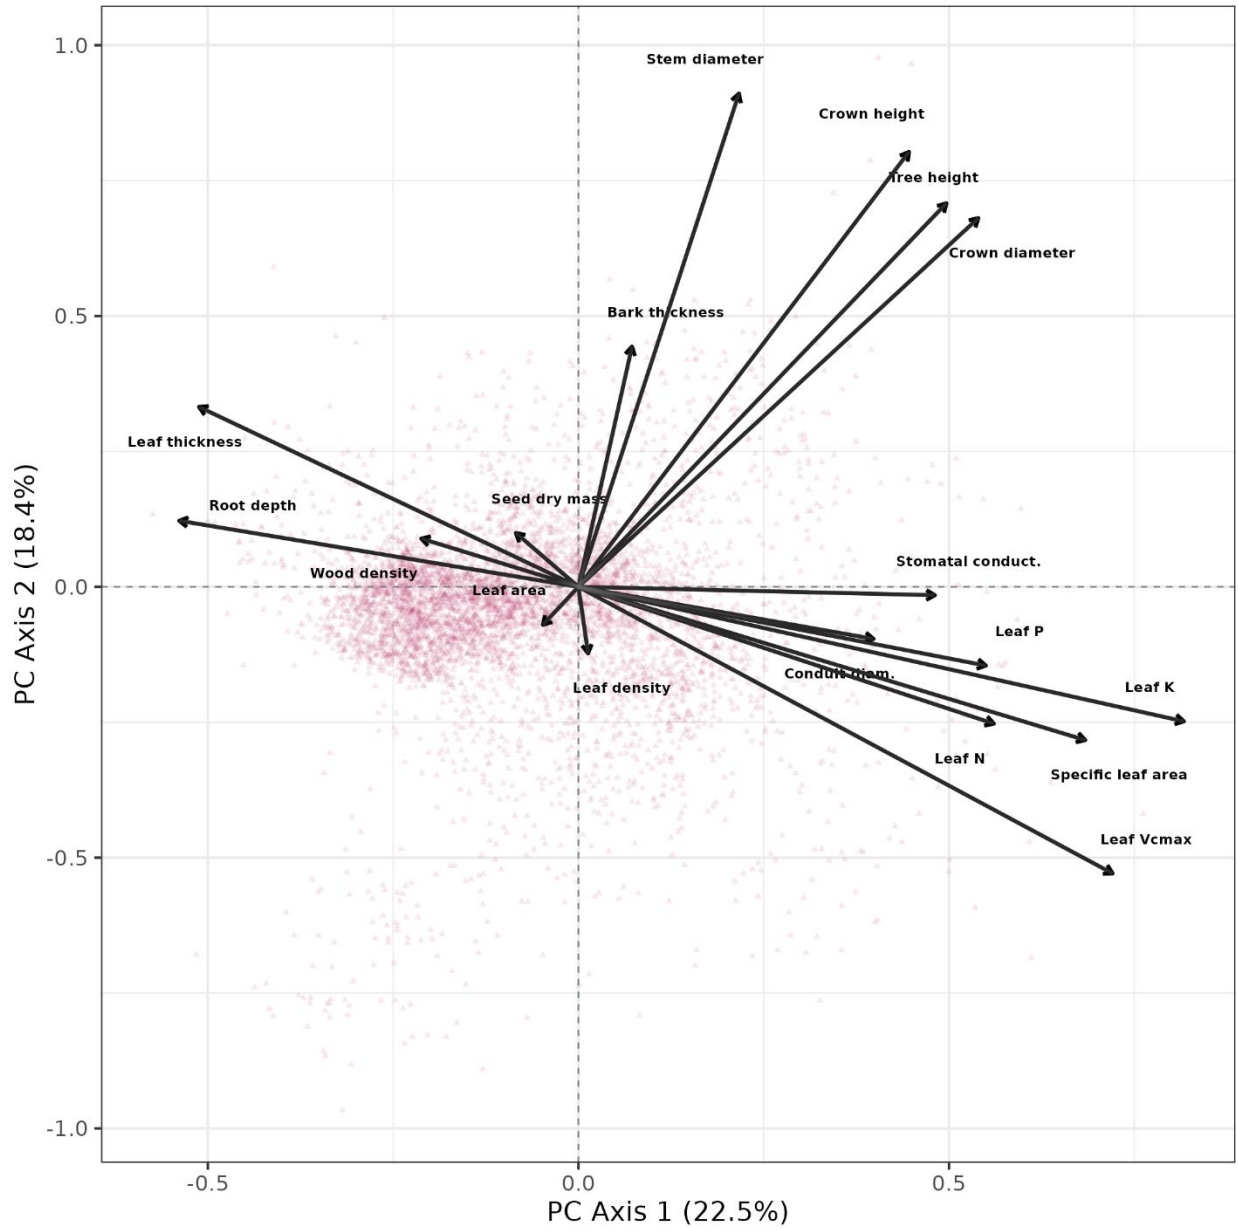

66

67 **Supplementary Figure 12.** The same PCA as in the main text (Fig. 2c), but with all trait axes  
 68 labeled. See Supplementary Data 2 for the PC loadings table.

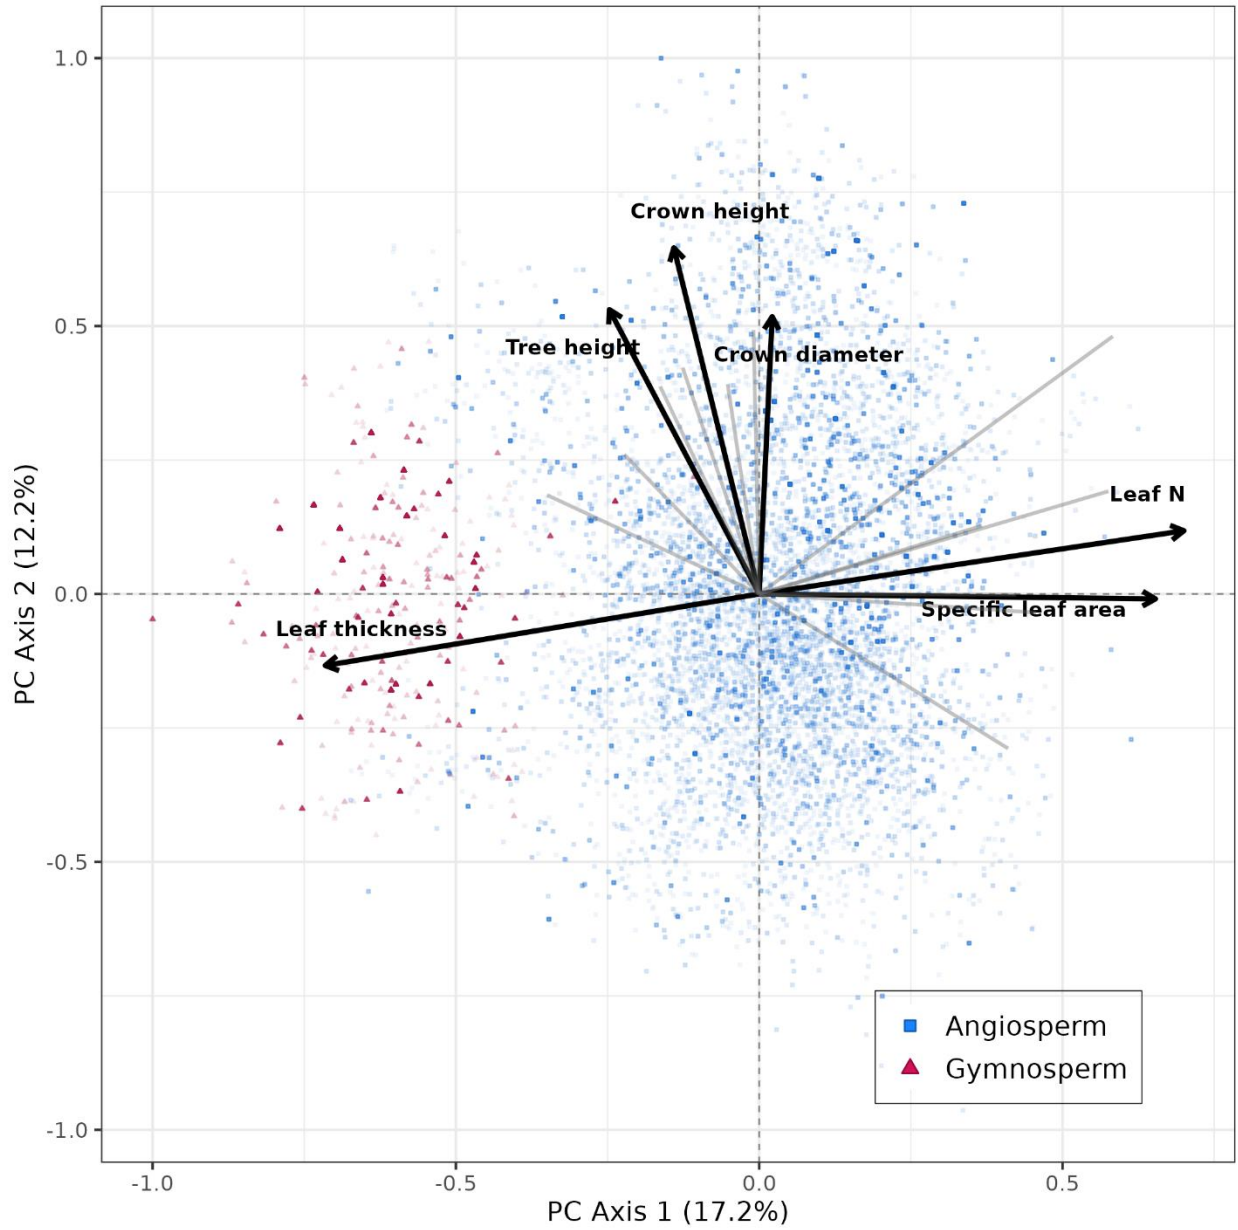

69

70 **Supplementary Figure 13.** The PCA using phylogeny-only models, showing the same trade-  
 71 offs as with the environmental + phylogeny models, despite having substantially lower predictive  
 72 accuracy of the trait models. See Supplementary Data 2 for the PC loadings table.

73

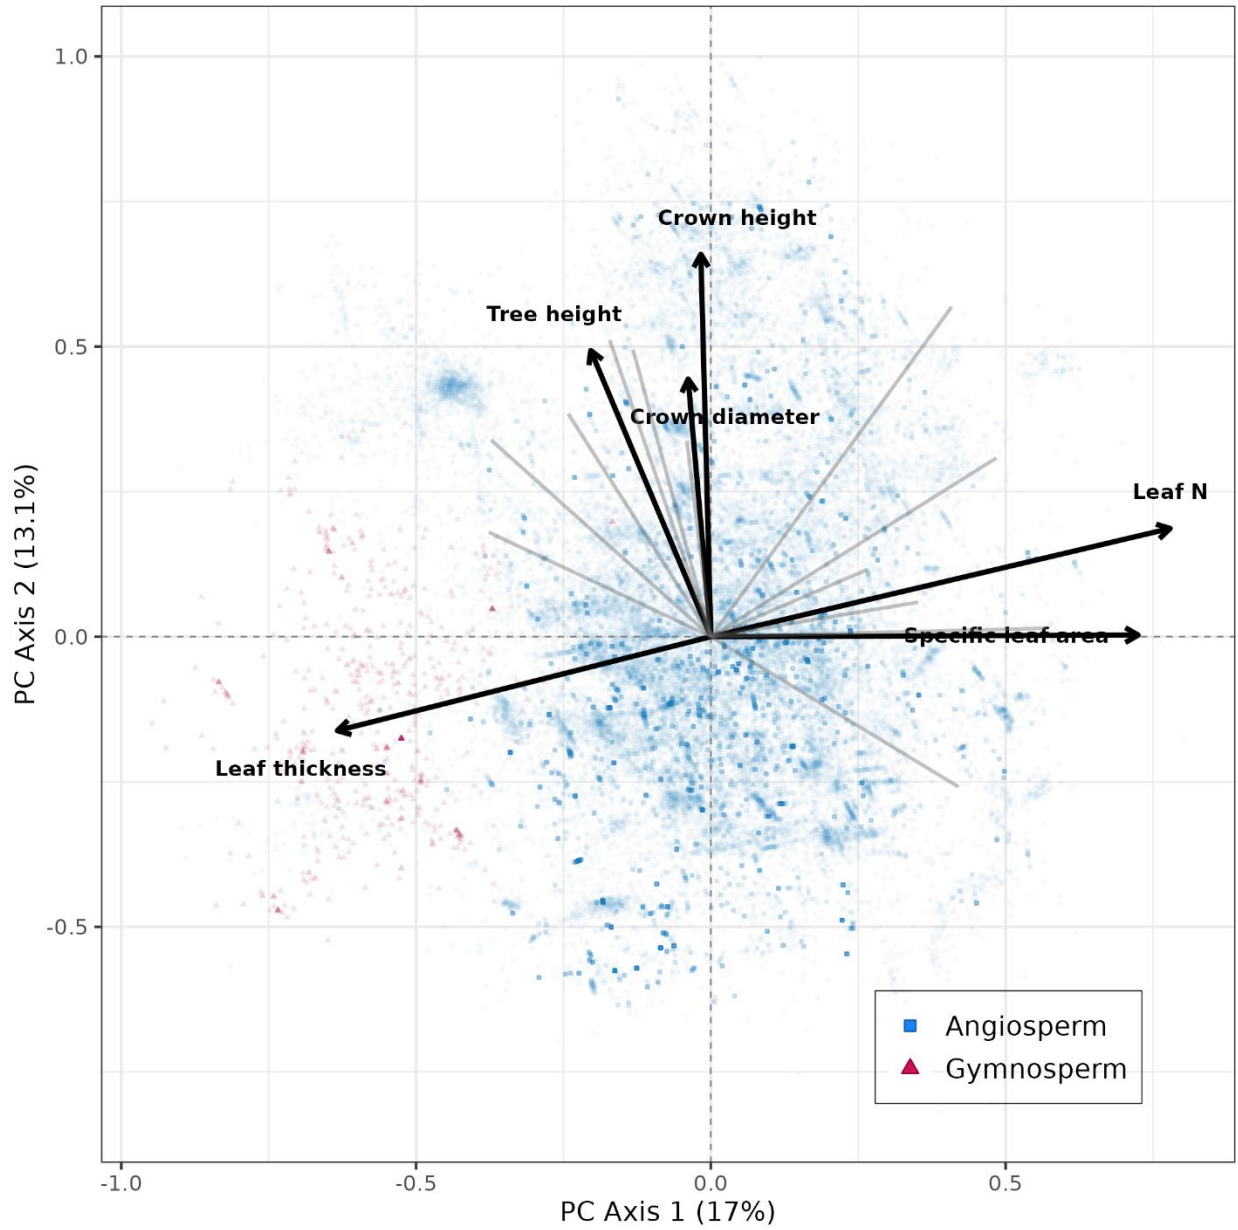

74

75 **Supplementary Figure 14.** The PCA for all 52,255 tree species matched in the reference  
 76 phylogeny, using the phylogeny-only models, showing the same trade-offs as with the subset of  
 77 species with georeferenced data. See Supplementary Data 2 for the PC loadings table.

78

79

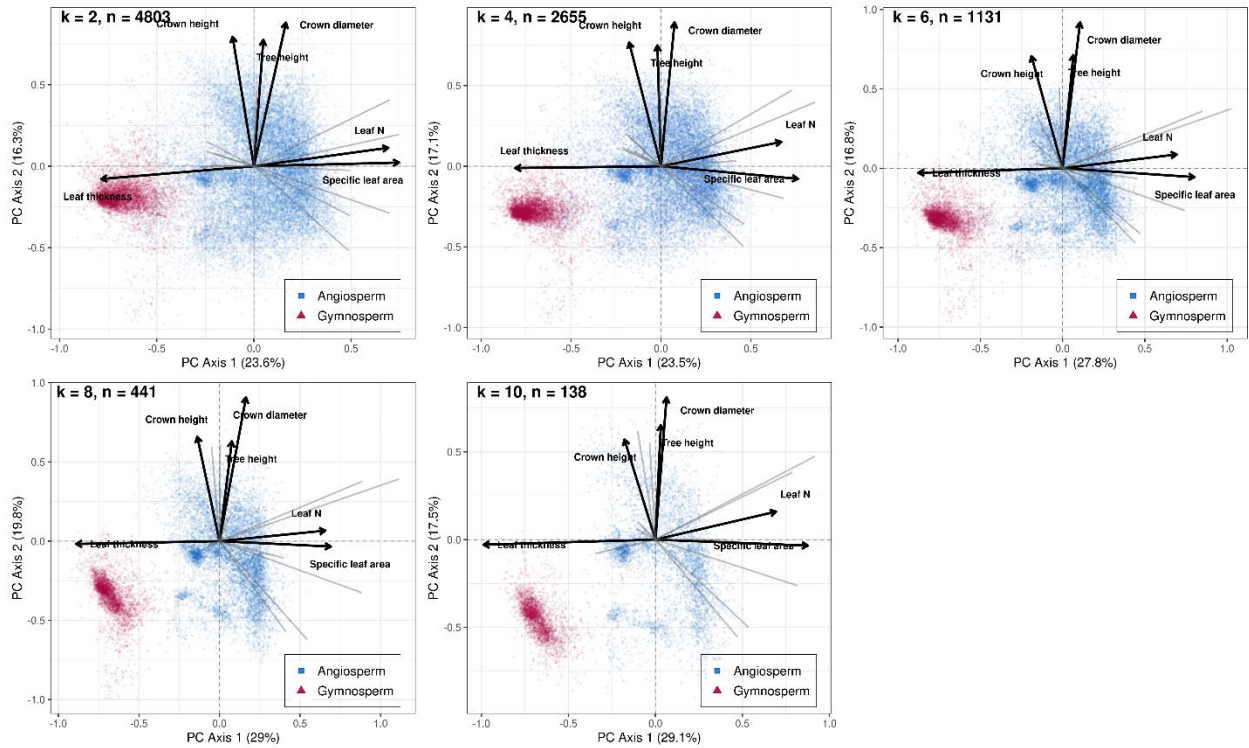

80

81 **Supplementary Figure 15.** The PCA results using decreasing levels of missingness in the  
 82 dataset, ranging from all species with at least 2 traits measured ( $n = 4803$ ), to only those with at  
 83 least 10 unique traits measurements ( $n=138$  species). The results are highly robust to the level of  
 84 missingness in the data. See Supplementary Data 2 for the PC loadings table.

85

86



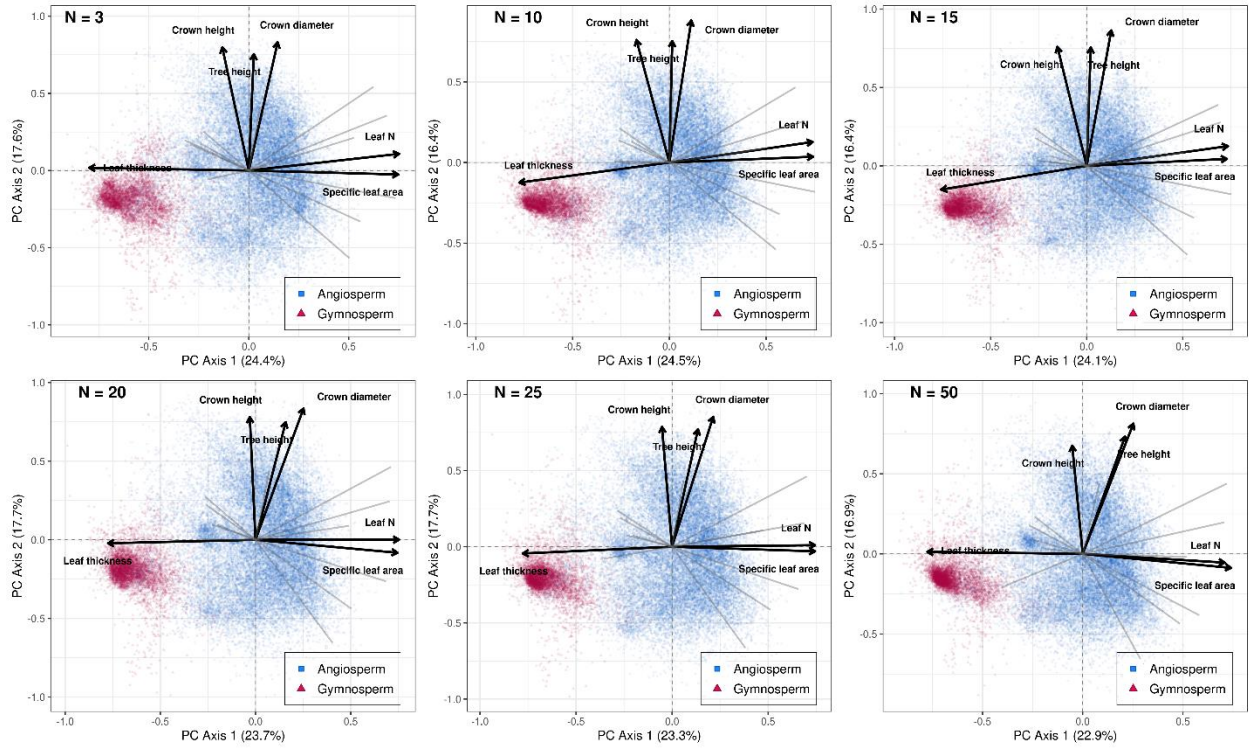

87

88 **Supplementary Figure 16.** The PCA results using increasing number of environmental  
 89 covariates, ranging from 3 to 50 (each) phylogenetic and environmental covariates. N=10 is used  
 90 throughout the main text (see Supplementary Fig. 5). The results are robust to the choice of  
 91 variables. See Supplementary Data 2 for the PC loadings table.

92

93

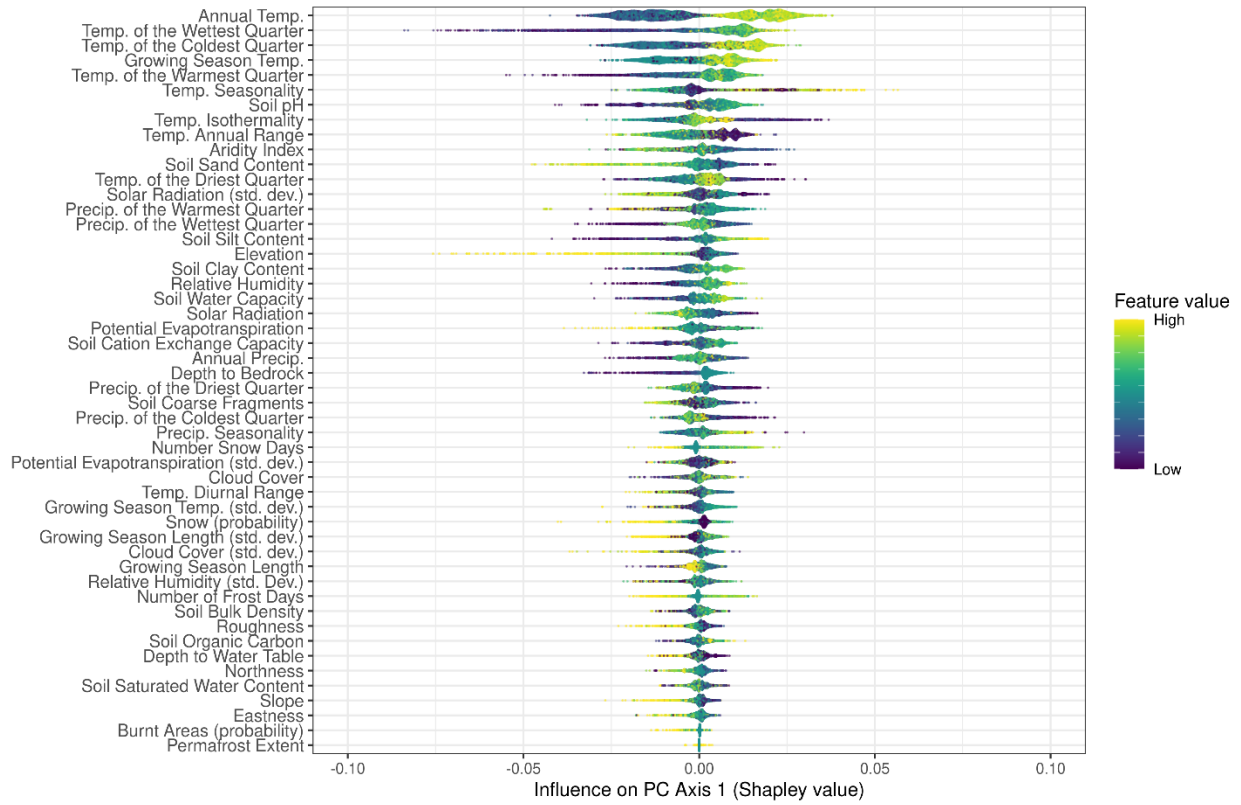

94

95

96 **Supplementary Figure 17.** The Shapley values for all 50 environmental variables' influence on  
 97 PC 1, sorted by variable importance. Note that some of these variables are highly collinear, and  
 98 thus reflect redundant patterns. See the main text for the 10 representative variables with low  
 99 correlation.

100

101

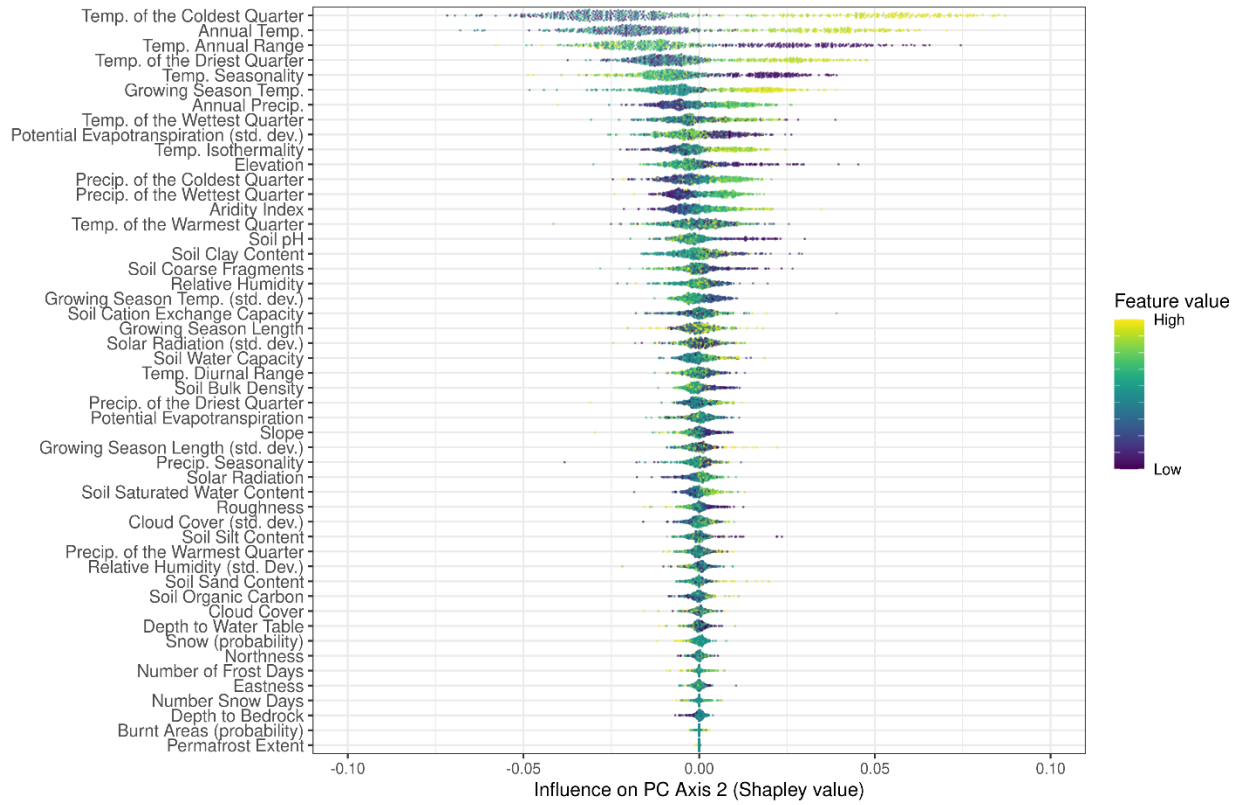

102

103 **Supplementary Figure 18.** The Shapley values for all 50 environmental variables' influence on  
 104 PC 2, sorted by variable importance. Note that some of these variables are highly collinear, and  
 105 thus reflect redundant patterns. See the main text for the 10 representative variables with low  
 106 correlation.

107

108

109

|                    | Leaf density | Wood density | Root depth | Specific leaf area | Leaf thickness | Leaf N | Leaf K | Leaf P | Conduit diam. | Leaf Vcmax | Stomatal conduct. | Leaf area | Crown height | Crown diameter | Tree height | Seed dry mass | Bark thickness | Stem diameter |
|--------------------|--------------|--------------|------------|--------------------|----------------|--------|--------|--------|---------------|------------|-------------------|-----------|--------------|----------------|-------------|---------------|----------------|---------------|
| Leaf density       |              | 0.43         | 0.2        | -0.48              | 0.23           | -0.28  | -0.31  | -0.31  | 0.06          | -0.1       | 0                 | 0.02      | 0.03         | 0.05           | -0.01       | 0.22          | 0.26           | 0.08          |
| Wood density       | 0.33         |              | 0.27       | -0.22              | 0.08           | -0.16  | -0.26  | -0.31  | -0.01         | -0.07      | 0.04              | -0.03     | 0.02         | 0.08           | -0.07       | 0.15          | 0.05           | -0.01         |
| Root depth         | 0.08         | 0.01         |            | -0.2               | 0.11           | -0.07  | -0.23  | -0.26  | 0.02          | -0.08      | -0.14             | -0.06     | -0.06        | 0.06           | -0.01       | 0.17          | 0.04           | -0.01         |
| Specific leaf area | -0.42        | -0.14        | -0.18      |                    | -0.82          | 0.55   | 0.38   | 0.45   | 0.25          | 0.44       | 0.14              | 0.37      | -0.08        | 0.08           | 0.06        | 0.01          | -0.32          | -0.29         |
| Leaf thickness     | 0.19         | 0.07         | 0.11       | -0.72              |                | -0.51  | -0.31  | -0.42  | -0.26         | -0.41      | -0.1              | -0.36     | 0.04         | -0.1           | -0.06       | -0.1          | 0.35           | 0.29          |
| Leaf N             | -0.24        | -0.09        | -0.1       | 0.39               | -0.31          |        | 0.42   | 0.52   | 0.47          | 0.48       | 0.32              | 0.34      | 0.05         | 0.21           | 0.11        | 0.07          | -0.18          | -0.14         |
| Leaf K             | -0.17        | -0.1         | -0.11      | 0.26               | -0.22          | 0.27   |        | 0.71   | 0.26          | 0.56       | 0.25              | 0.04      | -0.43        | -0.41          | -0.36       | -0.22         | -0.07          | -0.01         |
| Leaf P             | -0.22        | -0.14        | -0.16      | 0.32               | -0.3           | 0.34   | 0.58   |        | 0.29          | 0.51       | 0.22              | 0.1       | -0.17        | -0.21          | -0.14       | -0.1          | -0.02          | 0.01          |
| Conduit diam.      | 0.15         | 0.08         | 0.03       | 0.02               | 0.01           | 0.09   | 0.06   | 0.04   |               | 0.64       | 0.59              | 0.62      | -0.06        | 0.21           | 0.1         | 0.12          | 0.24           | 0.11          |
| Leaf Vcmax         | 0.01         | 0.07         | 0          | 0.3                | -0.27          | 0.22   | 0.33   | 0.26   | 0.44          |            | 0.51              | 0.45      | -0.31        | -0.15          | -0.21       | -0.15         | 0.15           | 0.12          |
| Stomatal conduct.  | 0.1          | 0.14         | -0.15      | -0.02              | 0.04           | 0.07   | 0.06   | 0.08   | 0.39          | 0.31       |                   | 0.45      | -0.05        | 0.14           | 0.1         | -0.05         | 0.18           | 0.09          |
| Leaf area          | 0.09         | 0.11         | -0.06      | 0.15               | -0.12          | 0.05   | -0.16  | -0.1   | 0.54          | 0.31       | 0.31              |           | 0.08         | 0.37           | 0.26        | 0.13          | 0.11           | -0.05         |
| Crown height       | -0.06        | -0.06        | -0.21      | -0.07              | 0.06           | 0.08   | -0.3   | -0.14  | -0.14         | -0.33      | 0.05              | 0.06      |              | 0.78           | 0.64        | 0.23          | 0.03           | 0.14          |
| Crown diameter     | -0.05        | -0.03        | -0.19      | 0.04               | -0.03          | 0.11   | -0.33  | -0.18  | 0.06          | -0.2       | 0.14              | 0.29      | 0.74         |                | 0.7         | 0.3           | -0.06          | -0.03         |
| Tree height        | -0.06        | -0.09        | -0.11      | 0.02               | -0.01          | 0.04   | -0.29  | -0.12  | 0.01          | -0.24      | 0.14              | 0.16      | 0.52         | 0.58           |             | 0.28          | 0.03           | 0.14          |
| Seed dry mass      | 0.02         | -0.01        | 0.03       | -0.02              | 0.01           | -0.03  | -0.03  | -0.02  | 0             | -0.06      | 0.01              | 0.02      | 0.04         | 0.04           | 0.03        |               | -0.05          | -0.11         |
| Bark thickness     | 0.27         | 0.17         | 0.03       | -0.22              | 0.21           | -0.08  | -0.03  | -0.04  | 0.52          | 0.25       | 0.31              | 0.29      | -0.05        | -0.01          | 0.06        | -0.01         |                | 0.51          |
| Stem diameter      | 0            | -0.03        | -0.04      | -0.2               | 0.22           | -0.1   | -0.06  | -0.01  | 0.15          | 0.02       | 0.12              | 0.04      | 0.2          | 0.09           | 0.25        | -0.02         | 0.37           |               |

110

111 **Supplementary Figure 19.** The full set of correlations between the imputed trait values. The  
 112 upper triangle gives the Spearman correlation between imputed values; the lower triangle gives  
 113 the correlation between phylogenetic independent contrasts, thereby controlling for highly  
 114 related species with similar phylogenetic histories.

115

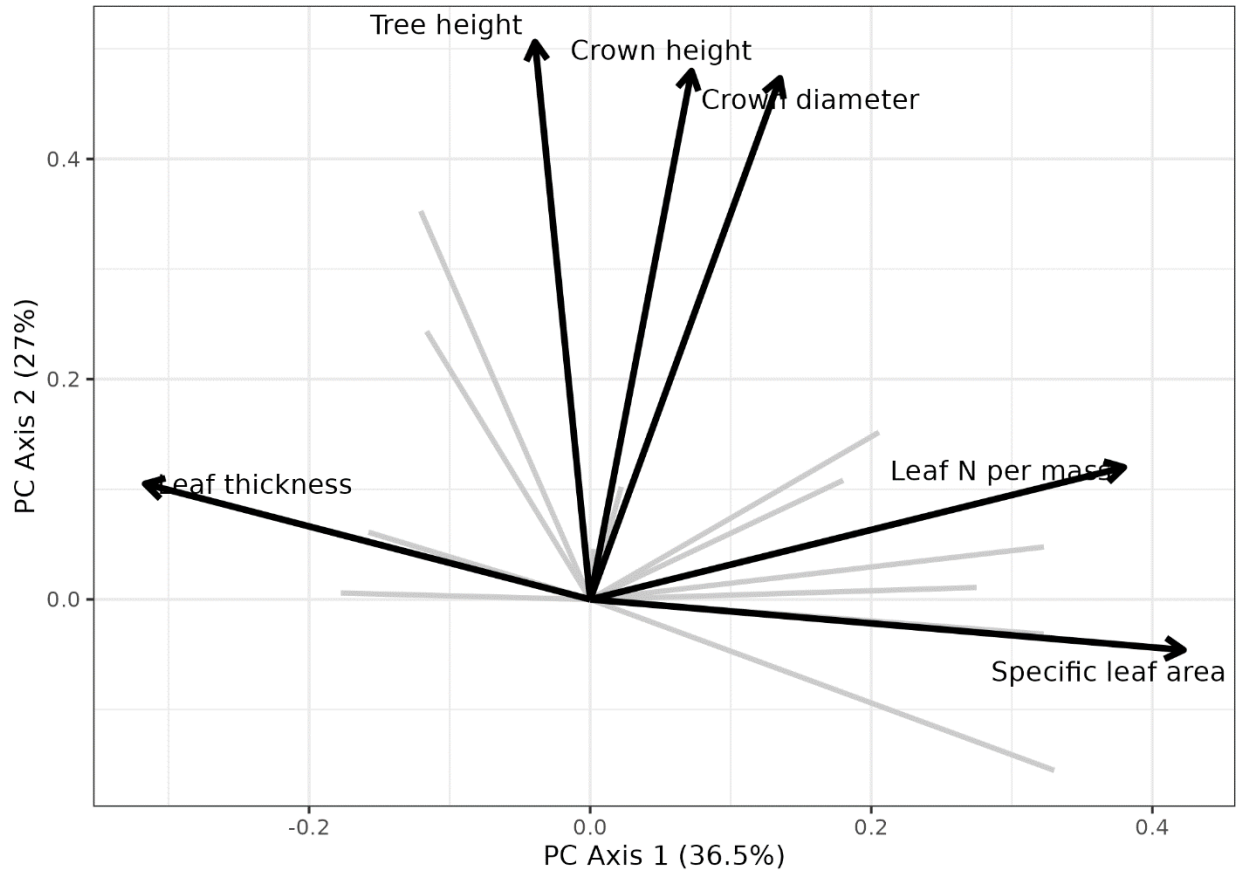

116

117 **Supplementary Figure 20.** The PCA using raw data only. Since PCA is implemented via  
 118 calculating the eigenvectors of the correlation matrix, we can recreate this PCA using only the  
 119 raw data. Here, we calculated the correlations using only the pairwise complete raw observations  
 120 for each pair of traits. We then took the eigen-decomposition of this correlation matrix, with the  
 121 first two eigenvectors show here, along with % variation. Using raw data only, we see the  
 122 identical 6 traits load most heavily on the two axes.

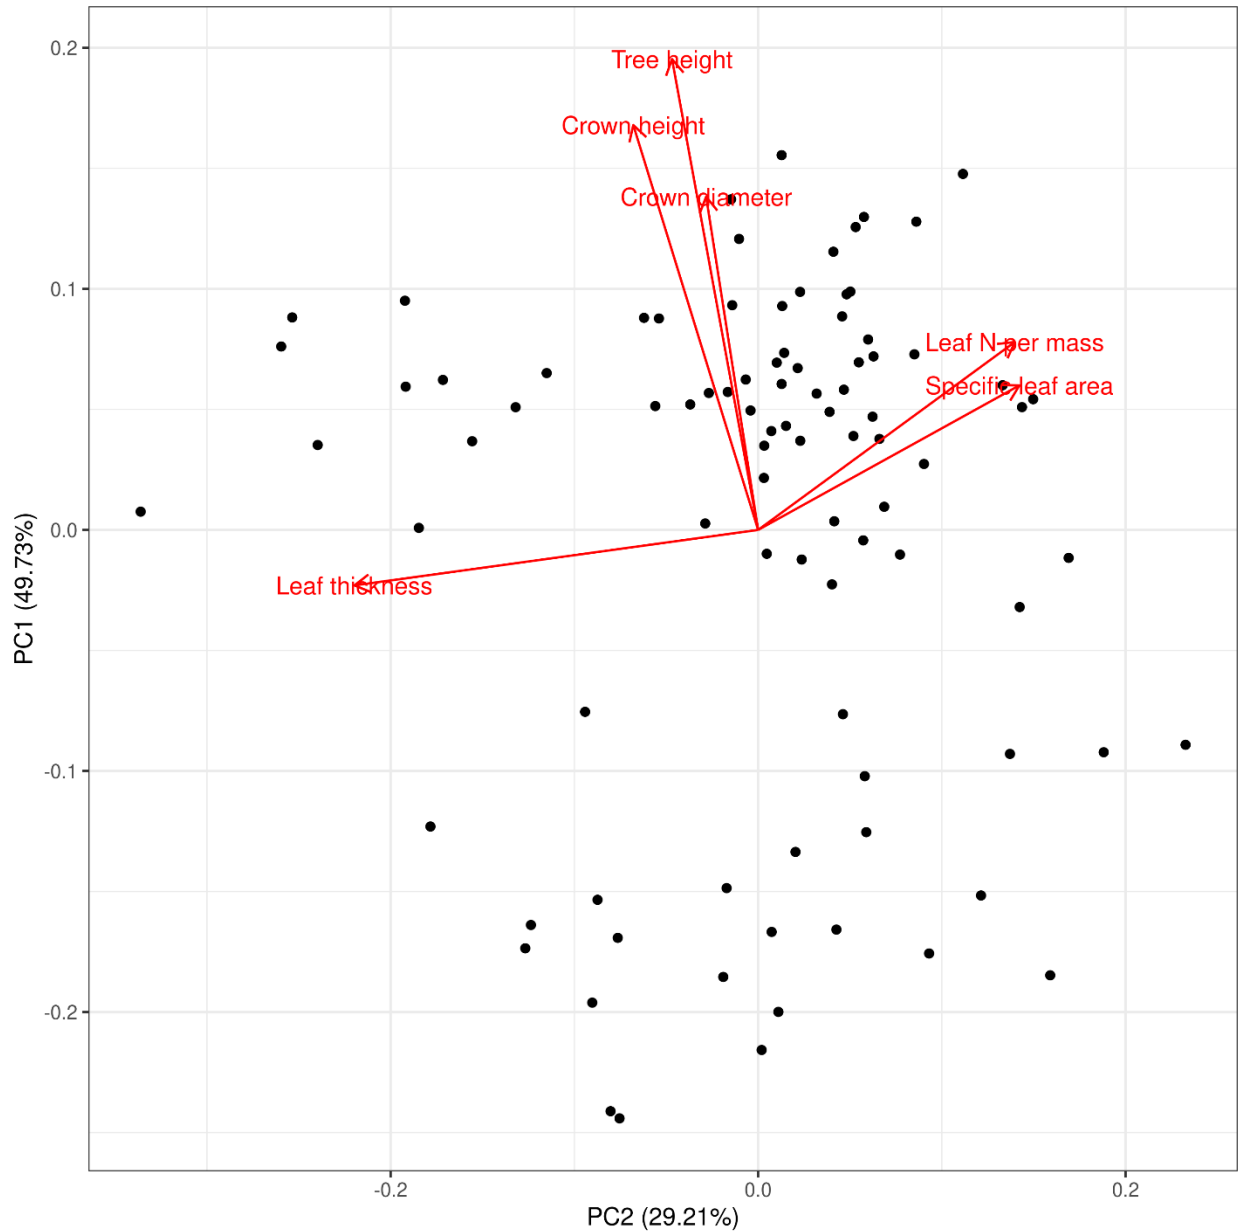

124

125 **Supplementary Figure 21.** The PCA results when restricted to the 91 species which have  
 126 complete trait values for the six dominant traits underpinning the PC axes in the full dataset.  
 127 Using this small subset of data, we see the same orthogonality of the trait axes. Moreover, we  
 128 recover the same environmental patterns using these PC results (Supplementary Fig. 22).

129

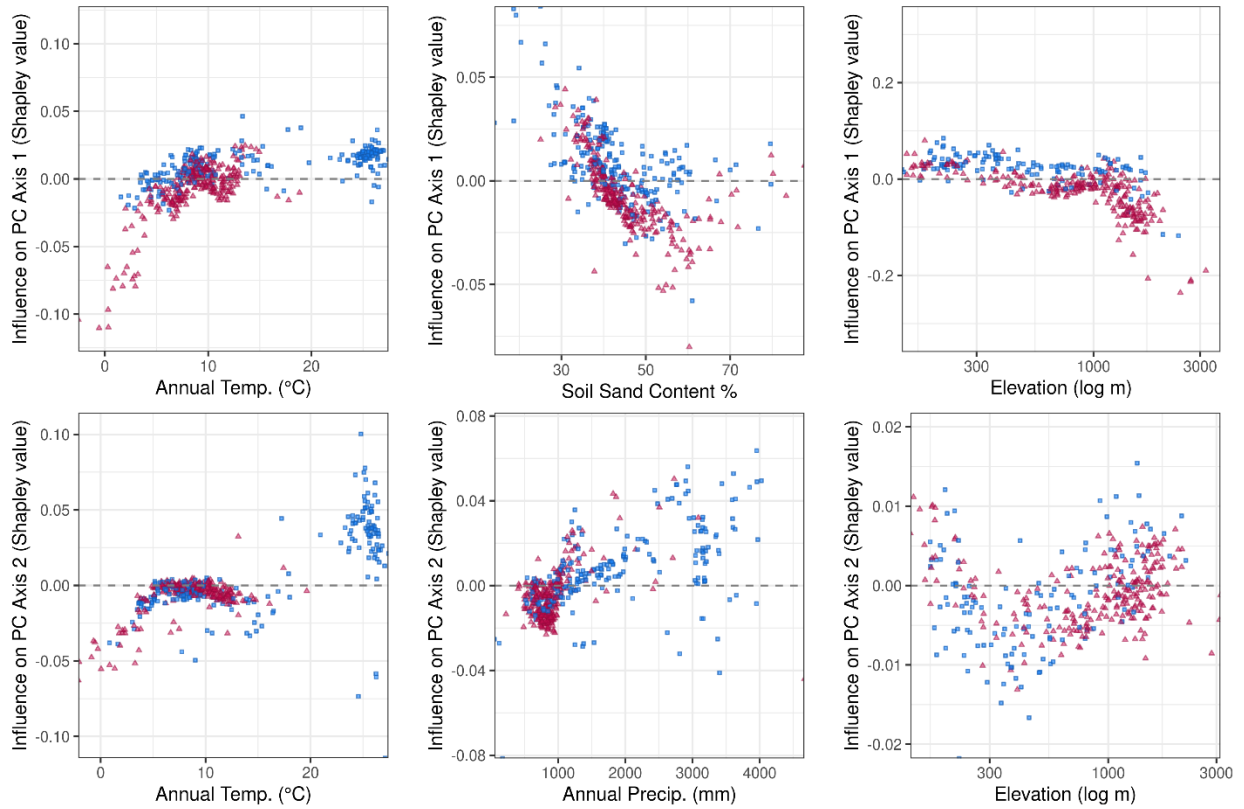

130

131 **Supplementary Figure 22.** The relationships between the first two PC axes and the dominant  
 132 environmental drivers shown in the main text, obtained using raw data only, using the 91 species  
 133 and 3319 observations where we had complete data for the dominant 6 traits underpinning the  
 134 PC axes (see Supplementary Fig. 21).

135

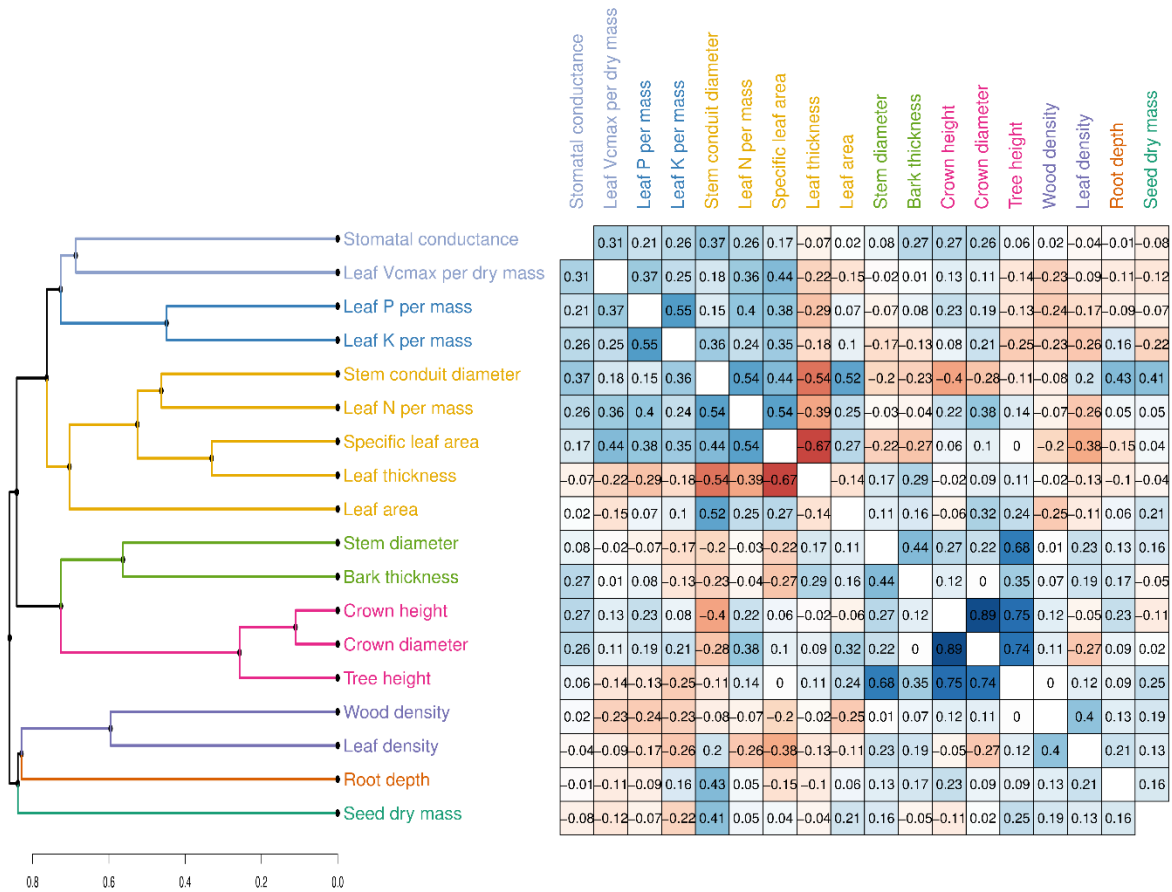

136

137 **Supplementary Figure 23.** The functional dendrogram obtained using pairwise-complete raw  
 138 observations. The results show nearly the identical trends and relationships to the full set of  
 139 imputed data, despite being species-level averages.



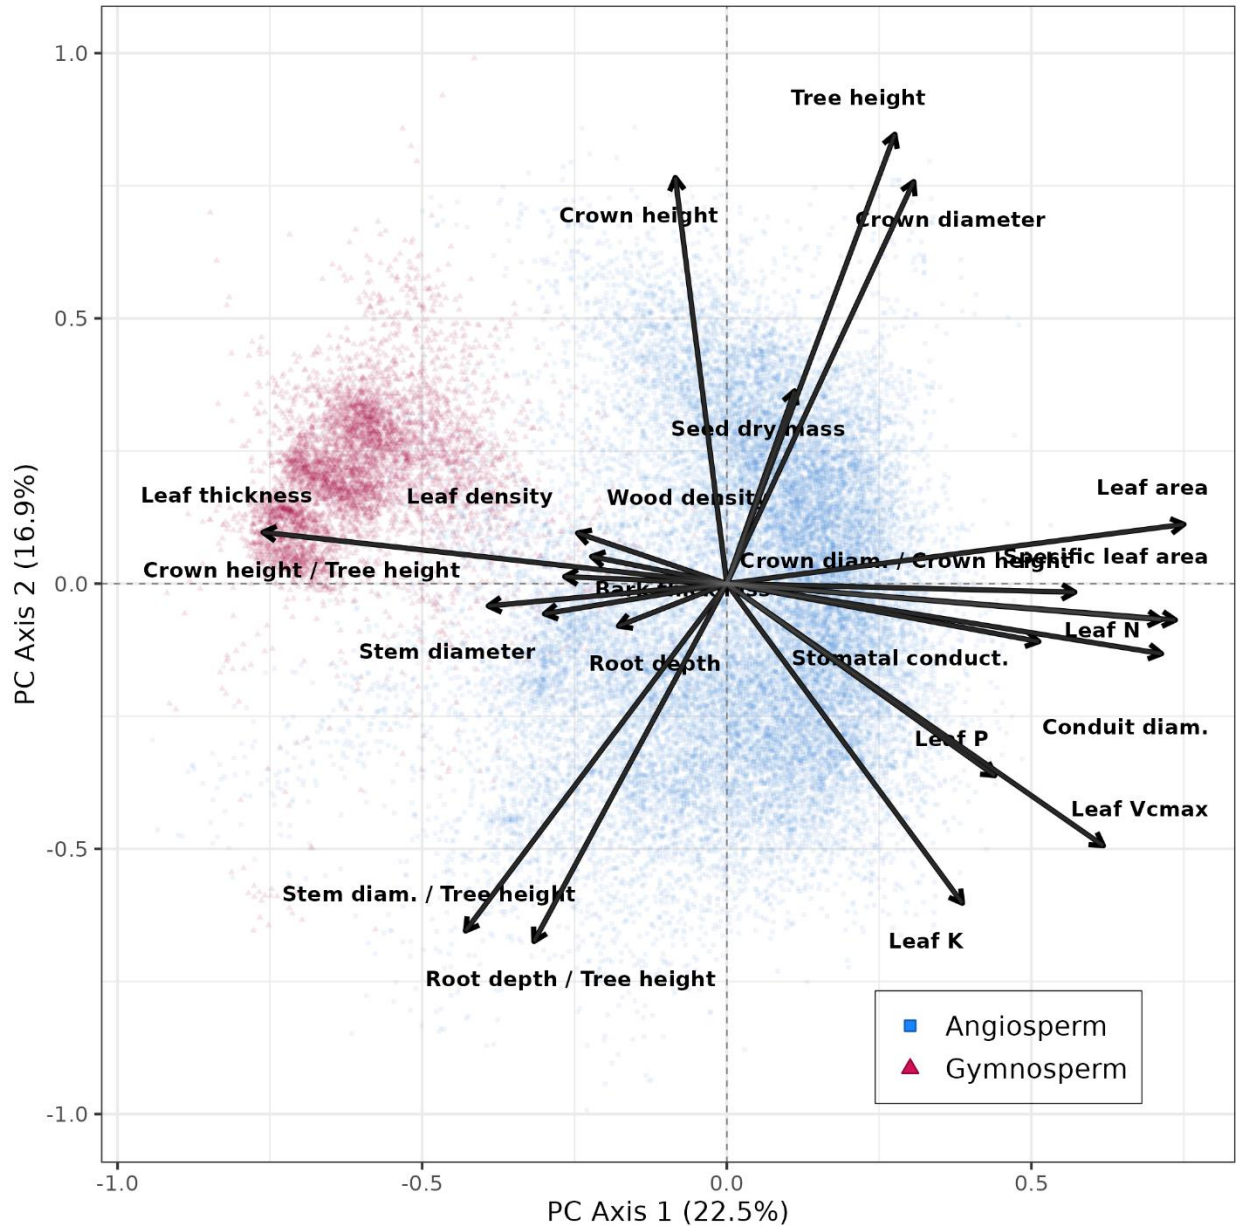

140

141 **Supplementary Figure 24.** The trait PC when adding four allometric relationship estimated  
 142 using the imputed data (crown height / tree height; stem diameter / tree height; root depth / tree  
 143 height, crown diameter / crown height). The dominant axes and representative traits are  
 144 unchanged, highlighting that these allometric ratios contribute no new information to the  
 145 dominant axes underpinning trait relationships. Note that these allometric ratios are estimated  
 146 and their accuracy cannot be assessed directly, and so caution should be exercised when  
 147 interpreting them.

148

149

150

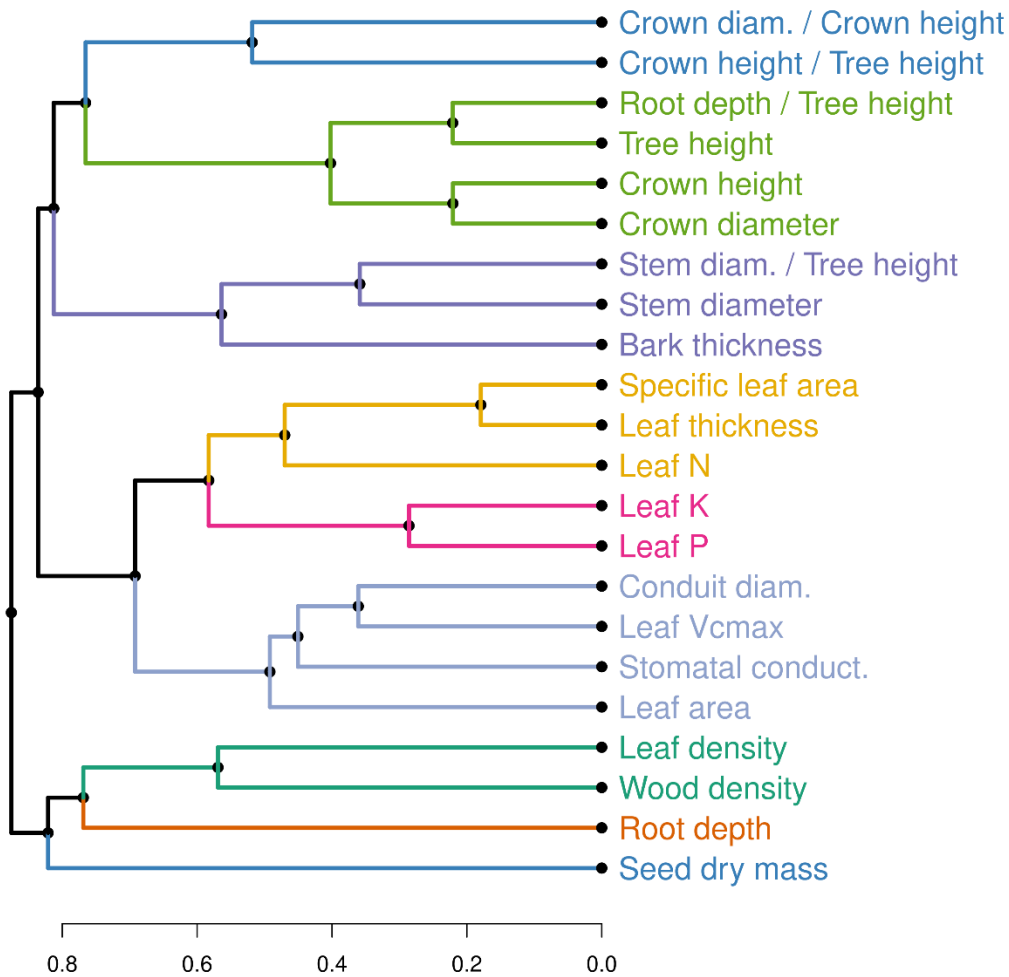

151

152 **Supplementary Figure 25.** The functional dendrogram when four allometric ratios  
 153 (Supplementary Fig. 24) are added to the dataset. The ratios “root depth / tree height” and “stem  
 154 diam. / tree height” ratio join within existing groups, whereas “crown diam. / crown height” and  
 155 “crown height. / tree height” form their own unique cluster reflecting crown architecture. Note  
 156 that these allometric ratios are estimated and their accuracy cannot be assessed directly, and so  
 157 caution should be exercised when interpreting them.

158

159 **Supplementary Table 1.** The number of observations per trait by continental region, with the  
 160 percentage in parentheses denoting the proportion of these observations taken on angiosperm  
 161 species. For reference, angiosperms account for ~99% of all extant tree species<sup>20,21</sup>.

| Trait                   | Global        | South America  | Eurasia       | Africa        | Oceania       | North America | No spatial coords. |
|-------------------------|---------------|----------------|---------------|---------------|---------------|---------------|--------------------|
| All                     | 491001 (85%)  | 200578 (99.8%) | 94585 (57.8%) | 16736 (99.6%) | 15036 (92.8%) | 61755 (62.4%) | 102311 (91.2%)     |
| Bark thickness          | 6786 (73.4%)  | 3945 (99.5%)   | 390 (97.7%)   | 86 (100%)     | 303 (93.1%)   | 1484 (14.7%)  | 578 (15.1%)        |
| Crown diameter          | 4293 (68.3%)  | 939 (100%)     | 1373 (70.6%)  | 862 (100%)    | 64 (100%)     | 1043 (8.1%)   | 12 (100%)          |
| Crown height            | 5218 (57.6%)  | 1035 (99.8%)   | 2430 (63.3%)  | 112 (100%)    | 101 (100%)    | 1486 (11.9%)  | 54 (83.3%)         |
| Leaf area               | 14002 (96.9%) | 5476 (100%)    | 2668 (96.1%)  | 444 (100%)    | 770 (100%)    | 4329 (93.1%)  | 315 (88.9%)        |
| Leaf density            | 21810 (97.6%) | 17041 (100%)   | 862 (83.9%)   | 648 (100%)    | 479 (96.5%)   | 2055 (81.8%)  | 725 (100%)         |
| Leaf K per mass         | 7204 (75.2%)  | 2543 (100%)    | 1253 (89.1%)  | 430 (100%)    | 2 (50%)       | 1597 (12.5%)  | 1379 (81.7%)       |
| Leaf N per mass         | 60617 (81.2%) | 21752 (99.6%)  | 17410 (67.8%) | 2815 (99.4%)  | 2287 (88.2%)  | 9719 (67.1%)  | 6634 (66.1%)       |
| Leaf P per mass         | 26411 (73.3%) | 7552 (99.9%)   | 10152 (62.5%) | 821 (100%)    | 1023 (93.7%)  | 2535 (31.7%)  | 4328 (66.6%)       |
| Leaf thickness          | 55497 (98.3%) | 42351 (100%)   | 1326 (85.7%)  | 6412 (100%)   | 486 (99%)     | 3575 (79.9%)  | 1347 (98.1%)       |
| Leaf Vcmax per dry mass | 2028 (91%)    | 561 (98.9%)    | 322 (66.5%)   | 674 (100%)    | 193 (77.2%)   | 154 (84.4%)   | 124 (99.2%)        |
| Root depth              | 2346 (68.6%)  | 151 (100%)     | 396 (51%)     | 466 (97%)     | 82 (63.4%)    | 604 (46.9%)   | 647 (72.6%)        |
| Seed dry mass           | 42650 (96.2%) | 291 (100%)     | 100 (88%)     | 28 (100%)     | 38 (97.4%)    | 96 (85.4%)    | 42097 (96.2%)      |
| Specific leaf area      | 70968 (90.6%) | 26810 (99.7%)  | 16459 (82%)   | 2109 (99%)    | 3286 (92.6%)  | 17220 (82.5%) | 5084 (93.7%)       |
| Stem conduit diameter   | 508 (68.5%)   | 179 (99.4%)    | 113 (46%)     | 20 (95%)      | 24 (62.5%)    | 168 (48.2%)   | 4 (75%)            |
| Stem diameter           | 53168 (85.6%) | 36422 (99.9%)  | 7550 (72.3%)  | 220 (90.9%)   | 829 (86%)     | 7995 (33.6%)  | 152 (57.2%)        |
| Stomatal conductance    | 29084 (39.6%) | 1491 (98.3%)   | 18778 (14.8%) | 30 (100%)     | 3772 (96.9%)  | 4401 (67.2%)  | 612 (99.7%)        |
| Tree height             | 41865 (84.9%) | 25718 (99.7%)  | 6276 (45.7%)  | 251 (100%)    | 1259 (89.8%)  | 2584 (45.8%)  | 5777 (77.2%)       |
| Wood density            | 46546 (88.7%) | 6321 (99.4%)   | 6727 (43.7%)  | 308 (100%)    | 38 (63.2%)    | 710 (48.3%)   | 32442 (96.8%)      |

162

163

164

165 **Supplementary Table 2.** The number of species per trait by continental region, with the  
 166 percentage in parentheses denoting the proportion of these species that are angiosperms. For  
 167 reference, angiosperms account for ~99% of all extant tree species<sup>20,21</sup>.

| Trait                   | Global        | South America | Eurasia      | Africa      | Oceania     | North America | No spatial coords. |
|-------------------------|---------------|---------------|--------------|-------------|-------------|---------------|--------------------|
| All                     | 13189 (96.9%) | 3559 (99.1%)  | 2063 (93.5%) | 597 (98.5%) | 585 (92.8%) | 542 (83.8%)   | 10644 (96.3%)      |
| Bark thickness          | 1134 (80.8%)  | 725 (97.8%)   | 70 (90%)     | 9 (100%)    | 131 (84.7%) | 34 (47.1%)    | 196 (6.6%)         |
| Crown diameter          | 182 (87.9%)   | 58 (100%)     | 85 (92.9%)   | 19 (100%)   | 2 (100%)    | 19 (10.5%)    | 2 (100%)           |
| Crown height            | 289 (88.9%)   | 111 (98.2%)   | 148 (92.6%)  | 1 (100%)    | 8 (100%)    | 22 (13.6%)    | 3 (66.7%)          |
| Leaf area               | 733 (94.4%)   | 327 (100%)    | 165 (91.5%)  | 56 (100%)   | 4 (100%)    | 49 (93.9%)    | 289 (87.9%)        |
| Leaf density            | 1566 (97.6%)  | 918 (100%)    | 186 (90.9%)  | 93 (100%)   | 119 (95%)   | 169 (90.5%)   | 145 (100%)         |
| Leaf K per mass         | 1587 (96.2%)  | 658 (100%)    | 385 (95.6%)  | 127 (100%)  | 2 (50%)     | 132 (93.2%)   | 391 (88.7%)        |
| Leaf N per mass         | 4777 (96.9%)  | 2309 (99.4%)  | 1356 (94.8%) | 425 (99.1%) | 261 (96.2%) | 356 (85.7%)   | 1037 (91.2%)       |
| Leaf P per mass         | 3165 (96%)    | 1253 (99.8%)  | 989 (93.7%)  | 233 (100%)  | 195 (95.9%) | 203 (83.7%)   | 1020 (92.1%)       |
| Leaf thickness          | 1942 (97.6%)  | 1133 (99.8%)  | 282 (92.6%)  | 127 (100%)  | 124 (96%)   | 215 (90.7%)   | 310 (97.7%)        |
| Leaf Vcmax per dry mass | 550 (94.9%)   | 323 (98.5%)   | 50 (82%)     | 42 (100%)   | 99 (96%)    | 36 (72.2%)    | 21 (95.2%)         |
| Root depth              | 794 (83.5%)   | 60 (100%)     | 132 (48.5%)  | 103 (94.2%) | 19 (89.5%)  | 95 (74.7%)    | 554 (79.1%)        |
| Seed dry mass           | 5468 (95.1%)  | 285 (100%)    | 50 (84%)     | 28 (100%)   | 35 (97.1%)  | 41 (70.7%)    | 5327 (94.9%)       |
| Specific leaf area      | 4896 (97.2%)  | 2497 (99.4%)  | 1362 (96%)   | 275 (98.9%) | 414 (96.1%) | 441 (85.3%)   | 551 (88.6%)        |
| Stem conduit diameter   | 259 (72.6%)   | 70 (98.6%)    | 60 (60%)     | 18 (94.4%)  | 21 (71.4%)  | 94 (54.3%)    | 4 (75%)            |
| Stem diameter           | 2063 (96.4%)  | 1509 (99.7%)  | 433 (92.4%)  | 41 (97.6%)  | 25 (96%)    | 89 (60.7%)    | 55 (65.5%)         |
| Stomatal conductance    | 915 (94.4%)   | 508 (98.4%)   | 129 (89.9%)  | 7 (100%)    | 144 (96.5%) | 136 (80.1%)   | 25 (96%)           |
| Tree height             | 3313 (92.6%)  | 1154 (99.7%)  | 378 (89.7%)  | 75 (100%)   | 154 (91.6%) | 127 (71.7%)   | 1865 (87.6%)       |
| Wood density            | 7491 (96.6%)  | 1256 (99.5%)  | 211 (86.3%)  | 62 (100%)   | 34 (67.6%)  | 121 (57.9%)   | 6858 (96.7%)       |

168

169

170

171

172

173 **Supplementary Table 3.** The 30 functional traits and corresponding TRY trait IDs and sub-trait IDs. Of  
 174 these 30 putative traits, the 18 traits used in final the analysis (indicated with \*) were selected based on  
 175 uniqueness, consistency of assay conditions, taxonomic coverage, geographic coverage, and overall  
 176 sample size. Note that several traits (e.g., Trait 4, wood density) have multiple corresponding sub-trait  
 177 IDs. Data are included from more than 130 publications (Supplementary Data 1).

| TRY Trait ID | Sub-trait Data IDs        | Trait Name                                                                            |
|--------------|---------------------------|---------------------------------------------------------------------------------------|
| 4*           | 4<br>1629<br>1739<br>2568 | Stem specific density (SSD) or wood density                                           |
| 6*           | 7                         | Root rooting depth                                                                    |
| 9            | 10                        | Root/shoot ratio                                                                      |
| 14*          | 15                        | Leaf nitrogen (N) content per leaf dry mass                                           |
| 15*          | 16                        | Leaf phosphorus (P) content per leaf dry mass                                         |
| 21*          | 24                        | Stem diameter                                                                         |
| 24*          | 28                        | Bark thickness                                                                        |
| 26*          | 30                        | Seed dry mass                                                                         |
| 41           | 46                        | Leaf respiration rate in the dark per leaf dry mass                                   |
| 44*          | 49                        | Leaf potassium (K) content per leaf dry mass                                          |
| 45*          | 50                        | Stomatal conductance per leaf area                                                    |
| 46*          | 53                        | Leaf thickness                                                                        |
| 48*          | 55                        | Leaf density (leaf tissue density, leaf dry mass per leaf volume)                     |
| 56           | 100                       | Leaf nitrogen/phosphorus (N/P) ratio                                                  |
| 80           | 272                       | Root nitrogen (N) content per root dry mass                                           |
| 144          | 446                       | Leaf length                                                                           |
| 145          | 447                       | Leaf width                                                                            |
| 146          | 455                       | Leaf carbon/nitrogen (C/N) ratio                                                      |
| 185*         | 549<br>2382               | Leaf photosynthesis carboxylation capacity (V <sub>cmax</sub> ) per leaf dry mass     |
| 270          | 664                       | Leaf photosynthesis electron transport capacity (J <sub>max</sub> ) per leaf dry mass |
| 281*         | 713                       | Stem conduit diameter (vessels, tracheids)                                            |
| 324*         | 818                       | Crown (canopy) length: diameter along the longest axis                                |
| 413          | 996                       | Leaf chlorophyll content per leaf area                                                |
| 773*         | 1695                      | Crown (canopy) height (base to top)                                                   |
| 1055         | 1950                      | Root carbon/nitrogen (C/N) ratio                                                      |
| 1229         | 2657                      | Wood nitrogen (N) content per wood dry mass                                           |
| 3106*        | 19<br>448<br>504          | Plant height vegetative                                                               |
| 3110*        | 6577                      | Leaf area (in case of compound leaves: leaf, petiole included)                        |
| 3117*        | 6584<br>6598              | Leaf area per leaf dry mass (specific leaf area, SLA or 1/LMA)                        |
| 3120         | 2261                      | Leaf water content per leaf dry mass (not saturated)                                  |

178  
 179  
 180

181 **Supplementary Table 4.** The full set of 50 environmental covariates used as predictors in the random  
 182 forest models.  
 183

| Variable                                 | Source | Type       | Units                         | Resolution                   |
|------------------------------------------|--------|------------|-------------------------------|------------------------------|
| Annual Temp.                             | 1      | Climatic   | °C                            | 30 arcsec (≈900m at equator) |
| Temp. of the Coldest Quarter             | 1      | Climatic   | °C                            | 30 arcsec (≈900m at equator) |
| Temp. of the Driest Quarter              | 1      | Climatic   | °C                            | 30 arcsec (≈900m at equator) |
| Temp. of the Warmest Quarter             | 1      | Climatic   | °C                            | 30 arcsec (≈900m at equator) |
| Temp. of the Wettest Quarter             | 1      | Climatic   | °C                            | 30 arcsec (≈900m at equator) |
| Temp. Annual Range                       | 1      | Climatic   | °C                            | 30 arcsec (≈900m at equator) |
| Temp. Seasonality                        | 1      | Climatic   | °C                            | 30 arcsec (≈900m at equator) |
| Temp. Isothermality                      | 1      | Climatic   | Unitless                      | 30 arcsec (≈900m at equator) |
| Temp. Diurnal Range                      | 1      | Climatic   | °C                            | 30 arcsec (≈900m at equator) |
| Aridity Index                            | 2      | Climatic   | AI Value                      | ≈1km                         |
| Potential Evapotranspiration             | 2      | Climatic   | PET Value (mm)                | ≈1km                         |
| Annual Precip.                           | 1      | Climatic   | mm                            | 30 arcsec (≈900m at equator) |
| Precip. of the Coldest Quarter           | 1      | Climatic   | mm                            | 30 arcsec (≈900m at equator) |
| Precip. of the Driest Quarter            | 1      | Climatic   | mm                            | 30 arcsec (≈900m at equator) |
| Precip. of the Warmest Quarter           | 1      | Climatic   | mm                            | 30 arcsec (≈900m at equator) |
| Precip. of the Wettest Quarter           | 1      | Climatic   | mm                            | 30 arcsec (≈900m at equator) |
| Precip. Seasonality                      | 1      | Climatic   | mm                            | 30 arcsec (≈900m at equator) |
| Potential Evapotranspiration (std. dev.) | 1      | Climatic   | PET Value (mm)                | 30 arcsec (≈900m at equator) |
| Relative Humidity                        | 1      | Climatic   | % * 100                       | 30 arcsec (≈900m at equator) |
| Relative Humidity (std. Dev.)            | 1      | Climatic   | % * 100                       | 30 arcsec (≈900m at equator) |
| Growing Season Length                    | 1      | Climatic   | number of days                | 30 arcsec (≈900m at equator) |
| Growing Season Length (std. dev.)        | 1      | Climatic   | number of days                | 30 arcsec (≈900m at equator) |
| Growing Season Temp.                     | 1      | Climatic   | °C                            | 30 arcsec (≈900m at equator) |
| Growing Season Temp. (std. dev.)         | 1      | Climatic   | °C                            | 30 arcsec (≈900m at equator) |
| Number of Frost Days                     | 1      | Climatic   | Number of days                | 30 arcsec (≈900m at equator) |
| Number of Snow Days                      | 1      | Climatic   | number of days                | 30 arcsec (≈900m at equator) |
| Solar Radiation                          | 1      | Climatic   | kJ m-2                        | 30 arcsec (≈900m at equator) |
| Solar Radiation (std. dev.)              | 1      | Climatic   | kJ m-2                        | 30 arcsec (≈900m at equator) |
| Cloud Cover                              | 3      | Climatic   | % cloudy days                 | 30 arcsec (≈900m at equator) |
| Cloud Cover (std. dev.)                  | 3      | Climatic   | % cloudy days                 | 30 arcsec (≈900m at equator) |
| Burnt Areas (probability)                | 4      | Climatic   | Proportion of burned areas    | ≈500m                        |
| Snow (probability)                       | 4      | Climatic   | Proportion of snow occurrence | ≈500m                        |
| Permafrost Extent                        | 5      | Climatic   | Unitless                      | 30 arcsec (≈900m at equator) |
| Depth to Water Table                     | 6      | Geological | m below land surface          | 30 arcsec (≈900m at equator) |
| Depth to Bedrock                         | 7      | Geological | cm (up to 200)                | ≈250m                        |
| Soil Bulk Density                        | 7      | Soil       | kg / cubic-meter              | ≈250m                        |
| Soil Cation Exchange Capacity            | 7      | Soil       | cmolc/kg                      | ≈250m                        |
| Soil Clay Content                        | 7      | Soil       | mass fraction in %            | ≈250m                        |
| Soil Coarse Fragments                    | 7      | Soil       | %                             | ≈250m                        |
| Soil Water Capacity                      | 7      | Soil       | %                             | ≈250m                        |
| Soil Organic Carbon                      | 7      | Soil       | g per kg                      | ≈250m                        |
| Soil Sand Content                        | 7      | Soil       | mass fraction in %            | ≈250m                        |
| Soil Saturated Water Content             | 7      | Soil       | %                             | ≈250m                        |
| Soil Silt Content                        | 7      | Soil       | mass fraction in %            | ≈250m                        |
| Soil pH                                  | 7      | Soil       | pH x 10                       | ≈250m                        |
| Eastness                                 | 3      | Topography | eastness index (-1 to 1)      | 30 arcsec (≈900m at equator) |
| Elevation                                | 3      | Topography | meters                        | 30 arcsec (≈900m at equator) |
| Northness                                | 3      | Topography | northness index (-1 to 1)     | 30 arcsec (≈900m at equator) |
| Roughness                                | 3      | Topography | (see reference)               | 30 arcsec (≈900m at equator) |
| Slope                                    | 3      | Topography | (see reference)               | 30 arcsec (≈900m at equator) |

- 184  
 185 1. CHELSA <sup>22,23</sup>  
 186 2. CGIAR <sup>24</sup>  
 187 3. EarthEnv <sup>25</sup>  
 188 4. ESA CCI <sup>26</sup>  
 189 5. Obu *et al.* 2019  
 190 6. Fan *et al.* 2013  
 191 7. Soilgrids <sup>29</sup>  
 192

193 **Supplementary Table 5.** The PCA loading for each of the 18 traits and the 18 PC axes, along  
 194 with the % variances explained by each axis. The variable that loads most heavily on each axis is  
 195 shown in gray.

|                             | PC1         | PC2         | PC3         | PC4        | PC5        | PC6        | PC7        | PC8      | PC9        | PC10       | PC11       | PC12       | PC13       | PC14       | PC15       | PC16       | PC17       | PC18       |
|-----------------------------|-------------|-------------|-------------|------------|------------|------------|------------|----------|------------|------------|------------|------------|------------|------------|------------|------------|------------|------------|
| <b>% Variance Explained</b> | <b>24.8</b> | <b>16.3</b> | <b>11.4</b> | <b>9.3</b> | <b>5.3</b> | <b>5.2</b> | <b>4.3</b> | <b>4</b> | <b>3.5</b> | <b>2.9</b> | <b>2.6</b> | <b>2.2</b> | <b>2.1</b> | <b>1.9</b> | <b>1.4</b> | <b>1.3</b> | <b>0.8</b> | <b>0.7</b> |
| <b>Bark thickness</b>       | -0.25       | 0.06        | -0.5        | -0.45      | 0.17       | -0.05      | -0.05      | 0.03     | -0.07      | 0.54       | -0.03      | 0.11       | -0.06      | 0.1        | 0.1        | 0.04       | -0.04      | 0.02       |
| <b>Conduit diam.</b>        | 0.72        | 0.27        | -0.47       | 0.03       | -0.1       | -0.04      | -0.15      | -0.05    | 0.01       | -0.09      | -0.13      | -0.07      | -0.12      | -0.02      | -0.01      | 0.36       | 0.02       | -0.09      |
| <b>Crown diameter</b>       | 0.1         | 0.88        | 0.14        | -0.08      | -0.08      | -0.07      | 0.14       | -0.07    | -0.14      | -0.03      | -0.13      | -0.01      | 0.08       | 0.11       | -0.04      | 0.07       | 0.12       | 0.24       |
| <b>Crown height</b>         | -0.19       | 0.75        | 0.25        | -0.29      | 0.11       | -0.08      | 0.18       | -0.01    | -0.15      | -0.1       | -0.14      | 0.07       | 0.21       | 0.14       | 0.05       | -0.02      | -0.08      | -0.2       |
| <b>Leaf area</b>            | 0.69        | 0.46        | -0.31       | 0.06       | -0.2       | 0.26       | -0.2       | 0.1      | 0.05       | 0.12       | -0.19      | -0.3       | 0.08       | -0.05      | 0.02       | -0.23      | -0.02      | -0.02      |
| <b>Leaf density</b>         | -0.28       | 0.2         | -0.59       | 0.26       | 0.44       | 0.24       | -0.08      | 0.08     | -0.42      | -0.18      | 0.12       | 0.01       | -0.08      | 0          | 0.02       | -0.07      | 0.09       | -0.02      |
| <b>Leaf K</b>               | 0.56        | -0.52       | -0.03       | -0.21      | 0.18       | -0.19      | 0.04       | -0.09    | 0.01       | -0.12      | 0.02       | -0.23      | -0.1       | 0.42       | 0.01       | -0.06      | 0          | 0.01       |
| <b>Leaf N</b>               | 0.73        | 0.13        | 0.14        | -0.01      | 0.1        | -0.25      | 0.17       | -0.15    | -0.09      | -0.03      | -0.21      | 0.17       | -0.36      | -0.16      | 0.09       | -0.15      | -0.02      | 0          |
| <b>Leaf P</b>               | 0.56        | -0.3        | 0.13        | -0.25      | 0.41       | -0.23      | 0.11       | -0.13    | -0.15      | 0.09       | 0.06       | -0.23      | 0.24       | -0.27      | -0.02      | 0.05       | 0.02       | 0.01       |
| <b>Leaf thickness</b>       | -0.77       | -0.1        | -0.19       | -0.33      | -0.15      | -0.07      | 0          | -0.37    | 0.05       | 0.03       | -0.13      | -0.07      | -0.07      | -0.04      | -0.17      | -0.08      | 0.21       | -0.09      |
| <b>Leaf Vcmax</b>           | 0.75        | -0.18       | -0.38       | -0.1       | -0.04      | -0.06      | 0.04       | 0.12     | -0.04      | 0          | -0.01      | 0.27       | 0.12       | 0.04       | -0.36      | -0.07      | -0.04      | 0.01       |
| <b>Root depth</b>           | -0.19       | 0.13        | -0.34       | 0.41       | -0.34      | -0.72      | -0.04      | 0.1      | -0.15      | 0.04       | 0.15       | -0.05      | 0.07       | 0          | 0.06       | -0.06      | 0.01       | -0.02      |
| <b>Seed dry mass</b>        | 0           | 0.46        | 0.01        | 0.35       | 0.46       | -0.21      | -0.41      | -0.25    | 0.37       | 0          | 0          | 0.1        | 0.07       | 0.04       | -0.02      | -0.04      | 0          | 0.01       |
| <b>Specific leaf area</b>   | 0.74        | 0.02        | 0.39        | 0.13       | 0.03       | 0.05       | 0.02       | 0.27     | 0.08       | 0.18       | 0.1        | 0.12       | 0.03       | 0.07       | 0.08       | 0          | 0.26       | -0.1       |
| <b>Stem diameter</b>        | -0.22       | 0.02        | -0.31       | -0.67      | 0.09       | -0.19      | -0.09      | 0.42     | 0.25       | -0.29      | -0.06      | 0.03       | 0.02       | -0.1       | 0.1        | -0.04      | 0.05       | 0.04       |
| <b>Stomatal conduct.</b>    | 0.52        | 0.15        | -0.48       | -0.21      | -0.2       | 0.17       | 0.19       | -0.39    | 0.14       | -0.1       | 0.32       | 0.12       | 0.11       | -0.01      | 0.17       | -0.05      | 0.01       | 0.01       |
| <b>Tree height</b>          | 0.01        | 0.77        | 0.23        | -0.3       | 0.03       | -0.03      | 0.02       | 0.1      | 0.06       | 0.06       | 0.4        | -0.15      | -0.24      | -0.04      | -0.17      | -0.01      | -0.04      | -0.03      |
| <b>Wood density</b>         | -0.25       | 0.13        | -0.42       | 0.44       | 0.21       | 0          | 0.61       | 0.13     | 0.32       | 0.06       | -0.08      | -0.1       | -0.01      | 0          | -0.04      | 0.02       | 0          | -0.01      |

196

197

198

199

200 **Supplementary Notes**

201

202 *Extended discussion of the two-trait clusters in Fig. 4*

203

204 Intermediate to the two largest clusters in Fig. 4 (main text) is a constellation containing stem  
205 conduit diameter and stomatal conductance, demonstrating leaf/wood water regulation (Fig. 4,  
206 yellow). This constellation loads most strongly on PC 1, as moisture regulation, nutrient-use, and  
207 photosynthesis are closely interrelated. Nevertheless, conduit diameter, in particular, correlates  
208 moderately with traits indicative of light interception, notably leaf area ( $\rho = 0.48$ ) and tree height  
209 ( $\rho = 0.25$ ). Although the largest differences in stem conduit size are observed between angiosperms  
210 and gymnosperms, wider conduits confer greater conducting efficiency regardless of architecture<sup>1</sup>.  
211 Indeed, these patterns hold within clades as well, particularly when comparing conduit diameter  
212 to leaf area ( $\rho = 0.43$  vs  $0.38$  for angiosperms vs. gymnosperms). The associations between water  
213 regulation and light interception highlights that leaf area and tree height induce important  
214 physiological and mechanical demands on organism-level water availability, which prevent  
215 against cavitation and desiccation.

216 Tree diameter and bark thickness also emerge as a distinct two-trait cluster. Recent research has  
217 shown that bark thickness is mainly driven by plant size (mainly stem diameter). This strong  
218 association likely reflects, not only bark accumulation as trees age, but also functional/metabolic  
219 needs as plants grow taller and increase in total leaf area<sup>2,3</sup>. From an ecological perspective, thick  
220 bark can be critical for defense against fire and pest damage (mainly a thick outer bark region),  
221 and for storage and photosynthate transport (mainly a thick inner bark region)<sup>4,5</sup>. Moreover,  
222 because older individuals are more likely to have been exposed to multiple disturbances across  
223 their lifetime, large-diameter trees in older forests can exhibit survivorship bias towards thick-bark  
224 individuals which were able to withstand historical stressors<sup>3,6</sup>. However, such relationships are  
225 strongly ecosystem-dependent, leading to weak overall relationships between climate, fire  
226 regimes, and bark thickness at the global scale, with stem diameter emerging as the strongest single  
227 predictor<sup>2</sup>.

228 The final two-trait cluster is comprised of wood density and leaf density. Both traits are key  
229 indicators of “slow” life-history strategies in trees, correlating negatively with growth rate and



230 water transport, but positively with abiotic stress tolerance and resilience to disturbance<sup>7</sup>. Thick  
231 leaves and thick wood each protect against herbivory and pests while protecting against desiccation  
232 risk and mechanical damage<sup>8-11</sup>. Wood density has been identified as a particularly important  
233 multi-functional indicator of tree form and function, reflecting various aspects of tree hydraulics,  
234 pest resistance, decay rate, structural stability, tree size, growth rate, and tree mortality<sup>9,12-15</sup>. The  
235 production of dense wood and leaves is, however, more energetically costly, limiting growth rate  
236 but increasing life span<sup>12,16</sup>. The fact that wood and leaf density emerge as an independent trait  
237 constellation reinforces previous inference that these traits are aligned at one end of the slow-fast  
238 spectrum, and uniquely integrate multiple physiological and ecological pressures<sup>7,12,16</sup>.

239

#### 240 *Exploration of invasive species in the dataset*

241 We explored the level of invasiveness in our dataset by combining the GloNAF<sup>17</sup> and Kew<sup>18</sup>  
242 invasive species databases to identify whether each observation was occurring within that  
243 species' native or invasive range. The average proportion of invasive species observations was  
244 less than half a percent across all traits (0.3%), with leaf area having the highest proportion  
245 (0.814%), equating to 11 species out of 1352 species with a measurement taken at a location  
246 outside their native range. There was only one species with more than 5 measurements for a  
247 given trait taken out outside of its native range: *Castanea sativa* had 28, 20 and 22 measurements  
248 taken for wood density, leaf N and leaf P, making up significantly less than 0.5% of observations  
249 for each trait. Moreover, these locations where *C. sativa* is invasive are located in France, Spain,  
250 Germany, and the UK. And while these lie outside of its estimated original range, it has since  
251 been established in these regions for more than 1000 years<sup>19</sup>. Such results demonstrate the  
252 challenges exploring trait variation between invasive and native populations, in part due to  
253 widely different definitions of “invasive” across databases.

254

255

256 **Supplementary References**

257

- 258 1. Sperry, J. S., Hacke, U. G. & Pittermann, J. Size and function in conifer tracheids and  
259 angiosperm vessels. *Am. J. Bot.* **93**, 1490–1500 (2006).
- 260 2. Rosell, J. A. Bark thickness across the angiosperms: More than just fire. *New Phytol.* **211**,  
261 90–102 (2016).
- 262 3. Williams, V. L., Witkowski, E. T. F. & Balkwill, K. Relationship between bark thickness  
263 and diameter at breast height for six tree species used medicinally in South Africa. *South  
264 African J. Bot.* **73**, 449–465 (2007).
- 265 4. Schafer, J. L., Breslow, B. P., Hohmann, M. G. & Hoffmann, W. A. Relative bark  
266 thickness is correlated with tree species distributions along a fire frequency gradient. *Fire  
267 Ecol.* **11**, 74–87 (2015).
- 268 5. Rosell, J. A. *et al.* Inner bark as a crucial tissue for non-structural carbohydrate storage  
269 across three tropical woody plant communities. *Plant Cell Environ.* **44**, 156–170 (2021).
- 270 6. Poorter, L., Mcneil, A., Hurtado, V. H., Prins, H. H. T. & Putz, F. E. Bark traits and life-  
271 history strategies of tropical dry- and moist forest trees. *Funct. Ecol.* **28**, 232–242 (2014).
- 272 7. Niinemets, Ü. Global-scale climatic controls of leaf dry mass per area, density, and  
273 thickness in trees and shrubs. *Ecology* **82**, 453–469 (2001).
- 274 8. Onoda, Y. *et al.* Global patterns of leaf mechanical properties. *Ecol. Lett.* **14**, 301–312  
275 (2011).
- 276 9. Iida, Y. *et al.* Wood density explains architectural differentiation across 145 co-occurring  
277 tropical tree species. *Funct. Ecol.* **26**, 274–282 (2012).
- 278 10. Agrawal, A. a & Fishbein, M. Plant defense syndromes. *Ecology* **87**, S132-49 (2006).
- 279 11. Ruiz-Guerra, B., García, A., Velázquez-Rosas, N., Angulo, D. & Guevara, R. Plant-  
280 functional traits drive insect herbivory in a tropical rainforest tree community. *Perspect.*

- 281 *Plant Ecol. Evol. Syst.* **48**, (2021).
- 282 12. Chave, J. *et al.* Towards a worldwide wood economics spectrum. *Ecol. Lett.* **12**, 351–366  
283 (2009).
- 284 13. Davi, H. *et al.* Distribution of endemic bark beetle attacks and their physiological  
285 consequences on *Pinus halepensis*. *For. Ecol. Manage.* **469**, (2020).
- 286 14. Wright, S. J. *et al.* Functional traits and the growth-mortality trade-off in tropical trees.  
287 *Ecology* **91**, 3664–3674 (2010).
- 288 15. King, D. A., Davies, S. J., Tan, S. & Noor, N. S. M. The role of wood density and stem  
289 support costs in the growth and mortality of tropical trees. *J. Ecol.* **94**, 670–680 (2006).
- 290 16. Reich, P. B. The world-wide ‘fast-slow’ plant economics spectrum: A traits manifesto. *J.*  
291 *Ecol.* **102**, 275–301 (2014).
- 292 17. van Kleunen, M. *et al.* The Global Naturalized Alien Flora (GloNAF) database. *Ecology*  
293 **100**, 1–2 (2019).
- 294 18. POWO. Plants of the World Online. Facilitated by the Royal Botanic Gardens, Kew  
295 (Published on the Internet). 2022 <http://www.plantsoftheworldonline.org/>.
- 296 19. Conedera, M., Krebs, P., Tinner, W., Pradella, M. & Torriani, D. The cultivation of  
297 *Castanea sativa* (Mill.) in Europe, from its origin to its diffusion on a continental scale.  
298 *Veg. Hist. Archaeobot.* **13**, 161–179 (2004).
- 299 20. Mill, R. R. *et al.* A new classification and linear sequence of extant gymnosperms.  
300 *Phytotaxa* **70**, 55–70 (2011).
- 301 21. BGCI. *GlobalTreeSearch online database (version 1.4)*. *Botanic Gardens Conservation*  
302 *International*. (Available at [https://tools.bgci.org/global\\_tree\\_search.php](https://tools.bgci.org/global_tree_search.php), 2020).
- 303 22. Karger, D. N., Conrad, O., Böhrner, J., Kawohl, T. & Kreft, H. Data from: Climatologies at  
304 high resolution for the earth’s land surface areas. *Dryad Digit. Repos.* (2018).
- 305 23. Karger, D. N. *et al.* Climatologies at high resolution for the earth’s land surface areas. *Sci.*

- 306 *Data* **4**, 1–20 (2017).
- 307 24. Trabucco, A. & Zomer, R. Global Aridity Index and Potential Evapotranspiration (ET0)  
308 Climate Database v2. *Figshare*. <https://doi.org/10.6084/m9.figshare.7504448.v3> (2019).
- 309 25. Tuanmu, M. N. & Jetz, W. A global, remote sensing-based characterization of terrestrial  
310 habitat heterogeneity for biodiversity and ecosystem modelling. *Glob. Ecol. Biogeogr.* **24**,  
311 1329–1339 (2015).
- 312 26. ESA Land Cover CCI project team & Defourny, P. ESA Land Cover Climate Change  
313 Initiative (Land\_Cover\_cci): Land Surface Seasonality Products. *Cent. Environ. Data*  
314 *Anal.* <https://catalogue.ceda.ac.uk/uuid/7c114fc6e2884c1f> (2017).
- 315 27. Obu, J. *et al.* Northern Hemisphere permafrost map based on TTOP modelling for 2000–  
316 2016 at 1 km<sup>2</sup> scale. *Earth-Science Rev.* **193**, 299–316 (2019).
- 317 28. Fan, Y., Li, H. & Miguez-Macho, G. Global patterns of groundwater table depth. *Science*  
318 (80-. ). **339**, 940–943 (2013).
- 319 29. Hengl, T. *et al.* SoilGrids250m: Global gridded soil information based on machine  
320 learning. *PLoS One* **12**, 1–40 (2017).
- 321 30. Díaz, S. *et al.* The global spectrum of plant form and function. *Nature* **529**, 1–17 (2015).
- 322 31. Joswig, J. S. *et al.* Climatic and soil factors explain the two-dimensional spectrum of  
323 global plant trait variation. *Nat. Ecol. Evol.* **6**, 24–27 (2022).

324
