# Supplementary material for: Global relationships in tree functional traits
Source: Springer Nature journal article supplement (doi:10.1038/s41467-022-30888-2), 2022-06-08
Supplement: MOESM2 [file 41467_2022_30888_MOESM2_ESM.pdf]

## 1 **Supplementary Data References**

2

- 3 1. Adriaenssens S. (2012). Dry deposition and canopy exchange for temperate tree species  
4 under high nitrogen deposition. PhD thesis, Ghent University, Ghent, Belgium, 209p.
- 5 2. Atkin OK (2015) Global variability in leaf respiration among plant functional types in  
6 relation to climate and leaf traits. *New Phytologist* DOI: 10.1111/nph.13253
- 7 3. Aubin, I., Messier, C., Gachet, S., Lawrence, K., McKenney, D., Arseneault, A., Bell, W.,  
8 De Grandpré, L., Shipley, B., Ricard, J.P. and Munson, A.D., 2012. TOPIC-traits of plants  
9 in Canada. Natural Resources Canada, Canadian Forest Service, Sault Ste. Marie, Ontario.  
10 Online [URL] TOPIC website :<http://cfs.cloud.nrcan.gc.ca/ctn/topic.php>
- 11 4. Auger, S., Shipley, B. (2012). Interspecific and intraspecific trait variation along short  
12 environmental gradients in an old-growth temperate forest. *Journal of Vegetation Science*.  
13 DOI: 1111/j.1654-1103.2012.01473.x
- 14 5. Bahar, NHA, Ishida, FY, Weerasinghe, LK, Guerrieri, R, OSullivan, OS, Bloomfield, KJ,  
15 Asner, GP, Martin, RE, Lloyd, J, Malhi, Y, Phillips, OL, Meir, P, Salinas, N, Cosio, EG,  
16 Domingues, TF, Quesada, CA, Sinca, F, Escudero Vega, A, Zuloaga Ccorimanya, PP, del  
17 Aguila-Pasquel, J, Quispe Huaypar, K, Cuba Torres, I, Butrón Loayza, R, Pelaez Tapia, Y,  
18 Huaman Ovalle, J, Long, BM, Evans, JR, Atkin, OK (2017) Leaf-level photosynthetic  
19 capacity in lowland Amazonian and high-elevation Andean tropical moist forests of Peru.  
20 *New Phytologist* 214, 1002-1018.
- 21 6. Baraloto, C., C. E. T. Paine, L. Poorter, J. Beauchene, D. Bonal, A.-M. Domenach, B.  
22 Herault, S. Patino, J.-C. Roggy, and J. Chave. 2010. Decoupled leaf and stem economics  
23 in rainforest trees. *Ecology Letters* 13:1338-1347
- 24 7. Baruch, Z. & Goldstein, G. 1999. Leaf construction cost, nutrient concentration, and net  
25 CO<sub>2</sub> assimilation of native and invasive species in Hawaii. *Oecologia* 121: 183-192

- 26 8. Blonder, B., Baldwin, B., Enquist, B.J., Robichaux, R.H. (2016) Variation and  
27 macroevolution in leaf functional traits in the Hawaiian silversword alliance (Asteraceae).  
28 *Journal of Ecology* 104:219-228 DOI: 10.1111/1365-2745.12497
- 29 9. Blonder, B., Buzzard, B., Sloat, L., Simova, I., Lipson, R., Boyle, B., Enquist, B. (2012)  
30 The shrinkage effect biases estimates of paleoclimate. *American Journal of Botany*. 99.11  
31 1756-1763
- 32 10. Bond-Lamberty, B., C. Wang, and S. T. Gower (2002), Above- and belowground biomass  
33 and sapwood area allometric equations for six boreal tree species of northern Manitoba,  
34 *Can. J. For. Res.*, 32(8), 1441-1450.
- 35 11. Bond-Lamberty, B., C. Wang, and S. T. Gower (2002), Leaf area dynamics of a boreal  
36 black spruce fire chronosequence, *Tree Physiol.*, 22(14), 993-1001.
- 37 12. Bond-Lamberty, B., C. Wang, and S.T. Gower (2004), Net primary production and net  
38 ecosystem production of a boreal black spruce fire chronosequence, *Global Change Biol.*,  
39 10(4), 473-487.
- 40 13. Brendan Choat, Steven Jansen, Tim J. Brodribb, Herve Cochard, Sylvain Delzon, Radika  
41 Bhaskar, Sandra J. Bucci, Taylor S. Feild, Sean M. Gleason, Uwe G. Hacke, Anna L.  
42 Jacobsen, Frederic Lens, Hafiz Maherali, Jordi Martinez-Vilalta, Stefan Mayr, Maurizio  
43 Mencuccini, Patrick J. Mitchell, Andrea Nardini, Jarmila Pittermann, R. Brandon Pratt,  
44 John S. Sperry, Mark Westoby, Ian J. Wright & Amy E. Zanne (2012) Global convergence  
45 in the vulnerability of forests to drought. *Nature* 491:752-755 doi:10.1038/nature11688
- 46 14. Brown, K.A., S.E. Johnson, K. Parks, S.M. Holmes, T. Ivoandry, N.K. Abram, K.E.  
47 Delmore, R. Ludovic, H.E. Andriamaharoa, T.M. Wyman, P.C. Wright (2013) Use of  
48 provisioning ecosystem services drives loss of functional traits across land use  
49 intensification gradients in tropical forests in Madagascar. *Biological Conservation* 161:  
50 118-127
- 51 15. Buchanan, S., Isaac, M.E., Van den Meersche, K. et al. *Agroforest Syst* (2018).  
52 <https://doi.org/10.1007/s10457-018-0239-1>

- 53 16. Burrascano S, Copiz R, Del Vico E, Fagiani S, Giarrizzo E, Mei M, Mortelliti A, Sabatini  
54 FM, Blasi C (2015) Wild boar rooting intensity determines shifts in understorey  
55 composition and functional traits. *Community ecology* 16(2) 244-253 DOI:  
56 10.1556/168.2015.16.2.12
- 57 17. Butterfield, B.J. and J.M. Briggs. 2011. Regeneration niche differentiates functional  
58 strategies of desert woody plant species. *Oecologia*, 165:477-487.
- 59 18. Campetella, G; Botta-Dukát, Z; Wellstein, C; Canullo, R; Gatto, S; Chelli, S; Mucina, L;  
60 Bartha, S (2011): Patterns of plant trait-environment relationships along a forest succession  
61 chronosequence. *Agriculture, Ecosystems & Environment*, 145(1), 38-48.  
62 doi:10.1016/j.agee.2011.06.025
- 63 19. Carswell, F. E., Meir, P., Wandelli, E. V., Bonates, L. C. M., Kruijt, B., Barbosa, E. M.,  
64 Nobre, A. D. & Jarvis, P. G. 2000 Photosynthetic capacity in a central Amazonian rain  
65 forest. *Tree physiology*. 20, 3, p. 179-186 8 p.
- 66 20. Catford, J. A., Morris, W. K., Vesk, P. A., Gippel, C. J. & Downes, B. J. (2014) Species  
67 and environmental characteristics point to flow regulation and drought as drivers of  
68 riparian plant invasion. *Diversity and Distributions*, 20, 1084-1096.  
69 <http://dx.doi.org/10.1111/ddi.12225>
- 70 21. Cavender-Bares, J., A. Keen, and B. Miles. 2006. Phylogenetic structure of floridian plant  
71 communities depends on taxonomic and spatial scale. *Ecology* 87:S109-S122.
- 72 22. Chacón-Madrigal, E., Wanek, W., Hietz, P., & S. Dullinger. 2018. Traits indicating a  
73 conservative resource strategy are weakly related to narrow range size in a group of  
74 neotropical trees. *Perspectives in Plant Ecology, Evolution, and Systematics*,  
75 <https://doi.org/10.1016/j.ppees.2018.01.003>
- 76 23. Cornelissen, J. H. C. 1996. An experimental comparison of leaf decomposition rates in a  
77 wide range of temperate plant species and types. *Journal of Ecology* 84:573-582.
- 78 24. Cornelissen, J. H. C., B. Cerabolini, P. Castro-Diez, P. Villar-Salvador, G. Montserrat-  
79 Marti, J. P. Puyravaud, M. Maestro, M. J. A. Werger, and R. Aerts. 2003. Functional traits

- 80 of woody plants: correspondence of species rankings between field adults and laboratory-  
81 grown seedlings? *Journal of Vegetation Science* 14:311-322.
- 82 25. Cornelissen, J. H. C., H. M. Quested, D. Gwynn-Jones, R. S. P. Van Logtestijn, M. A. H.  
83 De Beus, A. Kondratchuk, T. V. Callaghan, and R. Aerts. 2004. Leaf digestibility and litter  
84 decomposability are related in a wide range of subarctic plant species and types. *Functional*  
85 *Ecology* 18:779-786.
- 86 26. Cornwell, W. K., R. Bhaskar, L. Sack, S. Cordell, and C. K. Lunch. 2007. Adjustment of  
87 structure and function of Hawaiian *Metrosideros polymorpha* at high vs. low precipitation.  
88 *Functional Ecology* 21:1063-1071.
- 89 27. Craine, J. M., A. J. Elmore, M. P. M. Aida, M. Bustamante, T. E. Dawson, E. A. Hobbie,  
90 A. Kahmen, M. C. Mack, K. K. McLaughlan, A. Michelsen, G. B. Nardoto, L. H. Pardo, J.  
91 Penuelas, P. B. Reich, E. A. G. Schuur, W. D. Stock, P. H. Templer, R. A. Virginia, J. M.  
92 Welker, and I. J. Wright. 2009. Global patterns of foliar nitrogen isotopes and their  
93 relationships with climate, mycorrhizal fungi, foliar nutrient concentrations, and nitrogen  
94 availability. *New Phytologist* 183:980-992.
- 95 28. Craven, D., D. Braden, M. S. Ashton, G. P. Berlyn, M. Wishnie, and D. Dent. 2007.  
96 Between and within-site comparisons of structural and physiological characteristics and  
97 foliar nutrient content of 14 tree species at a wet, fertile site and a dry, infertile site in  
98 Panama. *Forest Ecology and Management* 238:335-346.
- 99 29. Díaz, S., J. G. Hodgson, K. Thompson, M. Cabido, J. H. C. Cornelissen, A. Jalili, G.  
100 Montserrat-Martí, J. P. Grime, F. Zarrinkamar, Y. Asri, S. R. Band, S. Basconcelo, P.  
101 Castro-Díez, G. Funes, B. Hamzehee, M. Khoshnevi, N. Pérez-Harguindeguy, M. C. Pérez-  
102 Rontomé, F. A. Shirvany, F. Vendramini, S. Yazdani, R. Abbas-Azimi, A. Bogaard, S.  
103 Boustani, M. Charles, M. Dehghan, L. de Torres-Espuny, V. Falczuk, J. Guerrero-Campo,  
104 A. Hynd, G. Jones, E. Kowsary, F. Kazemi-Saeed, M. Maestro-Martínez, A. Romo-Díez,  
105 S. Shaw, B. Siavash, P. Villar-Salvador, and M. R. Zak. 2004. The plant traits that drive  
106 ecosystems: Evidence from three continents. *Journal of Vegetation Science* 15:295-304.

- 107 30. Dahlin KM, Asner GP & CB Field (2013) Environmental and community controls on plant  
108 canopy chemistry in a Mediterranean-type ecosystem. Proceedings of the National  
109 Academy of Sciences USA. 110(17): 6895-6900
- 110 31. Dawson, S. K., Warton, D. I., Kingsford, R. T., Berney, P. , Keith, D. A., Catford, J. A.  
111 and Mori, A. (2017), Plant traits of propagule banks and standing vegetation reveal  
112 flooding alleviates impacts of agriculture on wetland restoration. J Appl Ecol, 54: 1907-  
113 1918. doi:10.1111/1365-2664.12922
- 114 32. de Araujo, A.C., J. P. H. B. Ometto, A. J. Dolman, B. Kruijt, M. J. Waterloo and J. R.  
115 Ehleringer. 2011. LBA-ECO CD-02 C and N Isotopes in Leaves and Atmospheric CO<sub>2</sub>,  
116 Amazonas, Brazil. Data set. Available on-line [<http://daac.ornl.gov> ] from Oak Ridge  
117 National Laboratory Distributed Active Archive Center, Oak Ridge, Tennessee, U.S.A.
- 118 33. de Araujo, A.C., J.P.H.B. Ometto, A.J. Dolman, B. Kruijt, M.J. Waterloo and J.R.  
119 Ehleringer. 2012. LBA-ECO CD-02 C and N Isotopes in Leaves and Atmospheric CO<sub>2</sub>,  
120 Amazonas, Brazil. Data set. Available on-line [<http://daac.ornl.gov> ] from Oak Ridge  
121 National Laboratory Distributed Active Archive Center, Oak Ridge, Tennessee, U.S.A.  
122 <http://dx.doi.org/10.3334/ORNLDAAC/1097>
- 123 34. Domingues TF, Meir P, Feldpausch TR, et al. (2010) Co-limitation of photosynthetic  
124 capacity by nitrogen and phosphorus in West Africa woodlands. Plant, Cell & Environment  
125 (33): 959-980.
- 126 35. Falster DS, Remko A. Duursma, Masae I. Ishihara, Diego R. Barneche, Richard G.  
127 FitzJohn, Angelica Våhammar, Masahiro Aiba, Makoto Ando, Niels Anten, Michael J.  
128 Aspinwall, Jennifer L. Baltzer, Christopher Baraloto, Michael Battaglia, John J. Battles,  
129 Ben Bond-Lamberty, Michiel van Breugel, James Camac, Yves Claveau, Lluís Coll,  
130 Masako Dannoura, Sylvain Delagrangue, Jean-Christophe Domec, Farrah Fatemi, Wang  
131 Feng, Veronica Gargaglione, Yoshiaki Goto, Akio Hagihara, Jefferson S. Hall, Steve  
132 Hamilton, Degi Harja, Tsutomu Hiura, Robert Holdaway, Lindsay B. Hutley, Tomoaki  
133 Ichie, Eric J. Jokela, Anu Kantola, Jeff W. G. Kelly, Tanaka Kenzo, David King, Brian D.  
134 Kloeppel, Takashi Kohyama, Akira Komiyama, Jean-Paul Laclau, Christopher H. Lusk,  
135 Douglas A. Maguire, Gueric le Maire, Annikki Mäkelä, Lars Markesteijn, John Marshall,

- 136 Katherine McCulloh, Itsuo Miyata, Karel Mokany, Shigeta Mori, Randall W. Myster,  
137 Masahiro Nagano, Shawna L. Naidu, Yann Nouvellon, Anthony P. OGrady, Kevin L.  
138 OHara, Toshiyuki Ohtsuka, Noriyuki Osada, Olusegun O. Osunkoya, Pablo Luis Peri, Any  
139 Mary Petritan, Lourens Poorter, Angelika Portsmuth, Catherine Potvin, Johannes Ransijn,  
140 Douglas Reid, Sabina C. Ribeiro, Scott D. Roberts, Rolando Rodríguez, Angela Saldaña-  
141 Acosta, Ignacio Santa-Regina, Kaichiro Sasa, N. Galia Selaya, Stephen C. Sillett, Frank  
142 Sterck, Kentaro Takagi, Takeshi Tange, Hiroyuki Tanouchi, David Tissue, Toru Umehara,  
143 Hajime Utsugi, Matthew A. Vadeboncoeur, Fernando Valladares, Petteri Vanninen, Jian  
144 R. Wang, Elizabeth Wenk, Richard Williams, Fabiano de Aquino Ximenes, Atsushi  
145 Yamaba, Toshihiro Yamada, Takuo Yamakura, Ruth D. Yanai, and Robert A. York. 2015.  
146 BAAD: a biomass and allometry database for woody plants. *Ecology*  
147 96:1445.<http://dx.doi.org/10.1890/14-1889.1>
- 148 36. Fan Y, Gonzalo Miguez-Macho, Esteban G. Jobbágy, Robert B. Jackson, Carlos Otero-  
149 Casal (2017) Hydrologic regulation of plant rooting depth. *Proceedings of the National*  
150 *Academy of Sciences* 114 (40) 10572-10577; DOI: 10.1073/pnas.1712381114
- 151 37. Fonseca, C. R., J. M. Overton, B. Collins, and M. Westoby. 2000. Shifts in trait-  
152 combinations along rainfall and phosphorus gradients. *Journal of Ecology* 88:964-977.
- 153 38. Forgiarini, C., Souza, A.F., Longhi, S.J., Oliveira, J.M., 2015. In the lack of extreme  
154 pioneers: trait relationships and ecological strategies of 66 subtropical tree species. *J. Plant*  
155 *Ecol.* 8, 359-367. doi:10.1093/jpe/rtu028
- 156 39. Freschet, G. T., J. H. C. Cornelissen, R. S. P. van Logtestijn, and R. Aerts. 2010. Evidence  
157 of the ‘plant economics spectrum’ in a subarctic flora. *Journal of Ecology* 98:362-373.
- 158 40. Fyllas, N. M., S. Patino, T. R. Baker, G. Bielefeld Nardoto, L. A. Martinelli, C. A. Quesada,  
159 R. Paiva, M. Schwarz, V. Horna, L. M. Mercado, A. Santos, L. Arroyo, E. M. Jimenez, F.  
160 J. Luizao, D. A. Neill, N. Silva, A. Prieto, A. Rudas, M. Silviera, I. C. G. Vieira, G. Lopez-  
161 Gonzale, and J. Lloyd. 2009. Basin-wide variations in foliar properties of Amazonian  
162 forest: phylogeny, soils and climate *Biogeosciences* 6:2677-2708.
- 163 41. Garnier, E., S. Lavorel, P. Ansquer, H. Castro, P. Cruz, J. Dolezal, O. Eriksson, C. Fortunel,  
164 H. Freitas, C. Golodets, K. Grigulis, C. Jouany, E. Kazakou, J. Kigel, M. Kleyer, V.

- 165 Lehsten, J. Leps, T. Meier, R. Pakeman, M. Papadimitriou, V. P. Papanastasis, H. Quested,  
166 F. Quetier, M. Robson, C. Roumet, G. Rusch, C. Skarpe, M. Sternberg, J.-P. Theau, A.  
167 Thebault, D. Vile, and M. P. Zarovali. 2007. Assessing the effects of land-use change on  
168 plant traits, communities and ecosystem functioning in grasslands: A standardized  
169 methodology and lessons from an application to 11 European sites. *Annals of Botany*  
170 99:967-985.
- 171 42. Givnish T.J., R.A. Montgomery and G. Goldstein. 2004. Adaptive radiation of  
172 photosynthetic physiology in the Hawaiian lobeliads: light regimes, static light responses,  
173 and whole-plant compensation points. *American Journal of Botany* 91: 228-246
- 174 43. Gonzalez-Akre, E., McShea, W., Bourg, N., Anderson-Teixeira, K. 2015. Leaf traits data  
175 (SLA) for 56 woody species at the Smithsonian Conservation Biology Institute-ForestGEO  
176 Forest Dynamic Plot. Front Royal, Virginia. USA. [Data set]. Version 1.0.(www.try-  
177 db.org)
- 178 44. Guerin G.R., Wen H. & Lowe A.J. (2012) Leaf morphology shift linked to climate change.  
179 *Biology Letters* 8, 882-886.
- 180 45. Gutiérrez AG, & Huth A (2012) Successional stages of primary temperate rainforests of  
181 Chiloé Island, Chile. *Perspectives in plant ecology, systematics and evolution*. 14: 243-  
182 256
- 183 46. Han, W. X., J. Y. Fang, D. L. Guo, and Y. Zhang. 2005. Leaf nitrogen and phosphorus  
184 stoichiometry across 753 terrestrial plant species in China. *New Phytologist* 168:377-385.
- 185 47. Hao, G. Y., L. Sack, A. Y. Wang, K. F. Cao, and G. Goldstein. 2010. Differentiation of  
186 leaf water flux and drought tolerance traits in hemiepiphytic and non-hemiepiphytic *Ficus*  
187 tree species. *Functional Ecology* 24:731-740.
- 188 48. Hietz, P., Rosner, S., Hietz-Seifert, U. & Wright, S.J. (2017). Wood traits related to size  
189 and life history of trees in a Panamanian rainforest. *New Phytol.*, 213, 170-180
- 190 49. HIGUCHI, P.; SILVA, A.C. Araucaria Forest Database. 2013

- 191 50. Hoof, J., L. Sack, D. T. Webb, and E. T. Nilsson. 2008. Contrasting structure and function  
192 of pubescent and glabrous varieties of Hawaiian *Metrosideros polymorpha* (Myrtaceae) at  
193 high elevation. *Biotropica* 40:113-118.
- 194 51. Iversen CM, McCormack ML, Powell AS, Blackwood CB, Freschet GT, Kattge J, Roumet  
195 C, Stover DB, Soudzilovskaia NA, Valverde-Barrantes OJ, van Bodegom PM, Violle C  
196 (2017) A global Fine-Root Ecology Database to address belowground challenges in plant  
197 ecology. *New Phytologist*. doi:10.1111/nph.14486.
- 198 52. Jennifer S. Powers and Peter Tiffin 2012 Plant functional type classifications in tropical  
199 dry forests in Costa Rica: leaf habit versus taxonomic approaches. *Functional Ecology*  
200 2010, 24, 927-936 doi: 10.1111/j.1365-2435.2010.01701.x
- 201 53. Joseph, G.S., Seymour, C.L., Cumming, G.S., Cumming, D.H.M., & Mahlangu, Z. 2014.  
202 Termite mounds increase functional diversity of woody plants in African savannas.  
203 *Ecosystems* 17: 808-819.
- 204 54. Kattge, J., W. Knorr, T. Raddatz, and C. Wirth. 2009. Quantifying photosynthetic capacity  
205 and its relationship to leaf nitrogen content for global-scale terrestrial biosphere models.  
206 *Global Change Biology* 15:976-991.
- 207 55. Kichenin et al. 2013. Contrasting effects of plant inter- and intraspecific variation on  
208 community-level trait measures along an environmental gradient. *Functional Ecology*, in  
209 press.
- 210 56. Kleyer, M., R. M. Bekker, I. C. Knevel, J. P. Bakker, K. Thompson, M. Sonnenschein, P.  
211 Poschlod, J. M. van Groenendael, L. Klimes, J. Klimesova, S. Klotz, G. M. Rusch, Hermy,  
212 M. , D. Adriaens, G. Boedeltje, B. Bossuyt, A. Dannemann, P. Endels, L. Götzenberger, J.  
213 G. Hodgson, A.-K. Jackel, I. Kühn, D. Kunzmann, W. A. Ozinga, C. Römermann, M.  
214 Stadler, J. Schlegelmilch, H. J. Steendam, O. Tackenberg, B. Wilmann, J. H. C.  
215 Cornelissen, O. Eriksson, E. Garnier, and B. Peco. 2008. The LEDA Traitbase: a database  
216 of life-history traits of the Northwest European flora. *Journal of Ecology* 96:1266-1274.
- 217 57. Knauer et al. (2017) Towards physiologically meaningful water-use efficiency estimates  
218 from eddy covariance data. *Global Change Biology*, DOI: 10.1111/gcb.13893



- 219 58. Kraft, N. J. B., R. Valencia, and D. Ackerly. 2008. Functional traits and niche-based tree  
220 community assembly in an Amazonian forest. *Science* 322:580-582.
- 221 59. Kurokawa, H. and T. Nakashizuka. 2008. Leaf herbivory and decomposability in a  
222 Malaysian tropical rain forest. *Ecology* 89:2645-2656.
- 223 60. Laughlin, D. C., J. J. Leppert, M. M. Moore, and C. H. Sieg. 2010. A multi-trait test of the  
224 leaf-height-seed plant strategy scheme with 133 species from a pine forest flora. *Functional*  
225 *Ecology* 24:493-501.
- 226 61. Laughlin, D.C., P.Z. Fulé, D.W. Huffman, J. Crouse, and E. Laliberte. 2011. Climatic  
227 constraints on trait-based forest assembly. *Journal of Ecology* 99:1489-1499.
- 228 62. Lhotsky B., Anikó Csecserits, Bence Kovács, Zoltán Botta-Dukát: New plant trait records  
229 of the Hungarian flora
- 230 63. Li, R., Zhu, S., Chen, H. Y. H., John, R., Zhou, G., Zhang, D., Zhang, Q. and Ye, Q. (2015),  
231 Are functional traits a good predictor of global change impacts on tree species abundance  
232 dynamics in a subtropical forest?. *Ecol Lett*, 18: 1181-1189. doi:10.1111/ele.12497
- 233 64. Lin Y-S, Medlyn BE, Duursma RA, Prentice IC, Wang H, Baig S, Eamus D, De Dios VR,  
234 Mitchell P, Ellsworth DS, De Beeck MO, Wallin G, Uddling J, Tarvainen L, Linderson M-  
235 L, Cernusak LA, Nippert JB, Ocheltree TW, Tissue DT, Martin-StPaul NK, Rogers A,  
236 Warren JM, De Angelis P, Hikosaka K, Han Q, Onoda Y, Gimeno TE, Barton CVM,  
237 Bennie J, Bonal D, Bosc A, Löw M, Macinins-Ng C, Rey A, Rowland L, Setterfield SA,  
238 Tausz-Posch S, Zaragoza-Castells J, Broadmeadow MSJ, Drake JE, Freeman M,  
239 Ghannoum O, Hutley LB, Kelly JW, Kikuzawa K, Kolari P, Koyama K, Limousin J-M,  
240 Meir P, Da Costa ACL, Mikkelsen TN, Salinas N, Sun W, Wingate L, (2015) Optimal  
241 stomatal behaviour around the world. *Nature Climate Change* 5(5): 459-464 DOI:  
242 10.1038/NCLIMATE2550
- 243 65. Lukeš, P., Stenberg, P., Rautiainen, M., Möttus, M., Vanhatalo, K.M. Optical properties of  
244 leaves and needles for boreal tree species in Europe (2013) *Remote Sensing Letters*, 4 (7),  
245 pp. 667-676

- 246 66. Lusk, C. H., Kaneko, T., Grierson, E. and Clearwater, M. (2013) Correlates of tree species  
247 sorting along a temperature gradient in New Zealand rain forests: seedling functional traits,  
248 growth and shade tolerance. *Journal of Ecology*, 101: 1531-1541.
- 249 67. Maire V, Ian J. Wright, I. Colin Prentice, Niels H. Batjes, Radika Bhaskar, Peter M. van  
250 Bodegom, Will K. Cornwell, David Ellsworth, Ülo Niinemets, Alejandro Ordoñez, Peter  
251 B. Reich, Louis S. Santiago (2015). Global soil and climate effects on leaf photosynthetic  
252 traits and rates. *Global Ecology and Biogeography* 24(6): 706-717. Maire V, Wright IJ,  
253 Prentice IC, Batjes NH, Bhaskar R, van Bodegom PM, Cornwell WK, Ellsworth D,  
254 Niinemets Ü, Ordoñez A, Reich PB, Santiago LS (2015) Data from: Global effects of soil  
255 and climate on leaf photosynthetic traits and rates. Dryad Digital Repository.  
256 <http://dx.doi.org/10.5061/dryad.j42m7>
- 257 68. Martinez-Garza, C., F. Bongers, and L. Poorter. 2013a. Are functional traits good  
258 predictors of species performance in restoration plantings in tropical abandoned pastures?  
259 *Forest Ecology and Management* 303:35-45
- 260 69. Medlyn, B. E., F.-W. Badeck, D. G. G. De Pury, C. V. M. Barton, M. Broadmeadow, R.  
261 Ceulemans, P. De Angelis, M. Forstreuter, M. E. Jach, S. Kellomäki, E. Laitat, M. Marek,  
262 S. Philippot, A. Rey, J. Strassemeier, K. Laitinen, R. Liozon, B. Portier, P. Roberntz, K.  
263 Wang, and P. G. Jarvis. 1999. Effects of elevated CO<sub>2</sub> on photosynthesis in European  
264 forest species: a meta-analysis of model parameters. *Plant, Cell and Environment* 22:1475-  
265 1495.
- 266 70. Meir, P. & Levy, P. E. 2007 Photosynthetic parameters from two contrasting woody  
267 vegetation types in West Africa. *Plant Ecology*. 192, 2, p. 277-287 11 p.
- 268 71. Meir, P., Kruijt, B., Broadmeadow, M., Kull, O., Carswell, F. & Nobre, A. 2002  
269 Acclimation of photosynthetic capacity to irradiance in tree canopies in relation to leaf  
270 nitrogen concentration and leaf mass per unit area. *Plant, Cell and Environment*. 25, 3, p.  
271 343-357 15 p.
- 272 72. Messier, J., B. J. McGill, and M. J. Lechowicz. 2010. How do traits vary across ecological  
273 scales? A case for trait-based ecology. *Ecology Letters* 13:838-848.

- 274 73. Michaletz, S.T., and E.A. Johnson. 2006. A heat transfer model of crown scorch in forest  
275 fires. *Canadian Journal of Forest Research* 36(11): 2839-2851
- 276 74. Milla & Reich 2011 *Annals of Botany* 107: 455-465, 2011.
- 277 75. Miller JED, Ives AR, Harrison SP, Damschen EI (2018) Early and late flowering guilds  
278 respond differently to landscape spatial structure. *J Ecol.* 106:1033-1045.  
279 <https://doi.org/10.1111/1365-2745.12849>
- 280 76. Mori, A. S., Shiono, T., Haraguchi, T. F., Ota, A. T., Koide, D., Ohgoue, T., Kitagawa, R.,  
281 Maeshiro, R., Aung, T. T., Nakamori, T., Hagiwara, Y., Matsuoka, S., Ikeda, A., Hishi, T.,  
282 Hobara, S., Mizumachi, E., Frisch, A., Thor, G., Fujii, S., Osono, T. and Gustafsson, L.  
283 (2015), Functional redundancy of multiple forest taxa along an elevational gradient:  
284 predicting the consequences of non-random species loss. *J. Biogeogr.*, 42: 1383-1396.  
285 [doi:10.1111/jbi.12514](https://doi.org/10.1111/jbi.12514)
- 286 77. Muller, S. C., G. E. Overbeck, J. Pfadenhauer, and V. D. Pillar. 2007. Plant functional  
287 types of woody species related to fire disturbance in forest-grassland ecotones. *Plant*  
288 *Ecology* 189:1-14.
- 289 78. Niinemets, U. 2001. Global-scale climatic controls of leaf dry mass per area, density, and  
290 thickness in trees and shrubs. *Ecology* 82:453-469.
- 291 79. Nolan, R.H., Fairweather, K.A., Tarin, T., Santini, N.S., Cleverly, J., Faux, R. & Eamus,  
292 D. 2017, Divergence in plant water-use strategies in semiarid woody species, *Functional*  
293 *Plant Biology*, vol. 44, no. 11, pp. 1134-1146
- 294 80. Nolan, R.H., Tarin, T., Fairweather, K.A., Cleverly, J. and Eamus, D., 2017. Variation in  
295 photosynthetic traits related to access to water in semiarid Australian woody species. *Funct.*  
296 *Plant Biol.*, 44(11): 1087-1097
- 297 81. Ogaya, R. and J. Penuelas. 2003. Comparative field study of *Quercus ilex* and *Phillyrea*  
298 *latifolia*: photosynthetic response to experimental drought conditions. *Environmental and*  
299 *Experimental Botany* 50:137-148.

- 300 82. Onstein RE, Richard J. Carter, Yaowu Xing, H. Peter LinderInstitute (2014)  
301 Diversification rate shifts in the Cape Floristic Region: The right traits in the right place at  
302 the right time. *Perspectives in Plant Ecology, Evolution and Systematics* 16(6) 331-340  
303 DOI:10.1016/j.ppees.2014.08.002
- 304 83. Ordonez, J. C., P. M. van Bodegom, J. P. M. Witte, R. P. Bartholomeus, J. R. van Hal, and  
305 R. Aerts. 2010. Plant Strategies in Relation to Resource Supply in Mesic to Wet  
306 Environments: Does Theory Mirror Nature? *American Naturalist* 175:225-239.
- 307 84. Penuelas, J., J. Sardans, J. Llusia, S. Owen, J. Carnicer, T. W. Giambelluca, E. L. Rezende,  
308 M. Waite, and Ü. Niinemets. 2010. Faster returns on "leaf economics" and different  
309 biogeochemical niche in invasive compared with native plant species. *Global Change*  
310 *Biology* 16:2171-2185.
- 311 85. Petter G, Wagner K, Zotz G, Cabral JS, Wanek W, Sanchez Delgado EJ, Kreft H. 2016.  
312 Distribution of functional leaf traits of vascular epiphytes: vertical trends, intra- and  
313 interspecific trait variability, and phylogenetic signals. *Functional Ecology*, 30: 188-198.
- 314 86. Pierce S., Brusa G., Vagge I., Cerabolini B.E.L. (2013) Allocating CSR plant functional  
315 types: the use of leaf economics and size traits to classify woody and herbaceous vascular  
316 plants. *Functional Ecology*, 27(4): 1002-1010
- 317 87. Pierce S., Luzzaro A., Caccianiga M., Ceriani R.M. & Cerabolini B. 2007. Disturbance is  
318 the principal-scale filter determining niche differentiation, coexistence and biodiversity in  
319 an alpine community. *Journal of Ecology* 95: 698-706.
- 320 88. Pillar, V. D. and E. E. Sosinski. 2003. An improved method for searching plant functional  
321 types by numerical analysis. *Journal of Vegetation Science* 14:323-332.
- 322 89. Prentice, I.C., Meng, T., Wang, H., Harrison, S.P., Ni, J., Wang, G., 2011. Evidence for a  
323 universal scaling relationship of leaf CO<sub>2</sub> drawdown along a moisture gradient. *New*  
324 *Phytologist* 190: 169-180
- 325 90. Preston, K. A., W. K. Cornwell, and J. L. DeNoyer. 2006. Wood density and vessel traits  
326 as distinct correlates of ecological strategy in 51 California coast range angiosperms. *New*  
327 *Phytologist* 170:807-818.

- 328 91. Price, C.A. and B.J. Enquist. Scaling of mass and morphology in Dicotyledonous leaves:  
329 an extension of the WBE model. (2007) *Ecology* 88(5): 1132-1141.
- 330 92. Quero, J. L., R. Villar, T. Maranon, R. Zamora, D. Vega, and L. Sack. 2008. Relating leaf  
331 photosynthetic rate to whole-plant growth: drought and shade effects on seedlings of four  
332 *Quercus* species. *Functional Plant Biology* 35:725-737.
- 333 93. Quested, H. M., J. H. C. Cornelissen, M. C. Press, T. V. Callaghan, R. Aerts, F. Trosien,  
334 P. Riemann, D. Gwynn-Jones, A. Kondratchuk, and S. E. Jonasson. 2003. Decomposition  
335 of sub-arctic plants with differing nitrogen economies: A functional role for hemiparasites.  
336 *Ecology* 84:3209-3221.
- 337 94. Reich, P. B., J. Oleksyn, and I. J. Wright. 2009. Leaf phosphorus influences the  
338 photosynthesis-nitrogen relation: a cross-biome analysis of 314 species. *Oecologia*  
339 160:207-212.
- 340 95. Reich, P. B., M. G. Tjoelker, K. S. Pregitzer, I. J. Wright, J. Oleksyn, and J. L. Machado.  
341 2008. Scaling of respiration to nitrogen in leaves, stems and roots of higher land plants.  
342 *Ecology Letters* 11:793-801.
- 343 96. Rodrigues, A.V.; Bones, F.L.V.; Schneiders, A.; Oliveira, L.Z.; Vibrans, A.C.; Gasper,  
344 A.L. Plant Trait Dataset for Tree-Like Growth Forms Species of the Subtropical Atlantic  
345 Rain Forest in Brazil. *Data* 2018, 3, 16.
- 346 97. Rolo V., López-Díaz M. L. and Moreno G. (2012) Shrubs affect soil nutrients availability  
347 with contrasting consequences for pasture understory and tree overstory production and  
348 nutrient status in Mediterranean grazed open woodlands. *Nutrient Cycling in*  
349 *Agroecosystems*, 1-14
- 350 98. Rolo, V., Olivier, P. and van Aarde, R. (2016) Seeded pioneer die-offs reduce the  
351 functional trait space of new-growth coastal dune forests. *Forest Ecology and Management*,  
352 377, 26-35.
- 353 99. Rosell, J. A. (2016), Bark thickness across the angiosperms: more than just fire. *New*  
354 *Phytol*, 211: 90-102. doi:10.1111/nph.13889

- 355 100. Rosell, J. A., Olson, M. E., Anfodillo, T. and Martínez-Méndez, N. (2017),  
356 Exploring the bark thickness-stem diameter relationship: clues from lianas, successive  
357 cambia, monocots and gymnosperms. *New Phytol*, 215: 569-581. doi:10.1111/nph.14628
- 358 101. Sack, L. 2004. Responses of temperate woody seedlings to shade and drought: do  
359 trade-offs limit potential niche differentiation? *Oikos* 107:110-127.
- 360 102. Sack, L., P. D. Cowan, N. Jaikumar, and N. M. Holbrook. 2003. The 'hydrology' of  
361 leaves: co-ordination of structure and function in temperate woody species. *Plant Cell and*  
362 *Environment* 26:1343-1356.
- 363 103. Scalon, M.C., Haridasan, M. & Franco, A.C. *Plant Soil* (2017).  
364 <https://doi.org/10.1007/s11104-017-3437-0>
- 365 104. Scherer-Lorenzen, M., Schulze, E.-D., Don, A., Schumacher, J. & Weller, E. (2007)  
366 Exploring the functional significance of forest diversity: A new long-term experiment with  
367 temperate tree species (BIOTREE). *Perspectives in Plant Ecology, Evolution and*  
368 *Systematics*, 9, 53-70.
- 369 105. Schurr, F.M., Midgley, G.F., Rebelo, A.G., Reeves, G., Poschlod, P. & Higgins, S.I.  
370 (2007) *Global Ecology and Biogeography*, 16, 449-459.
- 371 106. Seymour, C.L., Milewski, A.V., Mills, A.J., Joseph, G.S., Cumming, G.S.,  
372 Cumming, D.H.M., & Mahlangu, Z. 2014. Do the large termite mounds of *Macrotermes*  
373 concentrate micronutrients in addition to macronutrients in nutrient-poor African  
374 savannas? *Soil Biology and Biochemistry* 68: 95-105.
- 375 107. Shiodera, S., J. S. Rahajoe, and T. Kohyama. 2008. Variation in longevity and traits  
376 of leaves among co-occurring understorey plants in a tropical montane forest. *Journal of*  
377 *Tropical Ecology* 24:121-133.
- 378 108. Shipley, B. and T. T. Vu. 2002. Dry matter content as a measure of dry matter  
379 concentration in plants and their parts. *New Phytologist* 153:359-364.

- 380 109. Smith, N. G. and Dukes, J. S. (2017), LCE: leaf carbon exchange data set for  
381 tropical, temperate, and boreal species of North and Central America. *Ecology*, 98: 2978.  
382 doi:10.1002/ecy.1992
- 383 110. Souza K, Higuchi P, Silva Ac, Schimalski Mb, Loebens R, Buzzi Junior F, Souza  
384 Cc, Rodrigues Junior Lc, Walter Ff, Missio Ff, Dalla Rosa A. (2017) Partição de nicho por  
385 grupos funcionais de espécies arbóreas em uma floresta subtropical. *Rodriguésia* [online]  
386 vol.68, n.4, pp.1165-1175. ISSN 0370-6583. [http://dx.doi.org/10.1590/2175-](http://dx.doi.org/10.1590/2175-7860201768401)  
387 7860201768401
- 388 111. Spasojevic, M. J., Turner, B. L., and Myers, J. A. (2016) When does intraspecific  
389 trait variation contribute to functional beta?diversity? *J Ecol*, 104: 487-496.  
390 doi:10.1111/1365-2745.12518
- 391 112. Swaine, E. K. 2007. Ecological and evolutionary drivers of plant community  
392 assembly in a Bornean rain forest. PhD Thesis, University of Aberdeen, Aberdeen.
- 393 113. Takkis, K. 2014. Changes in plant species richness and population performance in  
394 response to habitat loss and fragmentation. *Dissertationes Biologicae Universitatis*  
395 *Tartuensis* 255, 2014-04-07. Available from: <http://hdl.handle.net/10062/39546>
- 396 114. Tamir Klein, Giovanni Di Matteo, Eyal Rotenberg, Shabtai Cohen, Dan Yakir  
397 (2012) Differential ecophysiological response of a major Mediterranean pine species  
398 across a climatic gradient. *Tree Physiology* 33 (1): 26-36. doi: 10.1093/treephys/tps116
- 399 115. Thuiller W - Traits of European Alpine Flora - Wilfried Thuiller - OriginAlps  
400 Project - Centre National de la Recherche Scientifique
- 401 116. Tomas F. Domingues, Luiz A. Martinelli, James R. Ehleringer (2007)  
402 Ecophysiological traits of plant functional groups in forest and pasture ecosystems from  
403 eastern Amazonia, Brazil. *Plant Ecol* (2007) 193:101-112 DOI 10.1007/s11258-006-9251-  
404 z
- 405 117. van de Weg MJ, Meir P, Grace J, Atkin O (2009) Altitudinal variation in leaf mass  
406 per unit area, leaf tissue density and foliar nitrogen and phosphorus content along the  
407 Amazon-Andes gradient in Peru, *Plant Ecology & Diversity*, 2: 3, 243-254

- 408 118. van de Weg MJ, Patrick Meir John Grace, Guilmair Damian Ramos (2011)  
409 Photosynthetic parameters, dark respiration and leaf traits in the canopy of a Peruvian  
410 tropical montane cloud forest *Oecologia* DOI 10.1007/s00442-011-2068-z
- 411 119. van der Plas, F. & Olf, H. (2014) Mesoherbivores affect grasshopper communities  
412 in a megaherbivore-dominated South African savannah. *Oecologia* 175: 639.  
413 doi:10.1007/s00442-014-2920-z
- 414 120. Vergutz, L., S. Manzoni, A. Porporato, R.F. Novais, and R.B. Jackson. 2012. A  
415 Global Database of Carbon and Nutrient Concentrations of Green and Senesced Leaves.  
416 Data set. Available on-line [<http://daac.ornl.gov>] from Oak Ridge National Laboratory  
417 Distributed Active Archive Center, Oak Ridge, Tennessee, U.S.A.  
418 <http://dx.doi.org/10.3334/ORNLDAAC/1106>
- 419 121. Walker, A.P. 2014. A Global Data Set of Leaf Photosynthetic Rates, Leaf N and P,  
420 and Specific Leaf Area. Data set. Available on-line [<http://daac.ornl.gov>] from Oak Ridge  
421 National Laboratory Distributed Active Archive Center, Oak Ridge, Tennessee, USA.  
422 <http://dx.doi.org/10.3334/ORNLDAAC/1224>
- 423 122. Wang, Han; Harrison, Sandy P; Prentice, Iain Colin; Yang, Yanzheng; Bai, Fan;  
424 Furstenau Togashi, Henrique; Wang, Meng; Zhou, Shuangxi; Ni, Jian (2017): The China  
425 Plant Trait Database. PANGAEA, <https://doi.org/10.1594/PANGAEA.871819>
- 426 123. Wenxuan Han, Yahan Chen, Fang-Jie Zhao, Luying Tang, Rongfeng Jiang and  
427 Fusuo Zhang, 2012, Floral, climatic and soil pH controls on leaf ash content in China's  
428 terrestrial plants. *Global Ecology and Biogeography*, DOI: 10.1111/j.1466-  
429 8238.2011.00677.x
- 430 124. Williams, M., Y.E. Shimabokuro and E.B. Rastetter. 2012. LBA-ECO CD-09 Soil  
431 and Vegetation Characteristics, Tapajos National Forest, Brazil. Data set. Available on-  
432 line [<http://daac.ornl.gov>] from Oak Ridge National Laboratory Distributed Active Archive  
433 Center, Oak Ridge, Tennessee, U.S.A. <http://dx.doi.org/10.3334/ORNLDAAC/1104>



- 434 125. Wilson K., D. Baldocchi, P. Hanson (2000) Spatial and seasonal variability of  
435 photosynthetic parameters and their relationship to leaf nitrogen in a deciduous forest. *Tree*  
436 *Physiology* 20, 565-578
- 437 126. Wirth, C. and J. W. Lichstein. 2009. The Imprint of Species Turnover on Old-  
438 Growth Forest Carbon Balances - Insights From a Trait-Based Model of Forest Dynamics.  
439 Pages 81-113 in C. Wirth, G. Gleixner, and M. Heimann, editors. *Old-Growth Forests:*  
440 *Function, Fate and Value*. Springer, New York, Berlin, Heidelberg.
- 441 127. Wright, I. J., D. D. Ackerly, F. Bongers, K. E. Harms, G. Ibarra-Manriquez, M.  
442 Martinez-Ramos, S. J. Mazer, H. C. Muller-Landau, H. Paz, N. C. A. Pitman, L. Poorter,  
443 M. R. Silman, C. F. Vriesendorp, C. O. Webb, M. Westoby, and S. J. Wright. 2007.  
444 Relationships among ecologically important dimensions of plant trait variation in seven  
445 Neotropical forests. *Annals of Botany* 99:1003-1015.
- 446 128. Wright, I. J., P. B. Reich, M. Westoby, D. D. Ackerly, Z. Baruch, F. Bongers, J.  
447 Cavender-Bares, T. Chapin, J. H. C. Cornelissen, M. Diemer, J. Flexas, E. Garnier, P. K.  
448 Groom, J. Gulias, K. Hikosaka, B. B. Lamont, T. Lee, W. Lee, C. Lusk, J. J. Midgley, M.  
449 L. Navas, U. Niinemets, J. Oleksyn, N. Osada, H. Poorter, P. Poot, L. Prior, V. I. Pyankov,  
450 C. Roumet, S. C. Thomas, M. G. Tjoelker, E. J. Veneklaas, and R. Villar. 2004. The  
451 worldwide leaf economics spectrum. *Nature* 428:821-827.
- 452 129. Wright, S. J., K. Kitajima, N. J. B. Kraft, P. B. Reich, I. J. Wright, D. E. Bunker,  
453 R. Condit, J. W. Dalling, S. J. Davies, S. Díaz, B. M. J. Engelbrecht, K. E. Harms, S. P.  
454 Hubbell, C. O. Marks, M. C. Ruiz-Jaen, C. M. Salvador, and A. E. Zanne. 2011 . Functional  
455 traits and the growth-mortality tradeoff in tropical trees. *Ecology* 91:3664-3674.
- 456 130. Yahan Chen , Wenxuan Han , Luying Tang , Zhiyao Tang and Jingyun Fang 2011  
457 Leaf nitrogen and phosphorus concentrations of woody plants differ in responses to  
458 climate, soil and plant growth form. *Ecography* 34, doi: 10.1111/j.1600-  
459 0587.2011.06833.x
- 460 131. Yguel B., Bailey R., Tosh N.D., Vialatte A., Vasseur C., Vitrac X., Jean F. &  
461 Prinzing A. (2011). Phytophagy on phylogenetically isolated trees: why hosts should  
462 escape their relatives. *Ecol. Lett.*, 14, 1117-1124.
