# Supplementary material for: Global relationships in tree functional traits
Source: Nat Commun. 2022 Jun 8;13:3185. doi: 10.1038/s41467-022-30888-2 (PMC9177664; doi:10.1038/s41467-022-30888-2)
Supplement: Supplementary file 3 — Supplementary Data 2 [file 41467_2022_30888_MOESM3_ESM.xlsx]

## Sheet: Fig_2a_S10
Trait	PC1	PC2	PC3	PC4	PC5	PC6	PC7	PC8	PC9	PC10	PC11	PC12	PC13	PC14	PC15	PC16	PC17	PC18	Fit
% Variance Explained	24.8	16.3	11.4	9.3	5.3	5.2	4.3	4	3.5	2.9	2.6	2.2	2.1	1.9	1.4	1.3	0.8	0.7	Both
Bark thickness	-0.250105	0.0581644	-0.49774	-0.454303	0.171985	-0.0604071	-0.0524131	-0.027601	0.0669012	-0.541791	-0.0347706	0.106964	0.0590626	0.0962348	0.100723	-0.0383793	-0.0393205	-0.023543	Both
Conduit diam.	0.717735	0.265317	-0.473609	0.0258579	-0.103553	-0.0360802	-0.147406	0.0468979	-0.0140386	0.0931943	-0.134081	-0.0720631	0.120353	-0.0226925	-0.0118204	-0.358045	0.0173392	0.091164	Both
Crown diameter	0.0993094	0.876639	0.144507	-0.0830892	-0.0782245	-0.0641354	0.138359	0.0705709	0.14117	0.0261671	-0.131342	-0.0127552	-0.0814572	0.109538	-0.0377508	-0.0668685	0.113051	-0.238591	Both
Crown height	-0.194063	0.753338	0.250627	-0.290294	0.101971	-0.0823694	0.179902	0.0144422	0.154562	0.101451	-0.141567	0.0718629	-0.207349	0.140526	0.0466091	0.0217585	-0.0798818	0.201545	Both
Leaf area	0.686522	0.457293	-0.309107	0.0587863	-0.190766	0.269431	-0.20165	-0.0969283	-0.0549879	-0.124465	-0.192767	-0.302316	-0.0738458	-0.0479115	0.0156113	0.232499	-0.0235584	0.0202784	Both
Leaf density	-0.277236	0.196376	-0.594056	0.264718	0.447014	0.225464	-0.0833045	-0.0752088	0.424062	0.178813	0.114792	0.0101085	0.0764327	-0.000298481	0.0156794	0.0685004	0.0928795	0.0147886	Both
Leaf K	0.558641	-0.519769	-0.0309303	-0.211558	0.1727	-0.198083	0.0448417	0.0899972	-0.00983264	0.120218	0.0226494	-0.232901	0.109636	0.416314	0.00699561	0.0609468	0.00338123	-0.00916336	Both
Leaf N	0.732813	0.134699	0.142315	-0.00610397	0.0903792	-0.256243	0.174439	0.14764	0.0924145	0.0372857	-0.210442	0.173043	0.350131	-0.16654	0.0878375	0.148948	-0.0237648	-0.00132085	Both
Leaf P	0.56186	-0.30201	0.130125	-0.25101	0.401995	-0.243209	0.110048	0.130599	0.150597	-0.0892633	0.0576539	-0.229897	-0.246094	-0.268225	-0.0223743	-0.0510802	0.0231685	-0.00944352	Both
Leaf thickness	-0.76864	-0.0965587	-0.187599	-0.327479	-0.158181	-0.0664886	0.0029785	0.372688	-0.0529176	-0.0271949	-0.13253	-0.0676909	0.0669705	-0.0464702	-0.167451	0.0776953	0.209062	0.0893812	Both
Leaf Vcmax	0.747754	-0.182377	-0.383778	-0.101697	-0.0378653	-0.0564772	0.037227	-0.123273	0.044364	0.00450619	-0.00559174	0.273203	-0.125896	0.0407724	-0.35864	0.0678875	-0.0370913	-0.00501417	Both
Root depth	-0.187648	0.125381	-0.339625	0.412222	-0.366222	-0.702835	-0.0446798	-0.1002	0.154672	-0.0399963	0.148115	-0.0513891	-0.0675287	0.00340299	0.0586798	0.058481	0.0143872	0.0241009	Both
Seed dry mass	0.00482023	0.454581	0.00630146	0.348203	0.449441	-0.225884	-0.412116	0.253268	-0.372923	0.00149208	0.00168957	0.102602	-0.0741461	0.0409713	-0.0240976	0.0392466	-0.00212672	-0.010658	Both
Specific leaf area	0.738139	0.0241308	0.392077	0.129759	0.0308988	0.0491446	0.0231899	-0.266569	-0.0764665	-0.178291	0.0975116	0.118888	-0.0282117	0.0657489	0.0767692	0.00374479	0.26285	0.0920677	Both
Stem diameter	-0.221401	0.0191696	-0.313607	-0.667553	0.0849789	-0.194208	-0.084973	-0.418277	-0.253934	0.285498	-0.0573875	0.0269756	-0.0187618	-0.0976485	0.0973487	0.0378314	0.0528996	-0.042165	Both
Stomatal conduct.	0.524929	0.151158	-0.478084	-0.213277	-0.196187	0.177606	0.194632	0.384592	-0.134984	0.10037	0.318572	0.122947	-0.115598	-0.0104133	0.174239	0.0462903	0.0102994	-0.0082787	Both
Tree height	0.0121049	0.771237	0.229397	-0.297515	0.0335615	-0.0352281	0.0219399	-0.0966942	-0.0626951	-0.0589434	0.402368	-0.146641	0.244719	-0.0466857	-0.171734	0.00637822	-0.0433186	0.029282	Both
Wood density	-0.253367	0.132858	-0.416292	0.440309	0.214544	-0.00807083	0.614989	-0.122903	-0.31601	-0.0648987	-0.077984	-0.100652	0.0147613	0.000590399	-0.0413942	-0.0161785	0.00247979	0.0127069	Both

## Sheet: Fig_2b_S11
% Variance Explained	22.4	17.1	12.4	8.3	5.5	5.3	4.4	4.2	3.5	2.9	2.6	2.4	2.2	1.9	1.6	1.5	0.9	0.7	Angio
Bark thickness	-0.123821	0.101633	-0.71531	0.111348	0.0690655	-0.138649	0.0778558	-0.169615	-0.0535658	-0.0999241	0.337112	-0.299527	-0.247756	0.0321807	0.106038	0.00388307	-0.0379586	0.0221211	Angio
Conduit diam.	0.536786	0.314211	-0.527147	-0.144043	0.0550685	0.0979474	0.184694	0.0626769	0.0199565	-0.146613	-0.0690589	-0.130595	0.117076	-0.0424178	-0.332021	-0.203684	0.0127867	-0.0683997	Angio
Crown diameter	0.0263345	0.893179	0.111721	0.0767186	0.0855159	0.120971	-0.10778	0.0348981	0.148754	-0.115786	-0.0262262	0.0486515	-0.107937	0.0868161	-0.0767715	-0.00511619	0.0741221	0.262974	Angio
Crown height	-0.14206	0.790005	0.137827	0.271033	0.137529	-0.0913971	-0.181916	0.0326157	0.185132	-0.0942672	-0.104949	0.106579	-0.244303	0.0954163	0.0185729	-0.0287263	-0.0401889	-0.215834	Angio
Leaf area	0.523321	0.540797	-0.298602	-0.15762	-0.388299	0.12376	0.198206	-0.204558	-0.123124	-0.21872	0.0995245	0.31192	0.111803	0.0122436	0.169253	0.0400398	-0.0205703	-0.0257541	Angio
Leaf density	-0.403137	0.144269	-0.431992	-0.476305	-0.125872	-0.436266	0.0250472	-0.0498353	0.455851	0.13972	-0.0589897	0.00967087	0.117096	0.0330345	0.0620625	0.0152654	0.10794	-0.00546526	Angio
Leaf K	0.584434	-0.496114	-0.121073	0.137321	0.231888	-0.141179	-0.0383854	0.157308	0.041417	-0.0426723	0.135257	0.124142	0.107847	0.453719	0.00130759	-0.0371271	-2.95687e-05	0.00773301	Angio
Leaf N	0.71144	0.189358	0.100137	-0.0764785	0.301488	0.0504331	-0.119931	0.149957	0.111071	-0.214337	-0.149585	-0.267803	0.198534	-0.0870795	0.275067	0.0420527	-0.0228413	-0.00384873	Angio
Leaf P	0.677985	-0.226042	-0.0256202	0.0692547	0.302022	-0.272867	-0.0656559	0.13955	0.143031	-0.0347022	0.255925	0.258205	-0.0801385	-0.323407	-0.0549952	0.0271621	0.0247353	0.0146187	Angio
Leaf thickness	-0.667225	-0.103609	-0.35764	0.309366	0.0368632	0.242826	0.0981404	0.334988	-0.026098	-0.191007	0.0353047	0.025092	0.0652901	-0.0182779	-0.00421358	0.191109	0.219434	-0.0563393	Angio
Leaf Vcmax	0.686195	-0.163356	-0.438969	-0.1025	0.0750996	0.0707092	-0.0612054	-0.185465	-0.00150253	0.0954078	-0.255405	0.00135125	-0.142709	0.043293	-0.120059	0.348884	-0.0316459	0.000730076	Angio
Root depth	-0.380499	0.0378162	-0.118382	-0.347814	0.625699	0.47987	0.0991368	-0.273997	0.0577827	0.149316	0.0744441	0.125018	0.0238413	0.00882965	0.064584	-0.0554662	0.0167398	-0.0263627	Angio
Seed dry mass	-0.0854541	0.433757	0.127971	-0.395043	0.262421	-0.340503	0.421278	0.321685	-0.356745	0.0747578	-0.0920666	0.0261388	-0.0994072	0.0374879	0.0370906	0.0472614	-0.00474104	0.0103293	Angio
Specific leaf area	0.727257	0.067103	0.411419	-0.0836586	-0.049328	-0.0477639	-0.0576889	-0.252973	-0.155467	0.0968754	0.0526616	-0.110996	-0.0959317	0.0364808	0.0235482	-0.0504615	0.295759	-0.0596526	Angio
Stem diameter	-0.18755	0.00949139	-0.486411	0.585488	0.222957	-0.303739	-0.058542	-0.260257	-0.230009	0.0377515	-0.274145	0.109027	0.114449	-0.0644425	0.0704835	-0.117745	0.04652	0.0475623	Angio
Stomatal conduct.	0.414406	0.175451	-0.553696	0.0233819	-0.184497	0.268577	-0.207629	0.394893	-0.0555139	0.395786	-0.021862	0.0351616	-0.091943	-0.0252845	0.129984	-0.118234	0.0109188	0.00542922	Angio
Tree height	0.0191435	0.797822	0.118983	0.291722	0.0677804	-0.0829903	-0.0683157	-0.0459944	-0.0701093	0.295203	0.250634	-0.0890769	0.303404	0.00626699	-0.0960575	0.162658	-0.0408708	-0.0355516	Angio
Wood density	-0.391977	0.0620574	-0.191997	-0.539031	0.0500709	-0.102365	-0.626734	0.0275421	-0.312355	-0.165765	0.0601899	0.0398657	0.0536736	0.00667854	-0.0629394	0.0102616	0.0037425	-0.0126122	Angio

## Sheet: Fig_2c_S12
% Variance Explained	22.5	18.4	12	8.6	7.2	5.4	3.6	3.2	3.1	2.7	2.6	2.1	2	1.6	1.6	1.5	1.1	0.8	Gymno
Bark thickness	0.0748052	0.447102	-0.062389	-0.0734309	-0.304321	0.195794	-0.032792	0.310915	0.0162348	0.418733	-0.0372271	0.0876881	0.101657	-0.138418	-0.204124	0.0538765	-0.0568381	0.00406985	Gymno
Conduit diam.	0.397889	-0.0961762	-0.46296	0.266289	0.00539871	-0.340095	-0.107498	-0.0427737	0.0151204	0.239878	0.0723207	0.269464	0.0820027	0.0836121	0.2408	-0.0744696	-0.127953	-0.00620464	Gymno
Crown diameter	0.539901	0.679956	-0.0581749	-0.102773	-0.0126015	-0.0966308	-0.0221399	-0.294832	-0.0652898	-0.0663694	0.030482	0.0869732	0.183388	0.0966651	-0.148411	0.0376781	0.0670101	0.229702	Gymno
Crown height	0.446557	0.802112	0.328729	0.0599796	-0.0406341	-0.0507128	0.0425527	-0.0946665	0.0251078	0.00199705	-0.122052	0.0766597	0.0708858	0.151551	-0.0226154	-0.0226743	0.112999	-0.268303	Gymno
Leaf area	-0.0480531	-0.0695489	-0.654852	0.119273	-0.141831	-0.0669472	0.154295	-0.0591387	-0.111399	-0.130925	0.148669	0.121889	0.0867275	-0.302481	-0.0207697	-0.0366377	0.20223	-0.0728609	Gymno
Leaf density	0.0128723	-0.122888	0.0947819	-0.679727	-0.148838	-0.38187	-0.407363	-0.0762529	0.2405	-0.0252423	0.118015	0.0474752	-0.104121	-0.0834628	-0.0981897	-0.062157	0.0136068	-0.0472117	Gymno
Leaf K	0.816481	-0.248999	0.150102	0.235347	-0.251926	-0.146828	-0.166683	0.00683211	-0.313536	0.130102	0.256362	-0.33048	-0.00788718	0.0212675	-0.016268	-0.00168779	0.0386556	-0.0280098	Gymno
Leaf N	0.560144	-0.253209	0.073123	0.278191	-0.36626	0.319536	-0.03816	-0.203337	0.478811	-0.0341895	-0.00615145	-0.108677	0.136703	-0.0946393	0.0860283	0.0416737	-0.0211914	0.00285019	Gymno
Leaf P	0.549999	-0.146661	0.588013	0.352605	-0.230551	0.120736	0.00258291	0.0507359	-0.0797856	-0.167718	0.0939924	0.329064	-0.263625	-0.0576086	-0.0746333	-0.0228631	-0.0411021	0.0342218	Gymno
Leaf thickness	-0.511365	0.332389	0.592193	0.081043	-0.266449	-0.123619	-0.00815423	0.194329	0.0265891	-0.00335054	-0.00163857	-0.0307069	0.138212	-0.0431129	0.168107	-0.283681	0.112174	0.0995255	Gymno
Leaf Vcmax	0.719988	-0.529377	-0.114463	-0.362302	-0.0339085	0.111931	0.0494997	0.154782	0.0309955	0.148297	-0.194875	0.0642744	-0.121935	0.0967985	0.122181	0.0440923	0.257084	0.0671898	Gymno
Root depth	-0.538161	0.122823	-0.496674	0.0974043	-0.345667	0.213855	0.0788784	-0.00552176	0.150414	0.0444773	0.274108	-0.00494224	-0.16324	0.280505	-0.0940577	-0.119658	0.0592873	0.00219535	Gymno
Seed dry mass	-0.0840336	0.100421	-0.50416	0.216623	-0.451712	0.00212017	-0.369509	0.0998994	-0.141161	-0.238848	-0.368916	-0.0347648	-0.0192879	0.0467996	-0.0167422	-0.0129991	-0.029854	0.00451192	Gymno
Specific leaf area	0.683185	-0.283547	-0.20738	-0.134387	0.404896	0.330046	-0.058666	0.0477728	-0.0257753	-0.0593624	-0.0348397	-0.0112145	0.0940902	-0.000802127	-0.12599	-0.349315	-0.0625453	-0.0247725	Gymno
Stem diameter	0.217328	0.910267	-0.215879	0.0591183	0.138644	0.0503604	0.00940143	-0.185076	0.0254426	0.146204	-0.0972449	-0.13667	-0.344942	-0.171764	0.104317	-0.0974221	-0.0116814	0.0412516	Gymno
Stomatal conduct.	0.48064	-0.0158348	-0.116366	-0.395362	-0.451124	-0.292054	0.503729	0.0553425	0.000274824	-0.112612	-0.0846875	-0.0804905	-0.0208682	0.00920578	-0.00915657	-0.0634199	-0.153098	-0.00335547	Gymno
Tree height	0.496997	0.707507	-0.213287	-0.160127	0.179431	0.0994992	-0.0834686	0.406693	0.100236	-0.265945	0.242764	-0.0285275	0.0213632	0.0110834	0.14235	0.111809	-0.0256165	0.00692585	Gymno
Wood density	-0.211704	0.0893289	0.0945267	-0.577688	-0.299469	0.483506	-0.0750063	-0.217211	-0.29536	0.0102168	0.0893453	0.0818682	0.0540166	-0.0103206	0.193104	0.0119669	-0.0672071	-0.0364955	Gymno

## Sheet: Figure_S13
Trait	PC1	PC2	PC3	PC4	PC5	PC6	PC7	PC8	PC9	PC10	PC11	PC12	PC13	PC14	PC15	PC16	PC17	PC18
% Variance Explained	17.2	12.2	10.1	8.1	6.5	6.1	5.2	4.6	4	3.7	3.6	3.3	3	3	2.6	2.5	2.2	2.1
Bark thickness	-0.34956	0.184575	0.347853	-0.0847171	-0.273552	-0.18704	-0.0232704	0.630449	-0.0622385	-0.00163041	0.299023	0.109625	-0.113852	0.172138	-0.0957148	0.0325941	-0.124867	-0.00954345
Conduit diam.	0.583026	0.480954	0.0112292	-0.190491	0.0196299	-0.156163	-0.0692	-0.022359	0.31796	-0.0108823	-0.13226	-0.105527	-0.332556	-0.00553065	-0.0495926	-0.251704	-0.156504	-0.22383
Crown diameter	0.0214289	0.517576	-0.080545	0.265613	0.581669	0.00393977	0.230871	0.245943	-0.00322289	-0.0787743	0.0801608	-0.0591669	0.00484627	0.0363468	-0.0954567	-0.218841	0.291393	0.128244
Crown height	-0.140726	0.646144	0.187817	0.289415	0.438145	0.0515086	0.0927033	-0.0292289	0.0628925	-0.0534368	-0.0440979	0.104007	0.146484	-0.00432226	0.133488	0.308798	-0.274868	-0.126828
Leaf area	0.575664	0.191738	-0.307395	-0.0665495	-0.276716	-0.3616	0.164897	0.0891298	0.281935	-0.148885	0.248632	-0.00774615	0.180719	-0.313617	0.0507275	0.182963	0.120097	0.0148242
Leaf density	-0.126204	0.422506	-0.16228	-0.453653	-0.143373	0.635617	-0.135533	0.308433	0.0735912	0.0840792	-0.139275	-0.064985	0.044405	-0.100544	0.245986	0.0303814	0.114529	-0.00845795
Leaf K	0.410319	-0.288357	0.439799	-0.0374443	0.199259	0.0945632	-0.392861	0.0272512	0.0763246	-0.201898	0.270707	-0.315025	0.288992	0.10483	0.11585	-0.115692	-0.0488358	-0.0422224
Leaf N	0.70006	0.11803	-0.00400781	0.214888	-0.0171513	-0.0881409	-0.112259	0.043694	-0.31302	-0.00781608	0.0248659	0.0754582	-0.220343	-0.0844805	0.356523	-0.0581632	-0.128039	0.28139
Leaf P	0.456711	-0.0347909	0.430972	0.198999	-0.00735323	0.208986	-0.363777	0.104477	-0.0462671	-0.230818	-0.189715	0.309381	-0.0316638	-0.241022	-0.268032	0.0686454	0.114352	-0.0295485
Leaf thickness	-0.715385	-0.133461	0.318998	0.0112717	0.0285167	-0.279899	-0.0399153	-0.0683546	0.0444673	-0.233585	-0.0114485	0.170627	-0.126383	-0.0864444	0.365844	-0.0967564	0.214968	-0.188226
Leaf Vcmax	0.367243	0.127476	0.420484	-0.466014	0.0532845	0.215941	0.22399	-0.313866	0.142449	0.0829771	0.278798	0.375998	-0.00168806	0.168433	0.0177156	-0.0336388	0.0540418	0.0934017
Root depth	-0.0520543	0.391537	0.224839	-0.256389	0.112286	-0.500715	-0.441955	-0.0604584	-0.00726048	0.3977	-0.151959	-0.0150494	0.118659	0.0460702	-0.0140206	0.0960703	0.14813	0.0987637
Seed dry mass	-0.00942065	0.492803	-0.449222	0.112349	-0.299199	-0.00769752	-0.264632	-0.182404	-0.0143657	-0.376773	-0.0283288	0.0584049	0.0131711	0.417363	-0.00999005	0.0650934	0.0877511	0.0373866
Specific leaf area	0.653187	-0.00910965	-0.0862	0.336267	-0.100147	0.0782666	0.0469006	0.0414253	-0.261573	0.305231	0.129695	0.0380182	0.0131246	0.144055	0.0772405	0.0543462	0.190241	-0.359454
Stem diameter	-0.16333	0.387307	0.567644	0.0970403	-0.229708	0.134106	0.116961	-0.254115	-0.111162	-0.0394092	0.127181	-0.393814	-0.26067	-0.0885772	-0.0726058	0.194786	0.122546	0.0448443
Stomatal conduct.	0.423762	-0.00125913	0.299693	-0.473463	-0.029803	-0.207469	0.393445	0.112959	-0.317956	-0.237577	-0.361147	-0.0877351	0.162066	0.109841	0.00977124	0.0248916	0.0137403	-0.0475358
Tree height	-0.247077	0.530732	0.231344	0.290293	-0.455232	0.022667	0.0799324	-0.1367	-0.103384	0.0814362	-0.0225959	0.0577127	0.33191	-0.14014	-0.0185191	-0.347515	-0.0917806	-0.00369893
Wood density	-0.222478	0.260335	-0.384925	-0.48125	0.229955	-0.0327566	-0.17703	-0.150378	-0.443175	-0.110384	0.287981	0.0306674	-0.0224626	-0.220083	-0.120377	-0.0462494	-0.0681707	-0.128906

## Sheet: Figure_S14
Trait	PC1	PC2	PC3	PC4	PC5	PC6	PC7	PC8	PC9	PC10	PC11	PC12	PC13	PC14	PC15	PC16	PC17	PC18
% Variance Explained	17	13.1	9.9	7.4	6.8	6.3	5.3	4.7	4	3.8	3.4	3.4	3.2	3	2.7	2.4	2	1.9
Bark thickness	-0.376533	0.180081	-0.456275	-0.193449	-0.116778	-0.219593	0.0594313	0.539983	-0.272031	0.111632	-0.1634	0.182751	-0.178061	-0.0595756	0.110249	-0.0191638	-0.16464	-0.0420627
Conduit diam.	0.408529	0.568541	-0.138035	0.142061	-0.168159	-0.0890037	0.126913	0.0161463	0.374797	-0.184655	-0.285895	-0.0081245	-0.197301	-0.0959894	-0.243892	0.129279	-0.108447	0.159979
Crown diameter	-0.0384895	0.444032	0.229427	-0.0790128	0.722474	0.0231981	0.0374986	0.199601	-0.0741496	-0.0371024	0.0134577	0.0526473	-0.143291	-0.166705	-0.217054	-0.0681313	0.245766	-0.091734
Crown height	-0.0169573	0.659068	0.0318978	-0.0933729	0.535556	0.0177324	0.0420145	-0.0258874	0.161391	0.0632884	0.163505	-0.0185374	0.126986	0.160918	0.283668	0.0607906	-0.264768	0.112339
Leaf area	0.484142	0.307795	0.234138	0.0750778	-0.234243	-0.33195	-0.225975	0.269798	0.191405	0.166324	0.0756236	0.349481	0.299679	0.0789786	0.0192712	-0.0272226	0.177868	0.0233553
Leaf density	-0.241937	0.384106	0.0540683	0.237841	-0.220586	0.608753	0.11052	0.376543	-0.0885161	-0.0962568	-0.0529467	-0.20289	0.160449	0.107025	0.0847479	0.155085	0.167177	0.061251
Leaf K	0.420211	-0.258815	-0.498519	-0.0534579	0.129512	0.183383	0.375378	0.00498195	-0.103281	0.0823784	0.191262	0.240002	-0.00931108	0.351153	-0.256258	0.0814199	0.0192876	0.0776036
Leaf N	0.779184	0.186523	0.0399694	-0.0823762	-0.0293326	-0.0846644	0.070472	-0.114019	-0.212163	-0.0479423	-0.00865296	-0.00349509	0.00997694	-0.0868697	0.112828	0.409095	-0.00910268	-0.297468
Leaf P	0.570466	0.0145236	-0.370487	-0.206507	-0.0665272	0.106683	0.402241	0.0579568	0.0563883	-0.108764	0.130509	-0.0724634	0.253331	-0.373807	0.0953291	-0.251225	0.00478195	0.00791569
Leaf thickness	-0.63358	-0.161911	-0.437377	-0.0592046	0.0661428	-0.239356	0.0808043	-0.110011	0.156819	0.0498555	0.134494	0.0470059	-0.0177847	-0.203021	0.14234	0.308644	0.247826	0.177227
Leaf Vcmax	0.265666	0.11569	-0.414965	0.452675	0.0693713	0.382843	-0.17936	-0.133332	0.117625	0.504123	-0.0804008	0.0627654	-0.144975	-0.133116	0.0899279	-0.0644166	0.0234768	-0.0877155
Root depth	-0.171464	0.51121	-0.262995	0.193422	-0.0656058	-0.462989	0.317136	-0.206385	-0.0926155	0.117492	-0.149859	-0.274696	0.0621116	0.240706	0.0248044	-0.151351	0.157812	-0.10164
Seed dry mass	-0.131919	0.49461	0.306163	-0.258243	-0.42223	0.155857	0.199481	-0.141332	0.0696971	0.0040323	0.320714	0.146039	-0.391064	0.0375326	0.121532	-0.0948768	0.0762847	-0.0469806
Specific leaf area	0.724848	0.00280646	0.199929	-0.240569	0.0251061	-0.0355309	-0.0887825	-0.072847	-0.351573	0.152177	-0.162942	-0.10869	-0.144204	-0.00308489	0.136109	-0.0259613	0.110864	0.352477
Stem diameter	-0.0405536	0.337359	-0.53785	-0.203216	0.029293	0.195331	-0.382034	-0.27131	-0.0859425	-0.393443	-0.173693	0.244152	0.057975	0.0975458	0.0978522	-0.0984781	0.103084	-0.0255989
Stomatal conduct.	0.351612	0.0593817	-0.310046	0.536928	-0.00114144	-0.227273	-0.298177	0.16187	-0.136531	-0.250027	0.417681	-0.176897	-0.174286	-0.00122011	0.0116746	-0.0411725	-0.0157007	0.0479426
Tree height	-0.203711	0.493199	-0.222242	-0.447891	-0.205792	0.0502397	-0.33151	-0.0795133	-0.114582	0.240258	0.197901	-0.219076	0.153533	-0.0855044	-0.326445	0.0626572	-0.0671816	0.016209
Wood density	-0.372696	0.33894	0.244673	0.48946	-0.0698588	-0.00683869	0.181314	-0.264316	-0.387024	-0.0188367	0.0301486	0.294353	0.157525	-0.204684	-0.0951159	0.0115841	-0.111171	0.114763

## Sheet: Fig_S15
Trait	PC1	PC2	PC3	PC4	PC5	PC6	PC7	PC8	PC9	PC10	PC11	PC12	PC13	PC14	PC15	PC16	PC17	PC18	number_traits_missing
% Variance Explained	23.6	16.3	11	9.3	6.1	5.1	4.6	4.2	3.4	3.1	2.7	2.3	2.2	1.8	1.5	1.4	0.8	0.6	2
Bark thickness	-0.276938	-0.00331867	-0.520048	-0.476143	0.0854591	0.111855	-0.144122	0.00386056	-0.170543	-0.248525	0.422591	-0.05408	-0.0203419	0.110108	0.0732608	-0.120454	-0.0320656	-0.019809	2
Conduit diam.	0.747435	0.194646	-0.535634	0.00655247	-0.111734	-0.11134	-0.124677	-0.0208061	0.0371258	-0.0402206	-0.10867	-0.0089572	0.224246	-0.103389	-0.202942	-0.245694	-0.000181807	0.0974956	2
Crown diameter	0.165251	0.881164	0.0784294	-0.0519325	-0.109698	-0.0170383	0.141997	-0.0832906	-0.131476	-0.0847168	-0.0822539	-0.0534493	-0.0525739	0.0773274	-0.133268	-0.069106	0.0905727	-0.225345	2
Crown height	-0.109375	0.79438	0.199765	-0.237308	-0.0155361	0.118759	0.150415	-0.0156316	-0.17415	-0.0518182	-0.160077	-0.105225	-0.218576	0.139606	0.000933875	-0.0219278	-0.0569292	0.198301	2
Leaf area	0.70093	0.407415	-0.338756	0.0578513	0.0549566	-0.429837	-0.206052	0.0989124	0.0808722	-0.27066	-0.0701676	0.21493	-0.149219	0.00665453	0.14129	0.161684	-0.0119718	-0.00113898	2
Leaf density	-0.24459	0.15264	-0.554935	0.205198	0.491444	0.115164	-0.143296	0.0830551	-0.391596	0.244629	-0.145791	0.032759	0.0705603	0.0140275	0.0429478	0.0723936	0.107814	0.00562736	2
Leaf K	0.486567	-0.51761	0.030738	-0.185813	-0.0590706	0.253844	-0.0234779	-0.103177	-0.00396177	-0.0449585	-0.169766	0.251168	0.106986	0.403303	-0.0334603	0.0103739	0.00210778	-0.01014	2
Leaf N	0.692368	0.113053	0.103169	0.0116317	-0.116455	0.256115	0.117118	-0.132228	-0.149365	-0.193622	-0.073872	-0.21497	0.298734	-0.0959079	0.249966	0.0955051	-0.0198205	-0.00916313	2
Leaf P	0.493808	-0.303715	0.138935	-0.211987	0.0454623	0.420296	-0.0525254	-0.12331	-0.185416	-0.108485	-0.0345384	0.22813	-0.252474	-0.298933	-0.0623841	-0.0247536	0.022305	-0.00962275	2
Leaf thickness	-0.785918	-0.0787148	-0.128314	-0.299416	-0.188898	-0.119403	-0.0249098	-0.368666	0.0444898	-0.204642	-0.0506469	0.00876949	0.0874079	-0.0494476	-0.0845398	0.160499	0.19948	0.0698693	2
Leaf Vcmax	0.699491	-0.288583	-0.319277	-0.130432	-0.0465808	0.0523915	0.0530093	0.111413	-0.0323971	0.0603149	0.0975152	-0.27346	-0.0998332	0.0387373	-0.241781	0.276907	-0.0360887	-0.00303258	2
Root depth	-0.203637	0.0753965	-0.441055	0.482217	-0.79535	0.169704	0.0484025	0.088081	-0.13981	0.103298	0.0794641	0.109764	-0.0802719	0.0164652	0.0612461	0.0214705	0.0162261	0.0160248	2
Seed dry mass	0.0139908	0.464854	-0.092283	0.336392	0.096312	0.429475	-0.472454	-0.271169	0.36811	0.0397234	0.0328323	-0.106846	-0.0757266	0.0464276	0.00806363	0.0244884	0.00114376	-0.00456096	2
Specific leaf area	0.74708	0.0222766	0.353798	0.0962021	0.0412381	0.0350681	0.0458305	0.242467	0.0740817	0.0353264	0.233089	-0.0363824	-0.0407222	0.0660529	0.0548105	-0.059241	0.267392	0.07292	2
Stem diameter	-0.227161	0.00394387	-0.29588	-0.694187	-0.167533	0.19179	-0.0588896	0.409317	0.260524	0.0921707	-0.254041	-0.0713058	-0.0279365	-0.0600078	0.106521	-0.0191836	0.0496292	-0.0428721	2
Stomatal conduct.	0.494767	-0.0256077	-0.408592	-0.278231	0.0361917	-0.148021	0.325429	-0.4608	0.121377	0.346714	0.0507891	0.00298466	-0.126128	0.00125379	0.14401	-0.0462615	0.0136527	-0.0066134	2
Tree height	0.0488186	0.775777	0.181089	-0.35625	-0.012229	0.120932	0.0375988	0.070426	0.0548254	0.213837	0.234954	0.282953	0.24135	-0.0646845	-0.0661426	0.14751	-0.0499724	0.0223071	2
Wood density	-0.243348	0.090052	-0.442536	0.339258	0.300589	0.271905	0.570133	0.111982	0.257866	-0.24098	0.00849922	0.0900206	0.0118683	-0.0128107	-0.0405027	0.0131712	0.00407563	0.01191	2
% Variance Explained	23.5	17.1	9.8	9.7	6.4	5.4	4.3	4.1	3.4	3.2	2.6	2.4	2.3	1.6	1.5	1.3	0.8	0.6	4
Bark thickness	-0.217216	0.118419	-0.410436	-0.495931	-0.0790728	0.114324	0.069046	-0.0283939	-0.0861792	-0.216589	-0.431096	-0.213177	-0.0947487	0.0890889	-0.0355466	0.120434	-0.0268732	-0.0212582	4
Conduit diam.	0.856795	0.396941	-0.497768	-0.0595304	0.125211	-0.0969434	0.0393004	-0.13257	0.0229731	-0.0229541	0.246013	-0.194058	0.0404135	0.0285548	-0.287281	0.0243782	-0.00207843	0.0735283	4
Crown diameter	0.0756016	0.891949	0.18234	0.0111581	0.109447	-0.055436	0.0713726	0.188128	-0.086262	-0.082016	0.0253494	0.109393	-0.0150775	0.0939279	-0.104897	-0.013175	0.0985318	-0.227014	4
Crown height	-0.176824	0.768072	0.30249	-0.157351	-0.044563	0.0812073	0.0164826	0.158284	-0.175516	-0.132014	0.00107153	0.290477	-0.0844915	0.0684092	-0.0501787	0.0457536	-0.0647396	0.195019	4
Leaf area	0.728853	0.471739	-0.249851	0.027327	-0.0232117	-0.43682	-0.156331	-0.201906	0.0954231	-0.240581	-0.153509	0.154371	0.167251	-0.0875936	0.2004	-0.0567546	-0.0193604	0.00383034	4
Leaf density	-0.196733	0.204115	-0.474346	0.151389	-0.525199	0.164427	-0.141398	-0.0607522	-0.452053	0.0663145	0.100416	-0.0261667	0.0620908	-0.00519746	0.0882223	-0.0646473	0.128138	0.013185	4
Leaf K	0.457882	-0.496206	-0.00224569	-0.232195	0.0580538	0.209053	0.153268	-0.050766	-0.0283754	-0.114162	0.0991711	0.112237	0.252765	0.377758	0.0955853	-0.013968	-7.01694e-05	-0.00609147	4
Leaf N	0.668847	0.151085	0.164238	0.0467813	0.0768364	0.194059	0.277587	0.180904	-0.0894411	-0.241305	0.192111	-0.231931	-0.165899	-0.112593	0.250071	0.0703747	-0.00490435	0.00216699	4
Leaf P	0.461884	-0.359675	0.159843	-0.244934	-0.0627217	0.347832	0.213603	-0.0257636	-0.112892	-0.129171	-0.108932	0.166699	0.216214	-0.29601	-0.159956	-0.045325	0.0311751	-0.0201711	4
Leaf thickness	-0.810262	-0.0111674	-0.133426	-0.324231	0.265121	-0.252502	0.358525	-0.0166205	0.0715803	-0.122322	0.0499541	-0.0311504	0.00282758	-0.024185	0.0317673	-0.174978	0.186487	0.0777303	4
Leaf Vcmax	0.681114	-0.198858	-0.205996	-0.170785	0.0313246	0.0940887	-0.0450355	0.105915	-0.0407155	0.0855565	-0.0872507	0.0875729	-0.32818	0.047411	-0.00964564	-0.329443	-0.0538853	-0.0119747	4
Root depth	-0.165505	0.173594	-0.468991	0.451294	0.754078	0.368849	-0.107659	0.042224	-0.0889836	0.0535157	-0.105853	0.0719333	0.0685638	-0.0299365	0.0588208	0.0147876	0.0114122	0.0209633	4
Seed dry mass	-0.0145077	0.455678	0.00201492	0.35562	-0.193292	0.283218	0.397419	-0.522378	0.209364	0.112925	-0.0605515	0.0881931	-0.131477	0.0381597	0.0243993	-0.000976391	0.00386169	-0.00687268	4
Specific leaf area	0.762318	-0.0779603	0.382509	0.148551	-0.0114667	0.0786555	-0.215901	0.0452466	0.131151	0.057434	-0.2066	-0.0567189	-0.0680078	0.0671876	-0.0190594	0.0581769	0.253765	0.0845748	4
Stem diameter	-0.14793	0.0918586	-0.149885	-0.738358	0.0792729	0.275535	-0.349823	-0.201149	0.199163	-0.0131161	0.225617	0.141434	-0.132017	-0.0723793	0.0709345	0.0880356	0.0565747	-0.0389557	4
Stomatal conduct.	0.421134	0.0341842	-0.3868	-0.304738	-0.0411598	-0.180224	0.309098	0.262426	0.0152119	0.456762	-0.0501257	0.161178	0.0110385	-0.0388687	0.0855174	0.156001	0.0241167	0.00473605	4
Tree height	-0.019565	0.749405	0.318009	-0.368759	0.00921825	0.224739	-0.0649642	0.0438264	0.100057	0.275102	-0.0612831	-0.264081	0.255969	-0.0104012	0.0778647	-0.154275	-0.0513284	0.0234091	4
Wood density	-0.212777	0.105102	-0.437663	0.259637	-0.363964	0.241726	-0.00461181	0.420937	0.457597	-0.176769	0.0273112	0.0397296	0.0723861	0.0013443	-0.0214175	-0.0388607	0.00569055	0.0130433	4
% Variance Explained	27.8	16.8	10.4	8.9	6.3	5.4	4.1	3.7	2.9	2.5	2.1	2	1.7	1.5	1.3	1.2	0.8	0.6	6
Bark thickness	-0.178722	0.0250928	-0.0327102	-0.463274	-0.149251	-0.067876	0.127498	0.0236027	0.137862	0.134978	-0.0206792	-0.0968624	-0.295793	-0.269684	0.00720866	0.165092	0.007346	0.0520725	6
Conduit diam.	1.02408	0.37453	0.427616	-0.29728	-0.0637644	0.150175	0.0297228	-0.146642	0.0485963	-0.0623009	-0.293079	0.129149	0.144669	-0.146125	0.116829	-0.0105791	0.0574841	-0.0459029	6
Crown diameter	0.106248	0.918496	-0.190358	0.0572874	0.156352	0.0582641	0.172889	0.165494	0.0658925	-0.0508942	0.0791715	0.0791375	0.100291	-0.0982904	0.00619237	-0.0204023	-0.227593	0.103359	6
Crown height	-0.189164	0.706376	-0.424719	0.010419	0.0357465	-0.139713	0.0516327	0.182757	0.141626	-0.14644	0.187942	0.137524	0.0255664	-0.0518389	0.0110161	0.035491	0.204049	-0.107717	6
Leaf area	0.850205	0.359518	0.185846	-0.0291502	-0.00866147	0.477212	-0.0988199	-0.0999081	0.251049	0.123365	0.262417	-0.208065	-0.0628723	0.115121	-0.0256206	-0.0209909	0.030534	-0.0025778	6
Leaf density	-0.181803	0.171133	0.287913	-0.131148	-0.668406	-0.153946	-0.122332	0.196857	0.171951	-0.258509	-0.0572385	-0.107629	-0.0109349	0.0881446	-0.0741503	-0.00307016	-0.100257	-0.0830211	6
Leaf K	0.440881	-0.468923	-0.0967877	-0.158744	0.119653	-0.22824	0.0190902	-0.0974291	0.142668	-0.0208227	0.0850437	-0.107851	0.283537	-0.143061	-0.283566	0.0700391	-0.00155121	-0.000575607	6
Leaf N	0.694177	0.0871444	-0.116114	0.168617	0.0944455	-0.2762	0.402516	0.00594791	0.202679	0.0772574	-0.201742	0.0727983	-0.126712	0.253321	-0.10378	0.0609715	0.0107105	0.0168386	6
Leaf P	0.473962	-0.413499	-0.345926	-0.130254	-0.00894499	-0.371277	0.140306	-0.121928	0.14192	-0.0810455	0.118365	-0.162994	0.0316436	-0.00498897	0.301604	-0.118572	-0.0463184	-0.0187161	6
Leaf thickness	-0.876492	-0.0289216	-0.0275312	-0.385346	0.255249	0.25062	0.298982	-0.228443	0.0973087	0.00533377	-0.0314307	0.0167852	-0.027404	0.0153438	-0.0639374	-0.102157	-0.0836248	-0.178797	6
Leaf Vcmax	0.743271	-0.266069	-0.00278682	-0.267389	0.0279475	-0.0684029	-0.0715584	0.138045	-0.0793845	-0.0829521	0.090215	0.189345	-0.212362	-0.0743147	-0.148537	-0.277708	-0.0011768	0.0155814	6
Root depth	-0.160311	0.34227	0.882877	-0.0867374	0.544872	-0.413477	-0.0628738	0.112118	-0.0326542	-0.0212846	0.0666687	-0.125556	-0.0461596	0.0180713	0.0212533	-5.52413e-05	0.00725298	-0.0244268	6
Seed dry mass	-0.0210691	0.509356	0.147396	0.240497	-0.289988	-0.28077	0.0283512	-0.601464	-0.145695	-0.0282155	0.152879	0.0864351	-0.0751386	-0.0288985	-0.0603696	0.00308364	-0.0153081	0.00800921	6
Specific leaf area	0.801282	-0.0557469	-0.200868	0.384561	0.102217	-0.0429131	-0.172167	0.0874512	-0.145309	0.119082	0.00795213	0.00776127	-0.0980782	-0.0887066	0.00814957	0.124814	-0.123688	-0.204318	6
Stem diameter	-0.0443941	0.111448	-0.252396	-0.66242	0.112476	-0.166616	-0.454615	-0.112097	0.094644	0.124197	0.0128396	0.202957	0.0251804	0.171095	0.033312	0.0901141	-0.059692	0.0136323	6
Stomatal conduct.	0.451349	-0.0643837	0.0548044	-0.539528	-0.109719	0.0953978	0.323663	0.0985051	-0.412586	-0.109831	0.176424	-0.0127508	0.0421937	0.124711	0.0127755	0.140652	-0.00140353	-0.00875513	6
Tree height	0.0651961	0.713069	-0.485299	-0.224997	-0.00778185	-0.125832	-0.0951075	-0.00709918	-0.241318	0.125338	-0.201852	-0.313138	0.0156148	0.0200574	-0.0782755	-0.125184	0.0429071	-0.00873571	6
Wood density	-0.158489	0.0325263	0.271799	-0.0373838	-0.365028	-0.167295	0.158762	0.175739	-0.00125682	0.495112	0.10378	0.099275	0.144676	-0.0118079	0.0235457	-0.0952763	0.00660722	-0.0396931	6
% Variance Explained	29	19.8	11.3	7.7	5.7	5.2	4.5	3.3	2.4	2	1.9	1.7	1.4	1.2	1	0.7	0.6	0.5	8
Bark thickness	-0.10578	-0.0548219	-0.0615369	-0.298765	-0.116206	0.165833	0.152201	0.00361932	-0.00121642	-0.0218447	-0.0387398	-0.0685431	-0.0563554	0.0659217	-0.147294	0.0951495	0.20186	-0.147126	8
Conduit diam.	1.11474	0.392364	0.254309	-0.180612	-0.261046	-0.0556263	0.0713365	0.112158	0.057484	-0.130203	-0.044647	0.144933	0.298735	-0.0295323	-0.0668583	0.0810457	-0.0128897	0.0189789	8
Crown diameter	0.164586	0.907328	-0.334554	0.0464131	0.100565	-0.0839062	0.21345	0.0015683	0.0318943	0.0964505	0.0568707	0.142429	0.0062525	-0.015175	-0.104055	-0.237529	0.0308974	-0.0485385	8
Crown height	-0.137575	0.65921	-0.583917	0.00171668	0.14455	0.0682272	0.102036	-0.0970496	0.104473	0.240616	-0.00989717	0.121616	-0.050081	-0.0738851	0.001256	0.214086	-0.026799	0.046178	8
Leaf area	0.887151	0.377808	0.083374	0.0064593	-0.314535	-0.258947	-0.0579598	0.242693	0.221101	0.134609	0.0194444	-0.257394	-0.196248	0.0230434	0.0140103	0.00238405	-0.0112715	0.0103124	8
Leaf density	-0.0581166	0.0844643	0.150535	-0.0909547	-0.423513	0.4821	0.00187995	-0.254907	0.200453	0.0980484	0.0414192	0.0354619	0.029545	0.0548129	0.133178	-0.0722815	0.0953907	0.0828479	8
Leaf K	0.544687	-0.621875	-0.0409604	-0.229602	0.287045	0.10837	-0.0716194	0.200615	0.241081	-0.0812584	0.238686	0.263153	-0.143356	0.049325	0.00496695	0.0012917	0.00990567	0.00314216	8
Leaf N	0.657545	0.0666606	-0.0728037	0.107889	0.287593	0.247558	0.435923	0.0431989	0.0405763	-0.178423	-0.302871	-0.0432615	-0.0919062	-0.00787667	0.148364	-0.0142277	-0.00466036	-0.00603176	8
Leaf P	0.412647	-0.571389	-0.276985	-0.168841	0.343873	0.288541	0.0326711	0.103988	0.0571167	0.228078	0.0334151	-0.24759	0.213803	-0.0389532	-0.0718693	-0.0465538	-0.0144175	0.0236444	8
Leaf thickness	-0.88973	-0.017818	-0.0381882	-0.403758	0.00170726	-0.235381	0.225429	0.345329	-0.0245061	0.0167511	-0.107689	0.0276678	0.025247	0.0980434	0.00448079	-0.0182787	0.0792371	0.149318	8
Leaf Vcmax	0.883183	-0.325469	-0.0925847	-0.149898	-0.0373475	-0.0828562	-0.0573687	-0.156959	-0.268694	0.215966	-0.141756	0.117916	-0.0556002	0.267652	-0.0086351	-0.00880598	-0.0298508	0.00989519	8
Root depth	0.00532809	0.61378	0.976217	-0.353513	0.494493	-0.0422172	0.0014701	-0.177774	0.0128233	0.0822875	0.0456081	-0.0532378	-0.0270318	0.0183861	0.00246939	0.0200394	0.0104035	0.00965926	8
Seed dry mass	-0.0487146	0.59661	0.170078	0.2106	0.0426642	0.484538	-0.351207	0.425038	-0.215402	0.0583738	-0.0401453	0.0532741	-0.0239918	0.0188679	0.020707	0.00712114	0.0186943	-0.0105488	8
Specific leaf area	0.691236	-0.0341098	-0.103724	0.393484	0.201832	-0.129864	-0.177981	-0.127923	-0.104466	-0.0859301	0.0152463	-0.0295218	-0.0412269	-0.0865964	-0.0731378	0.00551573	0.196093	0.132506	8
Stem diameter	0.070214	0.170743	-0.371919	-0.692225	0.021102	-0.00909486	-0.46963	-0.0983626	0.0377574	-0.105354	-0.218589	-0.00696274	-0.0503633	-0.134076	0.0116204	-0.0562931	-0.0108133	-0.00235058	8
Stomatal conduct.	0.399567	-0.10651	0.00250951	-0.384674	-0.190856	0.0378911	0.269991	0.0360635	-0.354574	0.0484137	0.216403	-0.004538	-0.0821454	-0.218982	0.0991654	-0.00280229	0.00700881	0.00672272	8
Tree height	0.0769945	0.630169	-0.484912	-0.166754	0.0925195	0.077983	-0.0217943	-0.0710944	-0.0899391	-0.254781	0.246528	-0.177481	0.0411762	0.21556	0.0485157	0.028112	-0.0302356	0.0271238	8
Wood density	-0.0715391	-0.0223957	0.15355	-0.0496936	-0.15662	0.329081	0.142239	-0.0693306	-0.0272957	-0.104068	-0.0280287	-0.0264275	-0.159994	-0.0167455	-0.278775	-0.00925707	-0.119786	0.0960024	8
% Variance Explained	29.1	17.5	13.3	8.2	6.5	4.2	3.6	3	2.6	2.3	2.2	1.7	1.5	1.3	1.1	0.9	0.6	0.4	10
Bark thickness	-0.347317	-0.0788654	0.53379	0.382672	0.305648	0.112646	0.0129813	0.179059	0.0131974	0.4135	0.180519	-0.0968372	-0.0107068	0.0788765	-0.0851609	0.002126	-0.0172634	-0.0292571	10
Conduit diam.	0.917578	0.475099	-0.13009	0.368919	-0.00225119	-0.0881155	-0.00128668	0.0238024	-0.0991441	0.0486094	-0.145956	-0.0426342	0.0927655	0.164973	0.0607625	0.232935	-0.0697047	0.0519274	10
Crown diameter	0.0642147	0.810396	0.341787	-0.133038	-0.0430423	-0.0462333	-0.0571299	-0.145845	-0.00682973	0.0128011	-0.044106	-0.062721	-0.152271	0.0961548	0.0323322	0.0496653	0.188634	-0.12237	10
Crown height	-0.178149	0.570675	0.518174	-0.286404	0.20218	0.0351393	-0.127355	-0.123686	-0.0112441	-0.0364497	-0.0482179	-0.0102265	-0.263487	0.00356121	-0.0104049	-0.0262057	-0.153719	0.104963	10
Leaf area	0.787049	0.383949	0.00746564	0.258942	0.00690589	-0.243868	0.0240319	0.228758	-0.0389041	0.0802992	-0.182769	-0.12377	-0.0664366	-0.293031	-0.0431905	-0.106732	0.0285987	0.0102881	10
Leaf density	-0.103455	0.101706	-0.580568	0.0902944	0.731942	-0.081017	-0.337774	-0.0629608	-0.123232	-0.0334079	0.0367379	0.0314809	0.0347645	0.0287028	-0.0207105	-0.0454786	0.0964074	0.0597723	10
Leaf K	0.533856	-0.499634	0.0908909	0.138727	-0.0454267	0.236023	0.0257851	-0.0301427	-0.204801	-0.146433	-0.122967	-0.280373	-0.0467739	0.196398	-0.0260696	-0.167352	0.00962183	0.00465117	10
Leaf N	0.693253	0.159449	0.131739	-0.247074	-0.134303	0.213577	-0.0985204	-0.244017	-0.169606	0.262634	-0.131808	0.226335	0.153069	-0.012301	-0.120232	-0.0924211	-0.00388921	-0.00648483	10
Leaf P	0.471908	-0.555423	0.283692	-0.089177	0.168571	0.324654	-0.0112552	-0.13105	-0.204318	-0.0295212	0.109163	-0.0745553	-0.0569286	-0.235005	0.060524	0.18498	0.0444195	0.00543446	10
Leaf thickness	-0.988488	-0.0289669	0.314628	0.301484	-0.275739	-0.0295702	0.107073	-0.100293	-0.116157	0.0696171	-0.13018	0.019125	0.0317925	-0.0144173	0.0457298	0.00220146	0.131563	0.166454	10
Leaf Vcmax	0.818885	-0.26304	0.176682	0.13854	0.114666	-0.0447389	0.074306	-0.0358659	0.125646	0.103679	0.082246	0.171031	-0.0797655	0.0495665	0.30871	-0.120328	0.023075	0.0236574	10
Root depth	-0.0326363	0.550668	-0.529524	0.494297	-0.36399	0.442551	-0.234802	-0.0734066	0.122263	0.00486873	0.16348	-0.0283089	-0.0716881	-0.061501	0.0243976	-0.0379795	-0.0144686	0.0119392	10
Seed dry mass	-0.101977	0.618617	-0.320368	-0.117542	0.06697	0.135094	0.43954	0.194407	-0.364797	-0.038604	0.182539	0.104447	-0.0450873	0.0210305	0.0191256	-0.039554	-0.00104838	0.0047661	10
Specific leaf area	0.876392	-0.0341594	-0.00548888	-0.354936	-0.0967708	0.0819695	0.0512325	0.190096	0.243928	-0.00827222	0.157591	0.00324423	-0.0488024	0.0779347	-0.154016	0.0379279	0.113512	0.127842	10
Stem diameter	-0.0290826	0.072514	0.361942	0.399251	0.334798	0.337294	0.146087	0.115321	0.17116	-0.236716	-0.230725	0.220701	0.00137219	-0.0074559	-0.0743696	0.0144291	0.022317	-0.0293565	10
Stomatal conduct.	0.418957	-0.0017229	0.210842	0.474715	0.00895217	-0.310855	0.189363	-0.379448	-0.00479137	-0.144366	0.254659	0.0396761	-0.0118174	-0.0145069	-0.151642	-0.023622	-0.0145241	-0.000342606	10
Tree height	0.0312864	0.651692	0.497518	-0.168266	0.148135	0.098814	0.0212226	-0.0234738	0.104718	-0.127392	0.12318	-0.174257	0.335212	-0.0529772	0.0915991	-0.0656872	-0.00469954	0.0245255	10
Wood density	-0.110522	0.0621271	-0.572461	-0.131461	0.27372	0.124596	0.414777	-0.29268	0.233369	0.180549	-0.149965	-0.156521	-0.0243039	-0.0287013	0.000649578	0.00785175	-0.00454241	0.0107986	10

## Sheet: Fig_S16
Trait	PC1	PC2	PC3	PC4	PC5	PC6	PC7	PC8	PC9	PC10	PC11	PC12	PC13	PC14	PC15	PC16	PC17	PC18	number_env_vars
% Variance Explained	24.4	17.6	11.5	8.7	5.9	5.1	4.5	3.9	3.3	2.7	2.4	2.1	1.8	1.8	1.4	1.3	0.9	0.7	3
Bark thickness	-0.320528	0.197207	-0.432105	0.436456	-0.308252	-0.129111	-0.0286955	-0.046889	0.216208	0.226549	-0.353776	-0.212086	0.0313968	-0.0199815	-0.0731112	0.0435724	-0.0393578	0.0315763	3
Conduit diam.	0.690558	0.356128	-0.434851	0.0121904	0.113393	0.110854	0.192676	-0.0132753	-0.0779625	-0.194497	-0.0543055	0.0133218	-0.000728909	-0.021572	-0.168516	0.308797	0.0530619	-0.089373	3
Crown diameter	0.144516	0.830962	0.252275	0.10953	0.132543	0.037128	-0.0246035	0.185256	0.0622064	-0.0974465	-0.0540019	0.0887316	-0.168228	0.0358172	-0.0474493	0.0291492	0.00234877	0.25353	3
Crown height	-0.132513	0.798194	0.244817	0.296641	0.0376021	-0.0643877	-0.113396	0.0792391	0.101584	-0.0597984	-0.0642409	0.065882	-0.248604	0.0592634	0.0431723	-0.101431	-0.00331599	-0.218219	3
Leaf area	0.623747	0.542429	-0.241922	-0.192167	-0.123812	0.23337	0.0264516	-0.131055	-0.0973337	0.00795846	-0.258163	0.193738	0.184908	0.02778	0.259263	-0.0741555	-0.0224095	0.0035928	3
Leaf density	-0.225057	0.251985	-0.631533	-0.254832	-0.408417	-0.148508	-0.0981144	-0.228773	0.255494	-0.263422	0.204155	0.0301785	-0.0694377	-0.0361401	0.0215123	-0.0681262	0.102898	0.0337556	3
Leaf K	0.502997	-0.567912	-0.070059	0.319494	-0.0671823	-0.18296	0.0796324	0.110438	-0.0450963	-0.0998666	-0.117691	0.159274	-0.143929	-0.396836	0.0563847	-0.0514043	0.00141819	0.013486	3
Leaf N	0.751448	0.108161	0.0973177	0.0696963	0.142367	-0.160583	-0.00779232	0.226623	0.126692	-0.322238	-0.012978	-0.318952	0.208122	0.000830386	0.0055929	-0.149767	-0.0294328	-0.0085723	3
Leaf P	0.5567	-0.330247	0.0368165	0.362534	-0.165333	-0.369787	0.0426231	0.165986	0.217494	0.0653194	0.0869887	0.295361	0.130222	0.247327	-0.0107338	0.0525195	0.0151229	-0.00254516	3
Leaf thickness	-0.798103	0.0174653	-0.106022	0.32373	0.0268746	0.145907	0.294804	0.315407	-0.0428396	-0.0374796	0.0118638	-0.0483706	0.0793877	0.00769804	0.16978	0.0244375	0.237649	0.0020675	3
Leaf Vcmax	0.734224	-0.179272	-0.30345	0.229869	0.152455	-0.0192553	-0.143073	-0.0760423	-0.00975659	0.136333	0.166665	-0.213055	-0.205333	0.0889958	0.272747	0.115493	-0.00813603	0.0293162	3
Root depth	-0.207392	-0.058087	-0.361861	-0.0732914	0.788765	-0.0638191	0.0515477	-0.160352	0.349908	0.0825437	-0.0594338	0.104201	0.0422514	-0.0508451	6.964e-05	-0.0571298	0.0299059	0.000419833	3
Seed dry mass	0.055494	0.41231	0.0378969	-0.325223	0.0131454	-0.581652	0.547363	-0.0947657	-0.179317	0.133002	0.00424131	-0.07331	-0.0612287	0.0132186	0.0295515	-0.0389983	0.000179742	0.00570223	3
Specific leaf area	0.747522	-0.0256582	0.386286	-0.117649	-0.0185296	-0.0501143	-0.23557	-0.172052	-0.0275762	0.174311	-0.112136	-0.0559574	-0.0111651	-0.0102669	-0.0995001	-0.0635544	0.285266	0.00121183	3
Stem diameter	-0.291877	0.16893	-0.219852	0.656969	0.188306	-0.195764	-0.176168	-0.322609	-0.408354	-0.131519	0.0530759	0.0424098	0.100055	0.0499683	-0.0525399	-0.0742782	0.00897218	0.0339014	3
Stomatal conduct.	0.52568	0.212285	-0.579753	0.139571	-0.0362259	0.303834	0.164502	0.205387	-0.0805487	0.252366	0.204956	0.0131164	-0.033898	-0.006021	-0.160092	-0.224211	-0.00975355	-0.00371452	3
Tree height	0.0251839	0.754486	0.331544	0.180336	-0.0449357	-0.0481021	-0.0869003	-0.0518539	0.115643	0.195429	0.282908	0.00166732	0.213431	-0.276621	0.0445863	0.110704	-0.017993	-0.0168629	3
Wood density	-0.239998	0.1746	-0.469485	-0.403334	0.107347	-0.32993	-0.461691	0.428229	-0.202383	0.0904076	-0.0411836	0.0392269	0.0385208	-0.0371564	0.00937895	0.0455061	0.0130215	-0.016567	3
% Variance Explained	24.5	16.4	11.2	9.2	5.5	5	4.5	4.1	3.4	2.8	2.7	2.3	2.2	1.8	1.4	1.3	0.8	0.7	10
Bark thickness	-0.285306	0.00815082	-0.509746	-0.428653	-0.0913528	0.124357	-0.116374	-0.0455403	-0.109914	-0.133621	-0.502944	0.0901597	0.00253534	0.108271	-0.092861	0.0704824	-0.040559	0.0276836	10
Conduit diam.	0.697636	0.256583	-0.498724	0.00154157	0.113837	-0.077107	-0.167617	0.0232823	0.0366548	-0.115496	0.112478	0.0165336	0.156484	-0.0680514	0.111311	0.311837	0.00113561	-0.1153	10
Crown diameter	0.113437	0.881466	0.109942	-0.106858	0.115967	-0.000937235	0.129646	0.0970355	-0.134884	-0.100031	0.0612711	0.018383	-0.0818124	0.0901025	0.0934409	0.104511	0.104593	0.23085	10
Crown height	-0.170046	0.760693	0.227327	-0.297438	-0.0175697	0.136068	0.192923	0.0105147	-0.161104	-0.0842438	0.122471	0.0748986	-0.234218	0.130305	-0.0486837	-0.00805009	-0.0777815	-0.198097	10
Leaf area	0.651826	0.466407	-0.260326	0.0747109	-0.0127608	-0.342125	-0.239801	-0.123425	0.0551072	-0.290989	-0.0179673	-0.264714	-0.0884607	-0.00914864	-0.0867038	-0.206161	-0.010008	-8.68438e-05	10
Leaf density	-0.257672	0.212613	-0.593014	0.292107	-0.50325	0.105825	-0.0534705	-0.142604	-0.392375	0.147071	0.160678	-0.00427749	0.0809773	0.0130574	-0.019938	-0.0585129	0.101072	-0.0106106	10
Leaf K	0.550616	-0.540527	-0.0439887	-0.194687	0.00992624	0.249094	0.000749898	0.0865127	-0.00553058	-0.0284373	0.149405	-0.208391	0.110375	0.424121	0.00517187	-0.0108163	-0.00273336	0.0107752	10
Leaf N	0.740659	0.127485	0.107681	-0.0189511	0.095412	0.244258	0.126297	0.165577	-0.12306	-0.18931	0.0411904	0.257477	0.311174	-0.1109	-0.157758	-0.146784	-0.0152219	0.0149885	10
Leaf P	0.569931	-0.320768	0.11548	-0.243521	-0.142287	0.437571	0.0506873	0.112769	-0.183177	-0.0514466	-0.0573878	-0.273329	-0.191346	-0.28046	0.0411675	0.0427308	0.0215513	0.00574377	10
Leaf thickness	-0.77522	-0.124653	-0.152691	-0.331549	0.144849	-0.0558846	-0.0773717	0.370319	0.0187642	-0.170059	0.0110313	-0.0200089	0.0600164	-0.026762	0.12887	-0.124837	0.213995	-0.087103	10
Leaf Vcmax	0.752955	-0.182239	-0.374506	-0.101608	0.0663084	0.0172515	0.0764446	-0.131583	-0.00603038	0.0795223	-0.0508327	0.241656	-0.154456	0.0257856	0.31582	-0.178499	-0.030966	0.000705279	10
Root depth	-0.1957	0.130298	-0.338085	0.384664	0.772525	0.261532	-0.0360487	-0.0889296	-0.16667	0.148797	-0.0537221	-0.104138	-0.0435417	0.000723803	-0.0633945	-0.0380208	0.016588	-0.0212082	10
Seed dry mass	0.019033	0.451038	-0.0005818	0.3412	-0.177844	0.46072	-0.457006	0.234528	0.346628	0.0547158	-0.00874678	0.0951413	-0.103231	0.0398885	0.0039947	-0.0318396	0.000854961	0.00773061	10
Specific leaf area	0.742547	0.0359473	0.381956	0.119528	-0.0372257	-0.00550456	0.0810751	-0.244547	0.0912294	0.0898101	-0.21517	0.0590261	-0.0387914	0.073494	-0.0833168	0.0399972	0.264251	-0.0842036	10
Stem diameter	-0.244243	-0.00510817	-0.295275	-0.658027	0.0837724	0.209978	-0.0314618	-0.41905	0.280059	0.010253	0.265448	0.046691	-0.0155053	-0.089412	-0.107798	-0.0133662	0.0557112	0.0480259	10
Stomatal conduct.	0.4945	0.0885963	-0.504734	-0.250129	-0.0114795	-0.234958	0.19108	0.426151	0.11143	0.34791	0.0185688	-0.00097065	-0.115379	-0.0171025	-0.17981	-0.00443232	0.0121853	0.00940432	10
Tree height	0.0149164	0.753401	0.206059	-0.345816	-0.0355426	0.0638077	0.0249409	-0.0665833	0.0737631	0.292391	-0.159208	-0.214866	0.306836	-0.033758	0.134497	-0.08124	-0.0453897	-0.0301542	10
Wood density	-0.261109	0.137954	-0.430689	0.412069	-0.127235	0.183651	0.60176	-0.0172184	0.318374	-0.183898	-0.0736932	-0.10611	0.0340744	0.00055435	0.0346329	-0.00072444	-0.000335578	-0.0121779	10
% Variance Explained	24.1	16.4	11	9.2	5.7	5.1	4.3	4.1	3.4	2.9	2.8	2.3	2.1	1.9	1.5	1.4	0.9	0.8	15
Bark thickness	-0.257947	0.0316639	-0.510557	-0.40216	0.130233	0.174751	-0.000567221	-0.00589677	-0.0933867	-0.450164	0.293038	-0.061117	-0.0599423	-0.10235	-0.13632	0.0040109	0.00403661	0.0531547	15
Conduit diam.	0.697158	0.277538	-0.475455	0.0384207	-0.140162	-0.0481084	0.172837	0.0603832	0.00649574	0.0214979	-0.109089	-0.052516	-0.149353	0.0482059	-0.125464	-0.329062	0.0456687	-0.101778	15
Crown diameter	0.12796	0.864255	0.132638	-0.0855272	-0.129215	-0.020317	-0.135606	0.111564	-0.0985668	-0.0414867	-0.136252	0.0112723	0.0703275	-0.100394	0.0135261	-0.0995326	-0.244268	0.161137	15
Crown height	-0.152348	0.758969	0.189603	-0.330861	-0.0132194	0.111401	-0.188753	0.0222632	-0.105125	-0.0333209	-0.160195	-0.0464353	0.203337	-0.194602	0.00689209	0.0233886	0.185477	-0.148369	15
Leaf area	0.685039	0.389431	-0.305028	0.0647528	0.0248564	-0.312001	0.289108	-0.159835	0.0296582	-0.23905	-0.160494	0.310619	0.0291155	0.0154678	0.0481855	0.183719	0.0216291	-0.00219258	15
Leaf density	-0.272422	0.239429	-0.539484	0.356478	0.544419	0.122822	0.0252621	-0.0132672	-0.408814	0.183726	-0.059255	-0.0392016	-0.0429706	0.00120174	0.0441435	0.0618234	-0.0734031	-0.0645261	15
Leaf K	0.524187	-0.568113	-0.0459624	-0.16503	0.0163448	0.262305	-0.0228344	0.0763315	-0.0041294	0.112825	-0.0814789	0.212719	-0.193464	-0.388574	0.0931632	-0.0117656	-0.00798524	0.0147478	15
Leaf N	0.735486	0.126115	0.135463	-0.0142424	-0.100611	0.238592	-0.179167	0.154596	-0.0488326	-0.115191	-0.201555	-0.247181	-0.289914	0.142723	-0.0183231	0.205707	0.0219802	0.0150236	15
Leaf P	0.558596	-0.331873	0.113787	-0.226681	0.157932	0.446548	-0.121396	0.111581	-0.119004	-0.0495238	-0.0465859	0.271681	0.233032	0.253429	-0.0674779	-0.0632562	-0.0226674	-0.0111884	15
Leaf thickness	-0.757597	-0.151721	-0.205913	-0.338388	-0.191828	-0.0322214	0.0525775	0.323381	0.0854174	-0.128929	-0.0996735	0.0581362	-0.0660869	0.0832241	0.182917	0.0191561	-0.146868	-0.18404	15
Leaf Vcmax	0.751641	-0.181003	-0.370052	-0.0791559	-0.0499422	0.0197931	-0.0779706	-0.138576	-0.00951057	-0.0546598	0.0996808	-0.230852	0.186184	0.0212444	0.366841	-0.0583253	0.0128133	0.0271199	15
Root depth	-0.194128	0.0645619	-0.283173	0.382345	-0.753352	0.298722	-0.00103905	-0.164342	-0.234659	0.0545618	0.115115	0.0901772	0.0389914	-0.00639501	-0.0287286	0.0748443	-0.00732814	-0.0264234	15
Seed dry mass	0.00703474	0.465331	0.0255593	0.325813	0.106946	0.492406	0.446271	0.212083	0.356057	0.0152763	0.0794113	-0.0702363	0.0903414	-0.0461867	0.0353409	0.0391146	-0.00159364	0.0105376	15
Specific leaf area	0.730088	0.0444242	0.404248	0.10149	0.0835759	-0.0230361	-0.0682827	-0.242968	0.0649787	-0.0527058	0.226489	-0.0623556	0.0139417	-0.085538	-0.0862998	0.0403438	-0.189246	-0.209617	15
Stem diameter	-0.195828	0.0258419	-0.354371	-0.649901	-0.0169873	0.186589	0.0961659	-0.450731	0.203662	0.241023	-0.181196	-0.082251	0.0106356	0.0460705	-0.0857473	0.065828	-0.0718746	0.0172431	15
Stomatal conduct.	0.50832	0.0855745	-0.535857	-0.173593	-0.0704847	-0.236436	-0.187905	0.403524	0.121535	0.285262	0.197401	0.00413891	0.126348	-0.0240912	-0.122741	0.14553	-0.00534369	0.00139016	15
Tree height	0.0213954	0.754736	0.194558	-0.328321	0.0457695	0.0625601	-0.0473509	-0.0735924	-0.0132637	0.172521	0.330194	0.196948	-0.255034	0.138367	0.157267	-0.0266914	0.0562181	0.00500538	15
Wood density	-0.269782	0.178151	-0.390168	0.462066	0.111057	0.109705	-0.55101	-0.135917	0.38699	-0.100289	-0.0687598	0.125801	-0.0500959	0.0111334	0.0176585	-0.0391992	0.00785539	-0.012684	15
% Variance Explained	23.7	17.7	10.5	8.9	5.8	5.2	4.3	4	3.4	3.1	2.6	2.3	2.1	1.9	1.5	1.3	0.9	0.8	20
Bark thickness	-0.292141	0.00267706	-0.479892	-0.352378	-0.208632	0.114461	-0.011743	0.10728	-0.133446	-0.548064	0.0266137	0.00106743	-0.0280574	0.0877308	0.165257	-0.0348204	0.0335284	-0.031778	20
Conduit diam.	0.704768	0.24489	-0.466853	0.0493106	0.190612	-0.0261274	-0.179054	0.0847683	0.000245665	0.0634544	-0.178532	-0.014354	-0.0979356	-0.0797006	0.0391574	-0.339285	-0.00347505	0.0921267	20
Crown diameter	0.25189	0.835132	0.15068	-0.088643	0.0967653	0.0637593	0.069315	-0.126522	-0.146637	0.0280644	-0.0976973	0.0216516	0.08973	0.126694	-0.00132145	-0.0890904	-0.127303	-0.249467	20
Crown height	-0.0301043	0.780716	0.189021	-0.301377	-0.0663502	0.169135	0.176744	-0.121241	-0.124346	0.0778564	-0.0633787	0.127991	0.189456	0.180839	0.0202891	0.00046834	0.0906836	0.207399	20
Leaf area	0.712234	0.463632	-0.146108	0.0447028	0.0728455	-0.288027	-0.07396	0.242223	0.0238163	-0.107953	-0.223123	-0.302874	0.140302	-0.00570298	-0.00934539	0.227703	0.0151087	0.0237209	20
Leaf density	-0.26475	0.274601	-0.534361	0.3528	-0.572835	-0.0699961	-0.0225859	0.112449	-0.345645	0.237266	0.024405	0.0348177	-0.0679529	-0.0068002	-0.0267492	0.0605857	-0.0945731	0.0234491	20
Leaf K	0.404752	-0.654947	-0.0769141	-0.15265	-0.0851309	0.209785	-0.0531224	-0.113417	-0.029477	0.165256	-0.0830169	-0.248276	-0.157825	0.392268	-0.0123418	0.00794336	0.0102525	-0.00392411	20
Leaf N	0.754273	0.000866151	0.0575044	-0.00549637	0.0203536	0.261115	0.0398499	-0.215842	-0.122141	-0.0740777	-0.252311	0.231036	-0.280719	-0.148682	0.0402064	0.18742	0.0181075	-0.00338059	20
Leaf P	0.502789	-0.437825	0.0597541	-0.188687	-0.282501	0.361342	-0.0194208	-0.209801	-0.155127	0.0159865	0.031496	-0.209424	0.287973	-0.258089	0.00553671	-0.0515954	-0.0213951	-0.00394694	20
Leaf thickness	-0.774855	-0.021924	-0.129631	-0.359263	0.226008	-0.0219524	-0.240364	-0.238194	-0.0372736	-0.0995778	-0.149057	-0.055346	-0.0205293	-0.0287336	-0.160188	0.0479273	-0.22164	0.0994817	20
Leaf Vcmax	0.685899	-0.264132	-0.444601	-0.125143	0.00721346	0.0234867	0.140806	0.103083	0.0427575	-0.109546	0.0951857	0.216676	0.115649	0.0711374	-0.36703	0.0066966	0.00741468	-0.0208443	20
Root depth	-0.201467	0.0949887	-0.363294	0.353948	0.596536	0.5008	0.130386	0.155508	-0.174247	0.0417485	0.17238	-0.087613	0.0258276	-0.002317	0.0402896	0.0812294	-0.019432	0.0186698	20
Seed dry mass	0.0723901	0.439904	0.0129284	0.35486	-0.210222	0.398293	-0.559446	-0.0203258	0.332805	-0.0663207	0.0620971	0.0719059	0.0583931	0.0704656	-0.0226939	0.0428239	0.00065008	-0.00358348	20
Specific leaf area	0.745876	-0.0824078	0.352882	0.122845	-0.104357	0.00376401	0.211334	0.148241	0.117845	-0.135413	0.172103	0.0363644	-0.0295511	0.0666657	0.115064	-0.0101548	-0.258677	0.106277	20
Stem diameter	-0.229985	0.0980155	-0.314967	-0.645941	-0.102981	0.239916	0.156838	0.299775	0.349134	0.275332	-0.0953774	0.0341348	-0.0183362	-0.0868646	0.0786815	0.0549538	-0.0496397	-0.042204	20
Stomatal conduct.	0.490832	0.0889907	-0.537918	-0.249759	0.151789	-0.298761	-0.138572	-0.385729	0.06289	0.133355	0.307958	0.0680319	0.0482465	0.0160463	0.167049	0.0977613	-0.005783	-0.00600796	20
Tree height	0.15852	0.74837	0.186679	-0.316457	-0.0930146	0.0643365	0.0338589	-0.0155869	-0.00968828	-0.0405764	0.307671	-0.241231	-0.296621	-0.102612	-0.161359	-0.0194528	0.0474466	0.013394	20
Wood density	-0.261063	0.223848	-0.406173	0.445968	-0.137571	0.0317609	0.446031	-0.3791	0.332194	-0.105671	-0.110973	-0.139816	-0.0143512	-0.0107065	-0.0242279	-0.0296608	-0.000940783	0.00935465	20
% Variance Explained	23.3	17.7	10.3	8.9	6.1	5.3	4.3	4	3.4	2.9	2.7	2.4	2.1	1.9	1.7	1.4	0.9	0.8	25
Bark thickness	-0.355512	-0.079159	-0.43003	-0.363268	0.288369	0.0879346	-0.0488161	0.0378378	-0.0722045	-0.517	0.153557	-0.0161665	-0.0558984	0.123411	0.131203	-0.0205864	-0.0356583	0.0238209	25
Conduit diam.	0.68848	0.155054	-0.519955	0.0481118	-0.175151	0.0397797	0.194399	0.104367	-0.00241995	0.042433	0.136836	0.124296	-0.0741445	-0.108519	0.059914	-0.332393	0.0185853	-0.0926728	25
Crown diameter	0.214115	0.852976	0.0783524	-0.0944003	-0.0800723	0.0660507	-0.0779684	-0.13884	-0.1038	0.0295668	0.1184	0.0131938	0.0395763	0.115391	-0.06242	-0.106886	0.125889	0.259561	25
Crown height	-0.0524985	0.787129	0.144985	-0.306558	0.0960781	0.116593	-0.137573	-0.131841	-0.090941	0.0887601	0.0494501	-0.00436968	0.200462	0.219565	-0.0815728	-0.0499549	-0.08582	-0.210787	25
Leaf area	0.701403	0.461065	-0.0920919	-0.0105616	-0.10827	-0.242641	0.016586	0.310925	0.103694	0.0025844	0.357565	-0.250555	-0.0027275	-0.0274734	0.0116188	0.208069	-0.00530634	-0.0246644	25
Leaf density	-0.285468	0.239345	-0.510866	0.34331	0.589798	-0.1782	0.0654819	0.096807	-0.363277	0.195255	-0.0244579	0.0327512	-0.0381041	-0.000502511	-0.0323479	0.0702217	0.096295	-0.0221627	25
Leaf K	0.381762	-0.664498	-0.0784271	-0.18491	0.102395	0.17771	0.0430842	-0.0814867	0.0391014	0.204312	0.0949932	-0.141872	-0.32042	0.292592	-0.147978	-0.0186941	-0.00130414	0.00352258	25
Leaf N	0.744458	0.0102716	0.0306568	0.00541121	0.0457369	0.258302	-0.0382692	-0.290211	-0.0954409	0.0187457	0.16741	0.389288	-0.0788168	-0.0652341	0.0933413	0.216105	-0.0374525	-0.00902564	25
Leaf P	0.512503	-0.413378	0.0564918	-0.192022	0.330256	0.291679	0.02095	-0.256478	-0.106185	0.0597594	0.0605057	-0.325759	0.215944	-0.218867	0.0716981	-0.0484693	0.0324083	0.0138739	25
Leaf thickness	-0.776872	-0.0442877	-0.103863	-0.34729	-0.266708	0.0319502	0.251068	-0.208943	0.0163798	-0.0443806	0.1669	0.0171615	-0.019813	-0.104305	-0.145705	0.0819108	0.229938	-0.0931753	25
Leaf Vcmax	0.657061	-0.278046	-0.446548	-0.135339	0.00529437	-0.0178738	-0.138925	0.0956691	0.0171821	-0.160106	-0.132532	0.0999856	0.179709	-0.0546093	-0.385824	0.0424894	-0.0187779	0.0282804	25
Root depth	-0.20506	0.0728555	-0.443303	0.317377	-0.48744	0.53653	-0.259058	0.112259	-0.221366	0.0127298	-0.0939939	-0.149701	-0.0147647	0.0257485	0.0525895	0.0813495	0.0187465	-0.020368	25
Seed dry mass	0.0594918	0.43473	-0.0369103	0.357667	0.222759	0.447228	0.513842	0.0677345	0.31731	-0.0879804	-0.104195	-0.0139244	0.0649114	0.0791862	-0.0386942	0.06045	0.000397828	0.0119834	25
Specific leaf area	0.744701	-0.030036	0.342921	0.123742	0.126944	-0.01074	-0.23881	0.0928555	0.076722	-0.179074	-0.175305	0.0117675	-0.0373083	0.0978612	0.0814943	-0.00956091	0.269165	-0.104215	25
Stem diameter	-0.23712	0.0746926	-0.311445	-0.669944	0.157049	0.181213	-0.179868	0.285978	0.295757	0.284946	-0.0891961	0.114803	0.036668	-0.0467336	0.124312	0.040565	0.0515648	0.0393213	25
Stomatal conduct.	0.474602	0.107576	-0.517637	-0.242881	-0.235491	-0.333468	0.228525	-0.3197	-0.00363946	0.0231766	-0.297945	-0.0880337	0.0554848	0.135996	0.160088	0.0921955	0.00117867	0.0085715	25
Tree height	0.135107	0.771752	0.119438	-0.29801	0.0989211	0.0606018	-0.0322622	-0.0593251	-0.049803	-0.0911351	-0.237499	-0.123309	-0.357553	-0.236873	-0.09006	0.0105376	-0.059155	-0.0231395	25
Wood density	-0.270558	0.189475	-0.433108	0.444668	0.131474	-0.0982102	-0.370982	-0.38725	0.420715	0.00937834	0.0942385	-0.0616631	-0.0468646	-0.0461498	-0.0211852	-0.0271754	-0.000191922	-0.0184851	25
% Variance Explained	22.9	16.9	9.4	8.5	6.8	5.5	4.4	4.2	3.4	3.2	2.9	2.6	2.3	1.9	1.7	1.5	1.1	0.9	50
Bark thickness	-0.404203	-0.209254	0.341169	-0.242035	0.354524	-0.0596501	0.0498884	0.104883	0.218183	-0.377763	0.176217	-0.117493	0.0730668	0.224166	0.189054	0.0493305	-0.0404687	-0.0282366	50
Conduit diam.	0.707061	0.197255	0.424873	-0.110481	-0.214475	0.0516989	-0.0293006	0.221619	0.0890217	-0.121473	-0.234965	0.0212538	-0.0397671	-0.010941	0.112933	-0.315761	-0.0394573	0.103416	50
Crown diameter	0.252968	0.813711	-0.101378	-0.132699	-0.0497333	-0.106947	-0.00721745	-0.163408	-0.0663093	-0.0947839	-0.0974817	0.0266206	0.0365565	0.127253	0.0690036	-0.0647997	0.224351	-0.230235	50
Crown height	-0.0522846	0.675921	-0.154068	-0.369287	0.158515	-0.266228	0.0647107	-0.237393	-0.173368	0.00451849	-0.0529474	0.205938	0.162236	0.171707	-0.0463262	0.00629267	-0.152292	0.159785	50
Leaf area	0.71897	0.43869	0.0599809	0.0833036	-0.068288	0.28813	0.214304	0.234755	0.0820889	0.0171738	-0.227734	-0.175765	0.190038	0.0699297	-0.0356455	0.279226	-0.0155107	0.0268676	50
Leaf density	-0.240687	0.233614	0.596847	0.230506	0.570167	0.183793	-0.0853058	0.023489	-0.407158	-0.0823744	-0.103799	0.0025038	-0.101592	-0.0616205	-0.060896	0.029193	0.0897625	0.0523518	50
Leaf K	0.302699	-0.690329	-0.0143817	-0.170265	0.0484326	-0.16386	-0.120613	0.00101149	-0.130853	0.2059	-0.220314	-0.178263	-0.200963	0.360952	-0.0743585	0.000414249	0.00264612	-0.0165612	50
Leaf N	0.708757	-0.0545447	-0.00573723	-0.0329923	0.0619598	-0.340051	-0.0792724	-0.160591	0.141322	-0.296112	-0.14316	0.137593	-0.305996	-0.154438	-0.00578691	0.195948	-0.0382154	-0.00532047	50
Leaf P	0.484882	-0.435697	-0.102495	-0.183334	0.286592	-0.301575	-0.241924	-0.107837	-0.0672684	-0.0107119	-0.0897937	-0.249531	0.350591	-0.215262	0.0234078	-0.0397639	0.0403216	0.0053883	50
Leaf thickness	-0.775478	0.0127542	-0.0694971	-0.333478	-0.273744	0.0627593	-0.264332	0.019113	0.177898	-0.167354	-0.14429	-0.0246402	0.0141028	0.0128813	-0.151478	0.0542506	0.211829	0.165207	50
Leaf Vcmax	0.58172	-0.382933	0.40836	-0.291185	0.0524272	0.0439091	0.153441	0.0353671	0.0837421	-0.0451716	0.176892	0.215569	0.124706	0.0255255	-0.350672	-0.0436074	0.042776	-0.0760828	50
Root depth	-0.209516	0.0372053	0.507385	-0.010033	-0.575141	-0.494967	0.227414	0.0716067	-0.276847	-0.0285984	0.129579	-0.154637	0.00990107	-0.0425581	0.00922865	0.0776466	0.0243447	0.0183155	50
Seed dry mass	0.0834054	0.4408	0.181538	0.321226	0.0965407	-0.362271	-0.479908	0.381216	0.169081	0.216217	0.126885	0.125958	0.0495856	0.0697661	-0.0203202	0.054265	0.00459442	-0.00803108	50
Specific leaf area	0.74048	-0.0874444	-0.229473	0.217653	0.179235	-0.0910321	0.244639	-0.0352526	0.0346973	0.0585544	0.267367	0.0108977	-0.0556442	0.07685	0.0969627	-0.0154482	0.223789	0.196592	50
Stem diameter	-0.251129	0.0912255	0.08211	-0.754798	0.256896	-0.0730576	0.224504	0.245026	0.07731	0.335278	-0.0619999	0.0604374	-0.11814	-0.164275	0.115347	0.0496435	0.0562327	-0.0197704	50
Stomatal conduct.	0.51811	-0.0191292	0.357386	-0.372889	-0.261726	0.368868	-0.386278	-0.285455	-0.0931665	0.125423	0.22116	0.0371775	-0.00537202	0.0147485	0.160705	0.115258	-0.00758834	0.0204067	50
Tree height	0.211251	0.732192	-0.148788	-0.240391	0.112591	0.039494	-0.0724075	0.00798576	0.0504475	-0.0340551	0.253346	-0.393858	-0.203866	-0.051122	-0.187676	-0.0792824	-0.0728688	0.0101094	50
Wood density	-0.268661	0.179684	0.557383	0.263899	0.086037	-0.0954053	0.12815	-0.47866	0.385346	0.247528	-0.110974	-0.11001	0.0103012	-5.92361e-06	-0.024655	-0.0245217	0.00687673	0.0180487	50
